# Supplementary material for: Dermomyotome-derived endothelial cells migrate to the dorsal aorta to support hematopoietic stem cell emergence
Source: eLife. 2023 Sep 11;12:e58300. doi: 10.7554/eLife.58300 (PMC10495111; doi:10.7554/eLife.58300)
Supplement: Figure 1—source data 1. — The transcriptomes were extracted and read from cells purified collected from TgBAC(etv2:Kaede)ci6, Tg(fli1:DsRed)um13; Tg(tp1:GFP)um14, and Tg(drl:H2B-dendra) embryos at 22–24 hpf. [file elife-58300-fig1-data1.xlsx]

## Sheet: Sheet1
Transcriptomes of all endothelial cells clusters (Including also Myeloid and Erythroid cells)
The transcriptomes were extracted and read from cells purified from etv2:Kaede,fli1:dsRed;tp1:GFP, and drl:H2B-dendra at 22 to 24 hpf
gene	p_val	avg_log2FC	pct.1	pct.2	p_val_adj	cluster
marcksl1a	0	2.48825	0.989	0.297	0	General endothelium
krt18a.1	0	2.2792	0.875	0.162	0	General endothelium
tpm4a	0	2.15336	0.942	0.215	0	General endothelium
cdh5	0	2.06937	0.933	0.094	0	General endothelium
akap12b	0	2.01454	0.78	0.147	0	General endothelium
marcksl1b	0	1.98084	0.944	0.308	0	General endothelium
si:ch211-156j16.1	0	1.91533	0.78	0.102	0	General endothelium
cldn5b	0	1.7446	0.58	0.061	0	General endothelium
egfl7	0	1.70941	0.767	0.075	0	General endothelium
etv2	0	1.67285	0.758	0.093	0	General endothelium
cd81a	0	1.65389	0.807	0.209	0	General endothelium
clec14a	0	1.54982	0.687	0.076	0	General endothelium
tmem88a	0	1.54505	0.704	0.071	0	General endothelium
stab2	0	1.51524	0.727	0.081	0	General endothelium
aplnrb	0	1.36233	0.541	0.054	0	General endothelium
plvapb	0	1.28878	0.506	0.028	0	General endothelium
sox7	0	1.26531	0.542	0.072	0	General endothelium
plk2b	0	1.25367	0.588	0.058	0	General endothelium
tjp1a	0	1.20183	0.615	0.096	0	General endothelium
tie1	0	1.17725	0.664	0.064	0	General endothelium
rab11bb	0	1.13409	0.52	0.057	0	General endothelium
mcamb	0	1.13224	0.549	0.08	0	General endothelium
nova2	0	1.12232	0.607	0.083	0	General endothelium
scarf1	0	1.10418	0.584	0.051	0	General endothelium
ramp2	0	1.06096	0.577	0.067	0	General endothelium
dab2	0	1.0362	0.552	0.076	0	General endothelium
flt4	0	1.03499	0.582	0.045	0	General endothelium
kirrel3l	0	1.01075	0.553	0.042	0	General endothelium
afap1l1b	0	1.01075	0.482	0.061	0	General endothelium
kdrl	0	0.996782	0.523	0.06	0	General endothelium
mmp14b	0	0.957673	0.508	0.043	0	General endothelium
gpr182	0	0.954756	0.519	0.049	0	General endothelium
jam3b	0	0.937718	0.544	0.063	0	General endothelium
afdna	0	0.922017	0.517	0.073	0	General endothelium
rasip1	0	0.87523	0.459	0.048	0	General endothelium
lyve1b	0	0.765032	0.356	0.017	0	General endothelium
robo4	0	0.705607	0.395	0.028	0	General endothelium
si:dkey-28n18.9	0	0.66928	0.331	0.013	0	General endothelium
pecam1	0	0.652097	0.312	0.01	0	General endothelium
sele	0	0.605918	0.334	0.02	0	General endothelium
myct1a	1.80958e-306	0.76195	0.455	0.051	3.13039e-302	General endothelium
bcl6b	9.28948e-302	0.849071	0.359	0.028	1.60699e-297	General endothelium
jpt1b	3.53964e-297	1.18924	0.603	0.118	6.12322e-293	General endothelium
fmnl3	1.04184e-296	0.666878	0.416	0.044	1.80228e-292	General endothelium
krt8	5.08393e-285	1.81026	0.837	0.288	8.79469e-281	General endothelium
tmem88b	1.3559e-280	1.08098	0.442	0.056	2.34557e-276	General endothelium
cx43	1.579e-267	1.06415	0.463	0.066	2.73152e-263	General endothelium
sash1a	9.49733e-258	0.822207	0.507	0.087	1.64294e-253	General endothelium
fscn1a	7.84495e-252	1.04893	0.442	0.064	1.3571e-247	General endothelium
cdc42ep5	7.62956e-248	0.820984	0.391	0.049	1.31984e-243	General endothelium
fam171a2a	3.84289e-247	0.497523	0.335	0.032	6.64781e-243	General endothelium
nr2f2	8.35343e-246	0.66828	0.402	0.052	1.44506e-241	General endothelium
nrp2b	2.04924e-245	0.488255	0.318	0.028	3.54497e-241	General endothelium
si:dkey-52l18.4	4.92526e-242	0.782268	0.447	0.071	8.52021e-238	General endothelium
lfng	1.75684e-241	0.785033	0.445	0.069	3.03915e-237	General endothelium
ldb2a	1.33136e-240	0.783471	0.409	0.056	2.30312e-236	General endothelium
stab1	4.10428e-240	0.470392	0.295	0.023	7.09999e-236	General endothelium
glula	3.20924e-237	0.733175	0.391	0.049	5.55167e-233	General endothelium
id1	4.81518e-235	1.76433	0.678	0.192	8.32978e-231	General endothelium
cnn3a	2.09335e-232	0.788197	0.42	0.064	3.62129e-228	General endothelium
dusp5	4.93038e-227	1.55778	0.731	0.248	8.52907e-223	General endothelium
fli1a	3.87701e-226	1.17386	0.668	0.206	6.70684e-222	General endothelium
mef2cb	2.29712e-225	0.673207	0.42	0.066	3.97379e-221	General endothelium
zfp36l2	2.52277e-223	0.861885	0.435	0.074	4.36414e-219	General endothelium
CR382300.1	4.56776e-220	0.478896	0.218	0.01	7.90178e-216	General endothelium
ednraa	3.33644e-219	0.416398	0.245	0.016	5.77171e-215	General endothelium
she	1.59076e-216	0.491367	0.302	0.03	2.75186e-212	General endothelium
pmp22a	1.11448e-215	0.677566	0.444	0.075	1.92794e-211	General endothelium
midn	1.16687e-213	0.977827	0.64	0.2	2.01857e-209	General endothelium
cdc42bpb	3.68257e-210	0.568153	0.365	0.051	6.37048e-206	General endothelium
lmo4a	1.00882e-207	0.846307	0.46	0.09	1.74515e-203	General endothelium
klf7b	1.15286e-206	0.834032	0.435	0.08	1.99432e-202	General endothelium
arap3	4.68741e-206	0.581279	0.37	0.055	8.10874e-202	General endothelium
dysf	4.3772e-204	0.444198	0.297	0.031	7.57212e-200	General endothelium
cnn2	1.80499e-200	1.03267	0.589	0.168	3.12246e-196	General endothelium
sept2	3.22696e-200	1.06246	0.606	0.181	5.58233e-196	General endothelium
tek	1.09897e-198	0.684622	0.411	0.072	1.9011e-194	General endothelium
adra1d	7.02626e-196	0.380138	0.24	0.019	1.21547e-191	General endothelium
mrc1a	1.64619e-194	0.370862	0.243	0.019	2.84774e-190	General endothelium
arhgef7b	1.11525e-193	0.463633	0.302	0.036	1.92926e-189	General endothelium
fli1b	1.25896e-191	0.963271	0.579	0.162	2.17787e-187	General endothelium
fstl1b	2.9486e-190	0.788046	0.488	0.113	5.10078e-186	General endothelium
pfn2l	1.03217e-188	0.932051	0.634	0.211	1.78556e-184	General endothelium
ccdc85b	3.88849e-188	0.611667	0.305	0.038	6.7267e-184	General endothelium
postnb	7.03002e-188	0.878892	0.446	0.088	1.21612e-183	General endothelium
sparc	2.6698e-187	0.875562	0.448	0.093	4.61848e-183	General endothelium
ecscr	5.49099e-186	0.516539	0.305	0.038	9.49886e-182	General endothelium
prcp	1.08834e-185	0.670821	0.369	0.063	1.88271e-181	General endothelium
cpn1.1	4.75941e-184	0.459488	0.234	0.019	8.2333e-180	General endothelium
smad3a	9.54668e-184	0.535972	0.352	0.056	1.65148e-179	General endothelium
tnfaip2b	2.78884e-182	0.40233	0.242	0.021	4.82441e-178	General endothelium
ctsla	4.62244e-182	1.05606	0.684	0.251	7.99637e-178	General endothelium
rac1a	2.97179e-181	0.833691	0.445	0.096	5.1409e-177	General endothelium
si:dkeyp-97a10.2	1.199e-180	0.704328	0.368	0.063	2.07415e-176	General endothelium
myo1cb	2.28462e-177	0.493197	0.361	0.062	3.95216e-173	General endothelium
arhgap27l	7.06892e-175	0.377672	0.252	0.026	1.22285e-170	General endothelium
amotl2a	2.26477e-174	0.799934	0.359	0.063	3.91782e-170	General endothelium
mmrn2b	2.54279e-174	0.359473	0.238	0.022	4.39878e-170	General endothelium
klf6a	3.62896e-174	1.28273	0.672	0.268	6.27774e-170	General endothelium
hnrnpa0a	1.0088e-172	1.01615	0.655	0.262	1.74512e-168	General endothelium
antxr1c	7.18682e-171	0.506944	0.323	0.049	1.24325e-166	General endothelium
asap1b	8.00975e-171	0.816423	0.462	0.113	1.38561e-166	General endothelium
pde4ba	2.06159e-170	0.551327	0.335	0.054	3.56635e-166	General endothelium
col4a2	9.02613e-170	0.402346	0.205	0.015	1.56143e-165	General endothelium
rnd3a	3.11888e-169	0.792631	0.342	0.059	5.39536e-165	General endothelium
gpm6ab	3.2269e-168	0.563784	0.223	0.02	5.58221e-164	General endothelium
ftr82	6.44787e-168	0.402	0.221	0.02	1.11542e-163	General endothelium
CT030188.1	1.47352e-166	0.841909	0.549	0.166	2.54905e-162	General endothelium
stox2a	4.42347e-166	0.42725	0.265	0.032	7.65217e-162	General endothelium
arhgef9b	3.38093e-164	0.472443	0.296	0.042	5.84867e-160	General endothelium
si:ch73-86n18.1	3.51551e-163	0.512333	0.292	0.042	6.08147e-159	General endothelium
nr2f1a	1.79246e-160	0.401698	0.235	0.025	3.10077e-156	General endothelium
s1pr1	1.23043e-159	0.33176	0.195	0.015	2.12852e-155	General endothelium
vat1	4.76981e-158	0.596939	0.309	0.051	8.25129e-154	General endothelium
pkp3b	5.82617e-158	0.365633	0.217	0.021	1.00787e-153	General endothelium
qkia	5.2041e-157	1.27232	0.891	0.645	9.00258e-153	General endothelium
NC-002333.17	6.56768e-157	0.884115	1	0.947	1.13614e-152	General endothelium
aplnra	2.83889e-155	0.49869	0.256	0.032	4.91099e-151	General endothelium
si:dkey-192g7.3	1.19196e-154	0.452091	0.243	0.029	2.06197e-150	General endothelium
pcdh12	1.79536e-153	0.263262	0.186	0.014	3.10579e-149	General endothelium
si:ch211-248e11.2	3.08336e-153	0.455023	0.261	0.034	5.3339e-149	General endothelium
tagln2	4.04367e-153	1.38232	0.64	0.254	6.99514e-149	General endothelium
ap1s3b	1.43294e-152	0.476413	0.284	0.041	2.47885e-148	General endothelium
cgnl1	1.54858e-151	0.89521	0.498	0.151	2.67888e-147	General endothelium
cald1a	2.45114e-151	0.539729	0.284	0.043	4.24023e-147	General endothelium
fhl3a	8.37821e-151	0.452014	0.316	0.055	1.44935e-146	General endothelium
CU570769.1	6.52038e-148	0.455859	0.258	0.035	1.12796e-143	General endothelium
sptbn1	1.4862e-147	0.419088	0.252	0.034	2.57098e-143	General endothelium
scarb2a	6.25491e-147	0.695346	0.41	0.102	1.08204e-142	General endothelium
xirp2a	1.66825e-145	0.300292	0.157	0.009	2.8859e-141	General endothelium
fam129ba	7.17604e-145	0.299887	0.211	0.022	1.24138e-140	General endothelium
notch1a	9.77706e-144	0.410067	0.275	0.042	1.69133e-139	General endothelium
calua	1.27488e-143	0.628612	0.36	0.077	2.20541e-139	General endothelium
wasf3b	6.34462e-143	0.741925	0.38	0.086	1.09756e-138	General endothelium
ftr83	1.16943e-142	0.312957	0.192	0.017	2.02299e-138	General endothelium
esama	3.61983e-142	0.643762	0.312	0.056	6.26195e-138	General endothelium
tgfb1a	3.48581e-141	0.39317	0.258	0.038	6.0301e-137	General endothelium
tead1b	6.96723e-141	0.603003	0.287	0.048	1.20526e-136	General endothelium
rab8b	2.28671e-140	0.693347	0.477	0.143	3.95578e-136	General endothelium
kank3	2.44989e-140	0.323749	0.209	0.023	4.23806e-136	General endothelium
sik1	1.92113e-139	0.651971	0.267	0.042	3.32336e-135	General endothelium
notchl	2.2242e-139	0.219868	0.128	0.004	3.84764e-135	General endothelium
cyr61l2	1.45479e-138	0.335775	0.158	0.01	2.51664e-134	General endothelium
stard8	8.87832e-138	0.49468	0.333	0.068	1.53586e-133	General endothelium
hmgb3a	2.74462e-137	0.639381	0.444	0.12	4.74792e-133	General endothelium
esm1	2.82648e-137	0.747043	0.192	0.019	4.88953e-133	General endothelium
tspan18b	7.39653e-137	0.592638	0.371	0.087	1.27953e-132	General endothelium
serpinh1a	1.43416e-136	0.509293	0.291	0.051	2.48095e-132	General endothelium
rgl1	2.08205e-135	0.521622	0.331	0.067	3.60174e-131	General endothelium
pim1	3.4252e-135	1.01285	0.564	0.215	5.92526e-131	General endothelium
rhoca	4.18363e-135	0.679123	0.412	0.107	7.23725e-131	General endothelium
il13ra2	6.40366e-134	0.367594	0.152	0.01	1.10777e-129	General endothelium
msna	4.25487e-133	1.27703	0.919	0.66	7.3605e-129	General endothelium
srgap2	1.11621e-132	0.497134	0.339	0.073	1.93093e-128	General endothelium
si:ch73-386h18.1	6.25177e-132	0.326134	0.237	0.033	1.08149e-127	General endothelium
ushbp1	1.68617e-131	0.356436	0.235	0.033	2.91691e-127	General endothelium
apc	2.96747e-131	0.529243	0.33	0.071	5.13343e-127	General endothelium
nrp2a	5.03225e-131	0.316462	0.213	0.026	8.70528e-127	General endothelium
ssuh2rs1	7.7394e-129	0.420756	0.257	0.042	1.33884e-124	General endothelium
ppp1r13ba	1.10905e-128	0.357001	0.211	0.026	1.91854e-124	General endothelium
actb2	2.53004e-128	1.06303	0.999	0.873	4.37672e-124	General endothelium
smo	1.22564e-127	0.390822	0.283	0.052	2.12023e-123	General endothelium
anxa13	6.52989e-127	0.303106	0.188	0.02	1.12961e-122	General endothelium
tubb5	1.35989e-125	0.397754	0.26	0.043	2.35248e-121	General endothelium
SH3TC1	3.77803e-125	0.247072	0.169	0.015	6.53562e-121	General endothelium
cavin2b	5.78963e-125	0.631884	0.293	0.056	1.00155e-120	General endothelium
add3a	8.81719e-125	0.482307	0.3	0.06	1.52529e-120	General endothelium
cdc42l	4.98229e-124	0.865557	0.632	0.284	8.61886e-120	General endothelium
fzd2	1.20004e-123	0.333271	0.242	0.038	2.07596e-119	General endothelium
ahnak	1.31946e-123	0.662648	0.415	0.116	2.28253e-119	General endothelium
CU927890.1	1.92731e-122	0.199884	0.142	0.01	3.33406e-118	General endothelium
shroom4	5.64068e-122	0.470125	0.306	0.065	9.75781e-118	General endothelium
hapln3	5.74128e-122	0.413258	0.158	0.013	9.93184e-118	General endothelium
CABZ01075125.1	1.9139e-121	0.38306	0.17	0.017	3.31085e-117	General endothelium
dab2ipb	2.25435e-121	0.250603	0.156	0.013	3.8998e-117	General endothelium
raraa	4.72511e-121	0.4066	0.195	0.024	8.17397e-117	General endothelium
arhgef12b	5.44312e-121	0.330332	0.238	0.037	9.41605e-117	General endothelium
sgk1	6.6587e-121	0.605738	0.34	0.081	1.15189e-116	General endothelium
tmem108	3.34984e-120	0.419699	0.245	0.041	5.79489e-116	General endothelium
foxc1a	5.65286e-119	0.360954	0.219	0.032	9.77888e-115	General endothelium
exoc3l1	3.16707e-118	0.239241	0.161	0.015	5.47871e-114	General endothelium
svild	7.86864e-118	0.443644	0.281	0.055	1.3612e-113	General endothelium
epha2a	1.90254e-117	0.270541	0.182	0.021	3.2912e-113	General endothelium
itga5	4.95788e-117	0.307973	0.211	0.03	8.57663e-113	General endothelium
cttnbp2nlb	1.40649e-116	0.217676	0.161	0.015	2.43309e-112	General endothelium
tpte	4.47515e-116	0.362772	0.258	0.046	7.74156e-112	General endothelium
lima1a	8.33839e-116	0.39935	0.24	0.04	1.44246e-111	General endothelium
lrrn1	1.76616e-114	0.309608	0.2	0.027	3.05528e-110	General endothelium
col4a1	2.32623e-114	0.264742	0.15	0.013	4.02415e-110	General endothelium
si:ch211-33e4.2	3.04098e-114	0.17909	0.108	0.004	5.26058e-110	General endothelium
calcrla	3.71162e-113	0.374118	0.21	0.03	6.42073e-109	General endothelium
plpp3	5.34552e-113	0.465133	0.308	0.07	9.24722e-109	General endothelium
exoc6	3.49286e-111	0.526559	0.383	0.11	6.0423e-107	General endothelium
lama4	1.37605e-109	0.369357	0.234	0.04	2.38044e-105	General endothelium
emp2	3.02606e-109	0.438112	0.274	0.056	5.23479e-105	General endothelium
nrarpa	3.61274e-109	0.452644	0.274	0.057	6.24968e-105	General endothelium
smad5	2.16464e-108	0.39532	0.295	0.066	3.7446e-104	General endothelium
jmjd1cb	1.12506e-107	0.508138	0.362	0.1	1.94624e-103	General endothelium
zgc:158463	1.759e-107	0.622103	1	0.917	3.0429e-103	General endothelium
si:ch211-66e2.3	7.61629e-107	0.217736	0.143	0.013	1.31754e-102	General endothelium
fgd5a	8.47944e-107	0.525849	0.372	0.108	1.46686e-102	General endothelium
fzd7a	1.76278e-106	0.370387	0.248	0.047	3.04944e-102	General endothelium
iqsec1b	1.82498e-105	0.265165	0.191	0.027	3.15703e-101	General endothelium
sox13	4.86032e-105	0.372064	0.202	0.031	8.40786e-101	General endothelium
pear1	1.92439e-104	0.159842	0.109	0.006	3.32901e-100	General endothelium
ebf3a	5.08587e-104	0.210259	0.159	0.018	8.79804e-100	General endothelium
Kaede	6.10518e-104	0.222665	0.128	0.01	1.05614e-99	General endothelium
zgc:174888	1.32485e-103	0.228408	0.156	0.017	2.29186e-99	General endothelium
cav1	2.22334e-102	0.351625	0.185	0.026	3.84615e-98	General endothelium
rap2c	2.24493e-102	0.405836	0.278	0.062	3.88351e-98	General endothelium
si:dkey-261h17.1	4.48542e-101	0.253958	0.176	0.023	7.75932e-97	General endothelium
plekhg5a	6.00859e-101	0.265312	0.174	0.023	1.03943e-96	General endothelium
plekhg2	5.96285e-100	0.230117	0.153	0.017	1.03151e-95	General endothelium
arhgap35a	7.62858e-100	0.293585	0.218	0.038	1.31967e-95	General endothelium
ildr2	9.40376e-100	0.541454	0.304	0.078	1.62676e-95	General endothelium
mcf2l2	2.56034e-99	0.175611	0.121	0.009	4.42913e-95	General endothelium
adgrl3.1	7.7682e-99	0.138667	0.097	0.004	1.34382e-94	General endothelium
rbpms2a	1.28755e-98	0.340672	0.217	0.038	2.22733e-94	General endothelium
gstt1b	4.31123e-98	0.188189	0.128	0.011	7.458e-94	General endothelium
tm4sf18	7.08893e-98	0.146886	0.094	0.004	1.22631e-93	General endothelium
nhsl2	7.4799e-98	0.170355	0.123	0.01	1.29395e-93	General endothelium
tmsb4x	1.12308e-97	0.561252	0.995	0.687	1.94281e-93	General endothelium
sash1b	1.28166e-97	0.181873	0.124	0.01	2.21715e-93	General endothelium
map4k2	1.84066e-97	0.247307	0.16	0.02	3.18415e-93	General endothelium
mafbb	2.90126e-97	0.58636	0.459	0.158	5.01889e-93	General endothelium
si:ch211-284f22.3	1.08511e-96	0.287871	0.183	0.027	1.87713e-92	General endothelium
ccdc80	5.91936e-95	0.165448	0.112	0.008	1.02399e-90	General endothelium
ddah2	1.04782e-94	0.344049	0.248	0.053	1.81262e-90	General endothelium
mbnl2	2.79979e-94	0.344063	0.236	0.048	4.84335e-90	General endothelium
pim3	7.45945e-93	0.372932	0.209	0.038	1.29041e-88	General endothelium
sypl2a	8.37168e-93	0.576839	0.396	0.134	1.44822e-88	General endothelium
shank3b	1.00616e-91	0.152574	0.114	0.009	1.74056e-87	General endothelium
micall2a	2.70361e-91	0.280992	0.181	0.028	4.67697e-87	General endothelium
mylk5	2.87937e-91	0.367246	0.196	0.034	4.98102e-87	General endothelium
tnfrsf19	2.92606e-91	0.229967	0.155	0.02	5.06179e-87	General endothelium
sh3gl3b	7.92936e-90	0.247653	0.149	0.019	1.3717e-85	General endothelium
dact2	1.11178e-89	0.25439	0.163	0.023	1.92326e-85	General endothelium
pard6gb	7.93586e-89	0.198558	0.149	0.019	1.37282e-84	General endothelium
hoxa3a	1.14303e-87	0.16191	0.104	0.007	1.97734e-83	General endothelium
prrg1	1.44459e-87	0.202314	0.15	0.02	2.49899e-83	General endothelium
marcksb	2.08297e-87	0.529707	0.384	0.129	3.60334e-83	General endothelium
zfp36l1b	6.75976e-87	0.305726	0.23	0.049	1.16937e-82	General endothelium
actb1	7.38918e-87	0.817136	1	0.951	1.27825e-82	General endothelium
serpinh1b	1.00509e-86	0.91975	0.231	0.05	1.73871e-82	General endothelium
trip10a	3.40236e-86	0.175145	0.134	0.015	5.88574e-82	General endothelium
pcdh2g17	3.98792e-86	0.245647	0.169	0.026	6.89871e-82	General endothelium
pora	1.35452e-85	0.343156	0.242	0.055	2.34319e-81	General endothelium
mtss1lb	2.58094e-85	0.124309	0.087	0.004	4.46476e-81	General endothelium
rapgef2	2.89916e-85	0.288172	0.19	0.034	5.01525e-81	General endothelium
sept9a	4.19745e-85	0.303305	0.169	0.027	7.26117e-81	General endothelium
myl12.1	5.25072e-85	1.01211	0.912	0.688	9.08322e-81	General endothelium
nid1b	5.51113e-85	0.403431	0.296	0.08	9.53371e-81	General endothelium
tuba8l3	1.06424e-84	0.695338	0.42	0.157	1.84102e-80	General endothelium
cmtm3	1.29656e-84	0.244414	0.175	0.029	2.24291e-80	General endothelium
macf1a	1.80295e-84	0.447398	0.356	0.116	3.11892e-80	General endothelium
zcchc24	6.51906e-84	0.24968	0.22	0.045	1.12773e-79	General endothelium
nkd1	2.75731e-83	0.414781	0.201	0.039	4.76987e-79	General endothelium
pls3	5.79498e-83	0.235523	0.185	0.033	1.00247e-78	General endothelium
clic4	6.32904e-83	0.342642	0.204	0.041	1.09486e-78	General endothelium
rnd1a	8.64976e-83	0.167361	0.108	0.009	1.49632e-78	General endothelium
dusp6	2.2394e-82	0.702216	0.372	0.13	3.87394e-78	General endothelium
frem1b	4.53681e-82	0.23568	0.178	0.031	7.84823e-78	General endothelium
fam43a	7.60338e-82	0.178444	0.138	0.017	1.31531e-77	General endothelium
tcf12	1.40256e-81	0.322968	0.181	0.032	2.4263e-77	General endothelium
sept10	9.58622e-81	0.360644	0.257	0.065	1.65832e-76	General endothelium
si:ch73-46j18.5	1.68399e-80	0.543112	0.394	0.146	2.91313e-76	General endothelium
pcdh17	6.51052e-80	0.176109	0.119	0.013	1.12625e-75	General endothelium
fkbp9	1.16077e-79	0.299861	0.261	0.065	2.00802e-75	General endothelium
snai1a	1.2641e-79	0.205687	0.165	0.027	2.18677e-75	General endothelium
appb	2.13686e-79	0.263374	0.191	0.037	3.69655e-75	General endothelium
mtmr8	4.21086e-79	0.355801	0.252	0.064	7.28437e-75	General endothelium
gpr156	6.98053e-79	0.125185	0.078	0.004	1.20756e-74	General endothelium
ier5l	1.41881e-78	0.327949	0.231	0.054	2.45439e-74	General endothelium
fgfr4	2.79605e-78	0.275129	0.203	0.042	4.83688e-74	General endothelium
foxo1a	3.02124e-78	0.246678	0.144	0.021	5.22644e-74	General endothelium
ppfibp1a	5.79104e-78	0.233546	0.152	0.023	1.00179e-73	General endothelium
arvcfb	1.29462e-77	0.221147	0.174	0.031	2.23957e-73	General endothelium
sema4c	5.3259e-77	0.145816	0.107	0.01	9.21327e-73	General endothelium
flt1	8.25546e-77	0.432684	0.135	0.018	1.42811e-72	General endothelium
lrch1	1.41208e-76	0.185692	0.13	0.017	2.44276e-72	General endothelium
fam198b	1.71392e-76	0.133637	0.095	0.007	2.96491e-72	General endothelium
cxcl12b	2.94511e-76	0.306021	0.192	0.038	5.09474e-72	General endothelium
pdzrn3b	3.09158e-76	0.168523	0.113	0.012	5.34813e-72	General endothelium
myct1b	4.05389e-76	0.189156	0.113	0.012	7.01283e-72	General endothelium
lnx2b	5.81445e-76	0.155302	0.109	0.011	1.00584e-71	General endothelium
marcksa	5.97497e-76	0.249331	0.177	0.033	1.03361e-71	General endothelium
rock2b.1	7.17604e-76	0.21248	0.143	0.021	1.24138e-71	General endothelium
palm1a	7.34816e-76	0.155535	0.104	0.01	1.27116e-71	General endothelium
tox2	8.86708e-76	0.162008	0.104	0.01	1.53392e-71	General endothelium
flrt2	9.18494e-76	0.154307	0.107	0.011	1.5889e-71	General endothelium
dll4	1.05799e-75	0.573187	0.164	0.029	1.83021e-71	General endothelium
rin3	1.10003e-75	0.35914	0.272	0.076	1.90295e-71	General endothelium
aplp2	1.45955e-75	0.330664	0.236	0.059	2.52488e-71	General endothelium
mgat1b	3.7511e-75	0.288818	0.218	0.05	6.48902e-71	General endothelium
tll1	5.55839e-74	0.129329	0.1	0.009	9.61545e-70	General endothelium
efna1a	9.17366e-74	0.185478	0.13	0.017	1.58695e-69	General endothelium
tmem176	3.18856e-73	0.190218	0.129	0.017	5.51588e-69	General endothelium
si:ch73-138n13.1	3.46344e-72	0.284888	0.23	0.058	5.99141e-68	General endothelium
gng7	7.69315e-72	0.150538	0.114	0.013	1.33084e-67	General endothelium
rbms1a	9.44959e-72	0.380144	0.24	0.064	1.63468e-67	General endothelium
hip1	1.22663e-71	0.224032	0.174	0.034	2.12195e-67	General endothelium
rab13	2.04823e-71	0.2785	0.198	0.044	3.54324e-67	General endothelium
stxbp6	2.42637e-71	0.268897	0.181	0.037	4.19738e-67	General endothelium
plk2a	4.84829e-71	0.104018	0.068	0.003	8.38705e-67	General endothelium
vwde	4.86091e-71	0.13851	0.068	0.003	8.4089e-67	General endothelium
si:ch73-22o12.1	1.4666e-70	0.262122	0.2	0.045	2.53708e-66	General endothelium
tgfbr2b	1.74093e-70	0.140074	0.106	0.011	3.01163e-66	General endothelium
cyfip1	1.88869e-70	0.444019	0.336	0.117	3.26724e-66	General endothelium
CR383676.1	2.84051e-70	1.36635	0.992	0.998	4.9138e-66	General endothelium
PKN2	3.97639e-70	0.163882	0.123	0.016	6.87875e-66	General endothelium
tln1	5.0833e-70	0.633678	0.486	0.23	8.7936e-66	General endothelium
sdc4	1.01222e-69	0.665612	0.4	0.163	1.75104e-65	General endothelium
flna	1.28532e-69	0.481098	0.316	0.106	2.22348e-65	General endothelium
tpd52l1	1.84768e-69	0.269441	0.158	0.029	3.19631e-65	General endothelium
foxp4	2.01545e-69	0.318206	0.246	0.066	3.48652e-65	General endothelium
abhd17b	2.12992e-69	0.202161	0.141	0.023	3.68455e-65	General endothelium
jag2b	2.66357e-69	0.169186	0.122	0.016	4.60771e-65	General endothelium
sptlc2a	6.35512e-69	0.308651	0.238	0.063	1.09937e-64	General endothelium
fgf18a	7.06098e-69	0.0951446	0.064	0.002	1.22148e-64	General endothelium
shroom2a	8.1932e-69	0.178228	0.13	0.019	1.41734e-64	General endothelium
dlc	1.70642e-68	0.26666	0.105	0.012	2.95193e-64	General endothelium
flrt3	2.07977e-68	0.284918	0.21	0.05	3.5978e-64	General endothelium
mdka	4.09e-68	0.362964	0.319	0.106	7.07528e-64	General endothelium
adma	4.95208e-68	0.130359	0.077	0.005	8.5666e-64	General endothelium
hyal2a	7.5024e-68	0.112107	0.08	0.006	1.29784e-63	General endothelium
s1pr5a	9.17386e-68	0.160755	0.111	0.013	1.58699e-63	General endothelium
frmd6	1.14675e-67	0.259526	0.155	0.028	1.98377e-63	General endothelium
zfpm2b	1.29893e-67	0.114043	0.076	0.005	2.24703e-63	General endothelium
limch1b	1.36075e-67	0.214814	0.116	0.015	2.35396e-63	General endothelium
hoxb3a	3.06838e-67	0.368429	0.169	0.034	5.30799e-63	General endothelium
fxyd6l	4.82701e-67	0.421184	0.28	0.089	8.35025e-63	General endothelium
ccnd2a	6.77359e-67	0.323891	0.196	0.046	1.17176e-62	General endothelium
lmbr1l	6.86732e-67	0.127854	0.095	0.009	1.18798e-62	General endothelium
acvrl1	9.60683e-67	0.133631	0.103	0.011	1.66189e-62	General endothelium
taok1a	1.09269e-66	0.263159	0.22	0.057	1.89024e-62	General endothelium
arhgap29b	1.27973e-66	0.392126	0.296	0.098	2.21381e-62	General endothelium
lgmn	2.14083e-66	0.7302	0.428	0.197	3.70341e-62	General endothelium
gstr	2.45941e-66	0.312374	0.202	0.049	4.25453e-62	General endothelium
myo7aa	3.28393e-66	0.159455	0.111	0.014	5.68087e-62	General endothelium
pcnx1	3.55301e-66	0.145327	0.115	0.015	6.14635e-62	General endothelium
jund	6.25141e-66	0.25929	0.186	0.042	1.08143e-61	General endothelium
nckap1	7.31666e-66	0.238884	0.2	0.047	1.26571e-61	General endothelium
capn2a	7.95176e-66	0.209644	0.159	0.031	1.37558e-61	General endothelium
prkd2	1.0498e-65	0.234714	0.218	0.056	1.81605e-61	General endothelium
pdgfba	1.15637e-65	0.12434	0.086	0.007	2.0004e-61	General endothelium
acsbg2	1.89293e-65	0.367867	0.313	0.108	3.27458e-61	General endothelium
vaspb	3.95411e-65	0.45722	0.362	0.141	6.84022e-61	General endothelium
myl6	1.08281e-64	0.500236	0.225	0.062	1.87315e-60	General endothelium
dsc2l	1.15144e-64	0.211692	0.155	0.03	1.99188e-60	General endothelium
wasla	1.93051e-64	0.194726	0.156	0.03	3.3396e-60	General endothelium
cxcl12a	2.17491e-64	0.281439	0.138	0.023	3.76238e-60	General endothelium
palm2.1	5.09573e-64	0.131291	0.088	0.008	8.8151e-60	General endothelium
ephb4a	5.75906e-64	0.103309	0.076	0.005	9.96259e-60	General endothelium
crip2	6.40763e-64	0.879368	0.444	0.211	1.10846e-59	General endothelium
ptprb	8.50758e-64	0.171439	0.115	0.016	1.47173e-59	General endothelium
lin28a	8.60869e-64	0.310938	0.231	0.064	1.48922e-59	General endothelium
dchs1b	9.51955e-64	0.136837	0.095	0.01	1.64679e-59	General endothelium
coro1cb	2.63734e-63	0.168358	0.126	0.02	4.56233e-59	General endothelium
crtap	2.92994e-63	0.249335	0.186	0.043	5.0685e-59	General endothelium
myl9a	3.13321e-63	0.176859	0.098	0.011	5.42014e-59	General endothelium
plk3	1.27506e-62	0.294661	0.219	0.059	2.20573e-58	General endothelium
dclk2a	1.29852e-61	0.146114	0.1	0.012	2.2463e-57	General endothelium
si:dkey-40c11.2	3.17074e-61	0.124901	0.09	0.009	5.48506e-57	General endothelium
mmp2	4.30784e-61	0.192322	0.167	0.036	7.45213e-57	General endothelium
EGFP	8.79055e-61	0.150466	0.096	0.011	1.52068e-56	General endothelium
plcg1	1.78778e-60	0.385083	0.275	0.092	3.09268e-56	General endothelium
btbd6b	2.62493e-60	0.241923	0.161	0.035	4.54087e-56	General endothelium
asap1a	2.81887e-60	0.170973	0.141	0.026	4.87637e-56	General endothelium
hspg2	4.5023e-60	0.121986	0.087	0.009	7.78853e-56	General endothelium
hpca	5.31385e-60	0.121462	0.088	0.009	9.19243e-56	General endothelium
psd2	9.71339e-60	0.200817	0.134	0.024	1.68032e-55	General endothelium
colec12	1.65926e-59	0.415161	0.243	0.074	2.87036e-55	General endothelium
camsap2b	1.71581e-59	0.171037	0.119	0.019	2.96818e-55	General endothelium
hoxb6a	2.75376e-59	0.269603	0.099	0.013	4.76374e-55	General endothelium
csrp1a	2.91276e-59	0.26264	0.24	0.072	5.03878e-55	General endothelium
si:ch211-43f4.1	5.42338e-59	0.118607	0.059	0.003	9.3819e-55	General endothelium
ctgfa	5.84128e-59	0.15637	0.105	0.014	1.01048e-54	General endothelium
piezo2a.2	6.11744e-59	0.133848	0.095	0.011	1.05826e-54	General endothelium
nos1apa	7.83497e-59	0.154839	0.119	0.019	1.35537e-54	General endothelium
bmp16	1.27167e-58	0.150966	0.094	0.011	2.19987e-54	General endothelium
rras2	1.30696e-58	0.148159	0.115	0.018	2.26092e-54	General endothelium
cep170aa	1.76236e-58	0.275356	0.208	0.057	3.04871e-54	General endothelium
mras	1.87713e-58	0.154408	0.121	0.02	3.24724e-54	General endothelium
ptbp1b	1.98489e-58	0.405115	0.356	0.147	3.43366e-54	General endothelium
npr1a	2.59171e-58	0.109452	0.081	0.008	4.4834e-54	General endothelium
plecb	3.10201e-58	0.349965	0.231	0.069	5.36618e-54	General endothelium
adam15	3.79472e-58	0.122941	0.091	0.011	6.56448e-54	General endothelium
arhgap31	4.22251e-58	0.117927	0.087	0.009	7.30452e-54	General endothelium
usp6nl	5.42272e-58	0.171309	0.147	0.03	9.38076e-54	General endothelium
tspan18a	2.31634e-57	0.193024	0.108	0.016	4.00703e-53	General endothelium
cst3	3.27926e-57	0.264412	0.233	0.07	5.6728e-53	General endothelium
dnmbp	4.51663e-57	0.165562	0.126	0.022	7.81332e-53	General endothelium
schip1	2.0019e-56	0.203073	0.157	0.035	3.46308e-52	General endothelium
rasgef1bb	2.43608e-56	0.133961	0.086	0.009	4.21417e-52	General endothelium
kdr	2.53635e-56	0.116043	0.084	0.009	4.38763e-52	General endothelium
mmrn2a	4.46174e-56	0.165046	0.114	0.018	7.71836e-52	General endothelium
meis2a.1	9.09704e-56	0.122027	0.09	0.011	1.5737e-51	General endothelium
mfng	9.79383e-56	0.230252	0.187	0.049	1.69423e-51	General endothelium
gnb2	2.29029e-55	0.107766	0.076	0.007	3.96197e-51	General endothelium
si:ch73-334d15.1	3.7902e-55	0.105392	0.078	0.008	6.55667e-51	General endothelium
arrb2b	4.82088e-55	0.52759	0.363	0.158	8.33965e-51	General endothelium
zgc:112332	4.99137e-55	0.180592	0.084	0.009	8.63457e-51	General endothelium
sox4a.1	8.29559e-55	0.24873	0.159	0.036	1.43505e-50	General endothelium
NC-002333.4	1.48239e-54	0.315733	1	1	2.56439e-50	General endothelium
dla	1.74232e-54	0.12536	0.103	0.015	3.01404e-50	General endothelium
cxcl20	2.16966e-54	0.0989174	0.071	0.006	3.75329e-50	General endothelium
yrk	2.63591e-54	0.619651	0.503	0.271	4.55987e-50	General endothelium
chp2	6.44442e-54	0.130637	0.08	0.009	1.11482e-49	General endothelium
rtn1a	1.24687e-53	0.172937	0.121	0.022	2.15696e-49	General endothelium
grb10a	5.47285e-53	0.224388	0.13	0.025	9.46749e-49	General endothelium
arhgap29a	5.60733e-53	0.0881549	0.067	0.005	9.70012e-49	General endothelium
zgc:92140	7.62405e-53	0.231582	0.161	0.039	1.31888e-48	General endothelium
zswim5	1.2539e-52	0.517322	0.45	0.239	2.16912e-48	General endothelium
jcada	1.25503e-52	0.157824	0.13	0.025	2.17107e-48	General endothelium
man1a1	2.6059e-52	0.20993	0.174	0.045	4.50795e-48	General endothelium
usp54a	3.19618e-52	0.141277	0.103	0.016	5.52908e-48	General endothelium
vegfc	3.86642e-52	0.142945	0.068	0.006	6.68851e-48	General endothelium
daam1a	6.01623e-52	0.108143	0.077	0.008	1.04075e-47	General endothelium
eppk1	8.33562e-52	0.163796	0.095	0.013	1.44198e-47	General endothelium
si:ch73-234b20.5	1.44198e-51	0.212135	0.203	0.059	2.49449e-47	General endothelium
cdc42ep1a	1.62172e-51	0.0750255	0.053	0.003	2.80542e-47	General endothelium
bmpr2a	2.25183e-51	0.118813	0.093	0.013	3.89545e-47	General endothelium
si:ch211-286o17.1	2.9653e-51	0.163799	0.16	0.038	5.12967e-47	General endothelium
mef2ca	3.69465e-51	0.233272	0.187	0.052	6.39138e-47	General endothelium
tgfbi	4.36063e-51	0.169592	0.168	0.042	7.54345e-47	General endothelium
nos1apa.1	5.37743e-51	0.229177	0.164	0.041	9.30242e-47	General endothelium
itga1	6.79756e-51	0.0953143	0.065	0.005	1.17591e-46	General endothelium
zgc:158343	8.08322e-51	0.288781	0.24	0.079	1.39832e-46	General endothelium
cfl1	8.70845e-51	0.678823	1	0.919	1.50647e-46	General endothelium
prex2	9.9323e-51	0.113392	0.087	0.011	1.71819e-46	General endothelium
si:ch211-145b13.6	1.11655e-50	0.202762	0.168	0.043	1.93152e-46	General endothelium
ctnnd1	1.67641e-50	0.231441	0.2	0.059	2.90002e-46	General endothelium
mrtfbb	1.73282e-50	0.127772	0.1	0.016	2.99761e-46	General endothelium
cyp1a	1.74414e-50	0.193663	0.098	0.015	3.01719e-46	General endothelium
lamp2	2.18589e-50	0.371636	0.304	0.123	3.78138e-46	General endothelium
hoxb1b	2.69349e-50	0.113824	0.061	0.005	4.65947e-46	General endothelium
si:zfos-2326c3.2	4.1374e-50	0.213524	0.168	0.043	7.15728e-46	General endothelium
foxd2	1.27503e-49	0.131892	0.086	0.011	2.20567e-45	General endothelium
f2rl2	1.42237e-49	0.0705942	0.038	0.001	2.46055e-45	General endothelium
atp2b2.1	1.48448e-49	0.522832	0.343	0.152	2.568e-45	General endothelium
dhrs3a	1.79465e-49	0.111299	0.053	0.003	3.10457e-45	General endothelium
klf2a	4.3396e-49	0.15983	0.09	0.013	7.50707e-45	General endothelium
dock1	4.63667e-49	0.113574	0.089	0.013	8.02098e-45	General endothelium
phactr4b	7.5656e-49	0.127172	0.096	0.015	1.30877e-44	General endothelium
agtr2	1.11174e-48	0.172989	0.119	0.023	1.9232e-44	General endothelium
prdm1a	1.45059e-48	0.249076	0.134	0.029	2.50938e-44	General endothelium
itga6b	1.47711e-48	0.125897	0.1	0.016	2.55524e-44	General endothelium
lamc1	1.544e-48	0.115314	0.085	0.011	2.67096e-44	General endothelium
b3gnt7	1.89018e-48	0.0950792	0.068	0.007	3.26982e-44	General endothelium
hoxb8a	2.04321e-48	0.309468	0.111	0.02	3.53454e-44	General endothelium
snx12	6.24109e-48	0.561905	0.423	0.226	1.07965e-43	General endothelium
meox1	9.07426e-48	0.160806	0.082	0.011	1.56976e-43	General endothelium
dhrs3b	2.75543e-47	0.326174	0.089	0.013	4.76662e-43	General endothelium
plod1a	3.44941e-47	0.250915	0.155	0.039	5.96713e-43	General endothelium
dock7	3.66671e-47	0.129784	0.102	0.017	6.34304e-43	General endothelium
il13ra1	4.01701e-47	0.18174	0.126	0.027	6.94903e-43	General endothelium
bcar1	4.12976e-47	0.144939	0.114	0.022	7.14408e-43	General endothelium
ZNF423	4.41513e-47	0.0961204	0.074	0.009	7.63774e-43	General endothelium
fam129bb	6.78813e-47	0.202439	0.159	0.042	1.17428e-42	General endothelium
cd276	8.6395e-47	0.202739	0.159	0.042	1.49455e-42	General endothelium
exoc3l2a	8.68162e-47	0.0883831	0.055	0.004	1.50183e-42	General endothelium
adcy2b	1.06913e-46	0.14597	0.113	0.022	1.84949e-42	General endothelium
cd99l2	1.20737e-46	0.358148	0.333	0.147	2.08864e-42	General endothelium
ogna	1.34319e-46	0.14171	0.088	0.013	2.32359e-42	General endothelium
ywhabl	1.45905e-46	0.900462	0.637	0.499	2.52401e-42	General endothelium
sgms1	1.72944e-46	0.160496	0.121	0.025	2.99177e-42	General endothelium
copz2	2.3815e-46	0.168303	0.126	0.027	4.11976e-42	General endothelium
gdi1	3.02089e-46	0.134034	0.108	0.02	5.22583e-42	General endothelium
gas6	3.37375e-46	0.122717	0.097	0.016	5.83626e-42	General endothelium
grk4	3.40389e-46	0.196833	0.177	0.051	5.88838e-42	General endothelium
arhgdia	4.33025e-46	0.703631	0.692	0.556	7.4909e-42	General endothelium
iqgap2	5.03838e-46	0.356184	0.271	0.106	8.7159e-42	General endothelium
vash2	5.43746e-46	0.161106	0.123	0.026	9.40626e-42	General endothelium
rabep2	5.98033e-46	0.137171	0.107	0.02	1.03454e-41	General endothelium
spock3	6.31116e-46	0.358648	0.173	0.049	1.09177e-41	General endothelium
fzd4	6.37706e-46	0.203172	0.109	0.021	1.10317e-41	General endothelium
foxn3	9.18702e-46	0.124527	0.099	0.017	1.58926e-41	General endothelium
spred1	1.05953e-45	0.121893	0.107	0.02	1.83287e-41	General endothelium
tns1b	1.11154e-45	0.139916	0.115	0.023	1.92285e-41	General endothelium
vamp5	1.49832e-45	0.664711	0.436	0.239	2.59194e-41	General endothelium
cxxc5b	1.57725e-45	0.15067	0.123	0.026	2.72848e-41	General endothelium
robo3	3.56374e-45	0.204441	0.141	0.034	6.16492e-41	General endothelium
amot	3.84281e-45	0.103839	0.077	0.01	6.64767e-41	General endothelium
slit3	4.26249e-45	0.207036	0.165	0.045	7.37368e-41	General endothelium
clip2	4.94749e-45	0.141167	0.123	0.027	8.55867e-41	General endothelium
arhgef1a	5.06441e-45	0.185306	0.168	0.047	8.76093e-41	General endothelium
rcan1a	8.6385e-45	0.210859	0.158	0.043	1.49437e-40	General endothelium
igf2bp1	9.15623e-45	0.672074	0.721	0.61	1.58394e-40	General endothelium
efna1b	1.07904e-44	0.186881	0.098	0.017	1.86662e-40	General endothelium
anxa3b	1.22858e-44	0.177391	0.158	0.042	2.12532e-40	General endothelium
si:ch211-51a6.2	1.41519e-44	0.0802987	0.058	0.005	2.44814e-40	General endothelium
spry2	5.20682e-44	0.194267	0.157	0.042	9.00729e-40	General endothelium
tjp1b	5.67105e-44	0.20328	0.157	0.043	9.81035e-40	General endothelium
selenop	5.91255e-44	0.122501	0.088	0.014	1.02281e-39	General endothelium
fkbp14	6.68988e-44	0.160162	0.13	0.03	1.15728e-39	General endothelium
PLEKHH3	7.43844e-44	0.156604	0.109	0.022	1.28678e-39	General endothelium
sbf2	1.0798e-43	0.0950467	0.072	0.009	1.86795e-39	General endothelium
phldb2b	1.09334e-43	0.12224	0.095	0.016	1.89137e-39	General endothelium
dspa	1.09453e-43	0.352606	0.237	0.088	1.89342e-39	General endothelium
appa	1.10799e-43	0.305463	0.273	0.109	1.91672e-39	General endothelium
mex3b	1.11786e-43	0.126519	0.106	0.02	1.93378e-39	General endothelium
cd151l	1.20902e-43	0.182092	0.166	0.047	2.09148e-39	General endothelium
notch1b	1.29379e-43	0.130918	0.084	0.013	2.23813e-39	General endothelium
stard9	1.49682e-43	0.127073	0.097	0.017	2.58934e-39	General endothelium
si:ch211-250c4.4	1.90014e-43	0.118145	0.068	0.008	3.28706e-39	General endothelium
sult2st1	2.73453e-43	0.295796	0.254	0.095	4.73047e-39	General endothelium
znf644b	2.80438e-43	0.0657328	0.042	0.002	4.85129e-39	General endothelium
tnfsf10	2.80656e-43	0.0750304	0.05	0.003	4.85506e-39	General endothelium
dap1b	3.52565e-43	0.327945	0.221	0.079	6.09902e-39	General endothelium
ghrb	3.65037e-43	0.107431	0.08	0.012	6.31477e-39	General endothelium
cacnb2a	3.65991e-43	0.0712901	0.053	0.004	6.33129e-39	General endothelium
csrp2	4.27098e-43	0.302035	0.116	0.025	7.38837e-39	General endothelium
cxxc5a	4.51461e-43	0.167042	0.116	0.025	7.80983e-39	General endothelium
ccdc102a	4.53079e-43	0.107965	0.088	0.014	7.83781e-39	General endothelium
gcnt4a	6.38112e-43	0.268227	0.251	0.095	1.10387e-38	General endothelium
ckba	1.14458e-42	0.217414	0.142	0.037	1.98e-38	General endothelium
luzp1	1.17099e-42	0.13721	0.107	0.022	2.02569e-38	General endothelium
tle2a	1.23993e-42	0.219122	0.176	0.053	2.14495e-38	General endothelium
clul1	1.32456e-42	0.101422	0.073	0.01	2.29136e-38	General endothelium
lrig2	1.50277e-42	0.143772	0.129	0.03	2.59964e-38	General endothelium
si:ch211-195o20.7	1.60074e-42	0.120254	0.099	0.018	2.76911e-38	General endothelium
mfap2	2.67956e-42	0.264018	0.187	0.059	4.63538e-38	General endothelium
zgc:100829	8.68323e-42	0.277007	0.211	0.074	1.50211e-37	General endothelium
palm1b	1.11426e-41	0.181556	0.129	0.031	1.92757e-37	General endothelium
fev	1.3273e-41	0.0776723	0.059	0.006	2.29609e-37	General endothelium
pbx4	1.68763e-41	0.38548	0.366	0.181	2.91944e-37	General endothelium
podxl	2.35572e-41	0.579067	0.322	0.153	4.07516e-37	General endothelium
caskin1	4.96418e-41	0.06487	0.049	0.004	8.58754e-37	General endothelium
ephb4b	9.17784e-41	0.108832	0.086	0.014	1.58767e-36	General endothelium
nrp1a	1.6711e-40	0.14451	0.104	0.021	2.89084e-36	General endothelium
dnmt3ab	2.41038e-40	0.123052	0.102	0.02	4.16971e-36	General endothelium
magi1b	2.68323e-40	0.147672	0.105	0.022	4.64173e-36	General endothelium
si:dkey-195m11.8	5.16464e-40	0.224102	0.149	0.042	8.93432e-36	General endothelium
greb1l	5.53167e-40	0.122807	0.084	0.014	9.56924e-36	General endothelium
plekhg5b	1.10139e-39	0.10323	0.09	0.016	1.9053e-35	General endothelium
dpysl3	1.25464e-39	0.072175	0.047	0.004	2.1704e-35	General endothelium
prex1	2.88783e-39	0.129046	0.106	0.023	4.99566e-35	General endothelium
snap23.1	3.33408e-39	0.374162	0.298	0.137	5.76762e-35	General endothelium
myh9b	4.4665e-39	0.289106	0.261	0.108	7.7266e-35	General endothelium
sh3bp5a	4.75177e-39	0.0917912	0.071	0.01	8.22008e-35	General endothelium
rbfox2	5.13489e-39	0.179838	0.174	0.055	8.88285e-35	General endothelium
col8a2	1.57066e-38	0.104658	0.071	0.01	2.71709e-34	General endothelium
gas1b	2.44312e-38	0.110904	0.087	0.016	4.22635e-34	General endothelium
CT027815.1	3.00137e-38	0.114408	0.106	0.023	5.19207e-34	General endothelium
lpar2a	4.0865e-38	0.182866	0.133	0.036	7.06924e-34	General endothelium
mafa	4.38772e-38	0.108784	0.111	0.025	7.59031e-34	General endothelium
wls	4.81459e-38	0.186045	0.168	0.053	8.32875e-34	General endothelium
zbtb16a	5.45862e-38	0.577585	0.477	0.297	9.44286e-34	General endothelium
hey2	6.7123e-38	0.422237	0.113	0.027	1.16116e-33	General endothelium
sh3tc2	6.75047e-38	0.0798605	0.06	0.007	1.16776e-33	General endothelium
rab11fip3	7.08304e-38	0.0748266	0.059	0.007	1.22529e-33	General endothelium
cfap58	7.51256e-38	0.075701	0.055	0.006	1.2996e-33	General endothelium
abi1a	9.53604e-38	0.221555	0.219	0.083	1.64964e-33	General endothelium
BX284638.1	1.94027e-37	0.106882	0.081	0.014	3.35648e-33	General endothelium
git1	2.79216e-37	0.117747	0.096	0.02	4.83016e-33	General endothelium
nr5a2	2.89785e-37	0.0905651	0.044	0.003	5.01299e-33	General endothelium
nav2b	7.95611e-37	0.104987	0.08	0.014	1.37633e-32	General endothelium
dse	9.2335e-37	0.0813824	0.069	0.01	1.5973e-32	General endothelium
ehd2b	1.01485e-36	0.0975045	0.046	0.004	1.75558e-32	General endothelium
igf2b	1.01775e-36	0.163303	0.112	0.027	1.7606e-32	General endothelium
dpysl2b	1.10441e-36	0.0737281	0.058	0.007	1.91052e-32	General endothelium
marveld1	1.15812e-36	0.138938	0.108	0.025	2.00343e-32	General endothelium
dock6	2.37806e-36	0.104172	0.079	0.014	4.11381e-32	General endothelium
adh8b	4.3996e-36	0.13961	0.098	0.021	7.61087e-32	General endothelium
mafba	5.91975e-36	0.21341	0.284	0.121	1.02406e-31	General endothelium
sntb2	5.94794e-36	0.209941	0.201	0.074	1.02893e-31	General endothelium
hvcn1	7.34397e-36	0.186557	0.161	0.052	1.27043e-31	General endothelium
ptk2ab	9.30134e-36	0.0939414	0.07	0.011	1.60904e-31	General endothelium
ywhaqa	1.06498e-35	0.545148	0.508	0.342	1.84231e-31	General endothelium
ppp1r9alb	1.35275e-35	0.15596	0.09	0.018	2.34013e-31	General endothelium
CABZ01099847.1	1.64694e-35	0.0737281	0.056	0.007	2.84904e-31	General endothelium
zfyve21	1.68593e-35	0.161107	0.129	0.035	2.91649e-31	General endothelium
mink1	1.88784e-35	0.0816043	0.062	0.008	3.26577e-31	General endothelium
BX284635.1	3.5853e-35	0.0800775	0.064	0.009	6.20221e-31	General endothelium
CABZ01080702.1	4.33532e-35	0.143956	0.128	0.035	7.49968e-31	General endothelium
sesn3	4.71419e-35	0.176504	0.108	0.026	8.15508e-31	General endothelium
arhgef10	5.35519e-35	0.0713168	0.058	0.007	9.26394e-31	General endothelium
smad1	9.19522e-35	0.171927	0.134	0.038	1.59068e-30	General endothelium
hbegfa	9.4864e-35	0.271016	0.205	0.078	1.64105e-30	General endothelium
nr2f6b	1.1345e-34	0.143391	0.099	0.022	1.96257e-30	General endothelium
arhgap23a	1.93312e-34	0.100898	0.085	0.017	3.34411e-30	General endothelium
lhfpl2a	2.75952e-34	0.12983	0.125	0.034	4.77369e-30	General endothelium
kifap3b	2.87506e-34	0.0682252	0.054	0.006	4.97356e-30	General endothelium
cxcr4a	3.56479e-34	0.324476	0.061	0.009	6.16673e-30	General endothelium
rbms2a	4.51152e-34	0.124542	0.106	0.026	7.80448e-30	General endothelium
hspa12a	4.55687e-34	0.144295	0.098	0.022	7.88293e-30	General endothelium
afap1l1a	4.7152e-34	0.0642121	0.044	0.004	8.15682e-30	General endothelium
myo1b	5.08363e-34	0.0987368	0.087	0.018	8.79417e-30	General endothelium
p3h1	5.35914e-34	0.161091	0.141	0.042	9.27077e-30	General endothelium
si:dkey-56m19.5	5.83234e-34	0.231329	0.204	0.078	1.00894e-29	General endothelium
BX511259.1	6.70116e-34	0.0467208	0.029	0.001	1.15923e-29	General endothelium
sept7a	7.95179e-34	0.414458	0.381	0.215	1.37558e-29	General endothelium
kif13ba	1.05409e-33	0.262875	0.208	0.082	1.82348e-29	General endothelium
si:ch211-71n6.4	1.14046e-33	0.0765888	0.063	0.009	1.97287e-29	General endothelium
lzts2a	1.32168e-33	0.0765823	0.059	0.008	2.28637e-29	General endothelium
capns1b	1.38165e-33	0.562354	0.403	0.24	2.39012e-29	General endothelium
tpcn3	1.46976e-33	0.081596	0.07	0.012	2.54253e-29	General endothelium
pxdc1b	1.60201e-33	0.0889618	0.071	0.012	2.77132e-29	General endothelium
zeb1b	1.79554e-33	0.183741	0.146	0.045	3.10611e-29	General endothelium
phf20a	2.18333e-33	0.0912942	0.079	0.015	3.77694e-29	General endothelium
pgrmc1	2.32796e-33	0.34012	0.293	0.143	4.02714e-29	General endothelium
hoxb2a	2.49795e-33	0.0743728	0.044	0.004	4.32121e-29	General endothelium
kif26aa	3.25912e-33	0.0523474	0.032	0.001	5.63795e-29	General endothelium
tnrc6c2	3.64625e-33	0.132056	0.113	0.029	6.30766e-29	General endothelium
asap2a	3.96659e-33	0.0765823	0.059	0.008	6.86181e-29	General endothelium
celsr1a	6.50117e-33	0.120225	0.112	0.029	1.12464e-28	General endothelium
adora2b	6.60978e-33	0.0555322	0.042	0.004	1.14343e-28	General endothelium
tcf20	8.63246e-33	0.0972257	0.087	0.018	1.49333e-28	General endothelium
rasal2	1.00013e-32	0.165417	0.125	0.036	1.73012e-28	General endothelium
rhocb	1.32449e-32	0.699227	0.533	0.395	2.29124e-28	General endothelium
anxa11b	1.37382e-32	0.363884	0.296	0.145	2.37658e-28	General endothelium
rbpms2b	1.55372e-32	0.16977	0.104	0.026	2.68778e-28	General endothelium
fam83hb	1.83414e-32	0.107503	0.082	0.017	3.17288e-28	General endothelium
dbn1	2.27756e-32	0.091586	0.06	0.009	3.93995e-28	General endothelium
si:ch73-364h19.1	2.537e-32	0.137892	0.086	0.018	4.38876e-28	General endothelium
bahcc1b	3.38535e-32	0.23446	0.192	0.073	5.85632e-28	General endothelium
rab3il1	3.71208e-32	0.140305	0.125	0.036	6.42153e-28	General endothelium
cd81b	3.75698e-32	0.042208	0.027	0.001	6.49919e-28	General endothelium
kazald2	4.06673e-32	0.0530928	0.042	0.004	7.03503e-28	General endothelium
krt18b	4.6489e-32	0.185356	0.322	0.153	8.04212e-28	General endothelium
kif7	4.83801e-32	0.0763675	0.061	0.009	8.36927e-28	General endothelium
fam129ab	6.40242e-32	0.137574	0.119	0.033	1.10755e-27	General endothelium
fermt2	7.38917e-32	0.0640263	0.051	0.006	1.27825e-27	General endothelium
cox4i2	8.60936e-32	0.107707	0.059	0.009	1.48933e-27	General endothelium
arhgap35b	9.00533e-32	0.0893558	0.079	0.016	1.55783e-27	General endothelium
fzd7b	9.98317e-32	0.123822	0.099	0.024	1.72699e-27	General endothelium
myo6b	1.04402e-31	0.0743952	0.059	0.009	1.80606e-27	General endothelium
slc12a2	1.08045e-31	0.155714	0.151	0.05	1.86908e-27	General endothelium
dgkza	1.22691e-31	0.136055	0.129	0.038	2.12243e-27	General endothelium
ginm1	1.40772e-31	0.289714	0.299	0.149	2.43521e-27	General endothelium
tp53inp2	1.41449e-31	0.260214	0.173	0.063	2.44693e-27	General endothelium
kif1b	2.97801e-31	0.107316	0.103	0.026	5.15166e-27	General endothelium
dtx2	4.11217e-31	0.142323	0.109	0.029	7.11364e-27	General endothelium
si:dkey-237i9.8	5.27244e-31	0.0508405	0.04	0.003	9.12079e-27	General endothelium
znf609b	5.36016e-31	0.221924	0.266	0.123	9.27254e-27	General endothelium
oaz2a	5.61035e-31	0.17592	0.086	0.019	9.70535e-27	General endothelium
cyth1a.1	6.71278e-31	0.283458	0.214	0.091	1.16124e-26	General endothelium
bcl9	6.75466e-31	0.0929035	0.093	0.022	1.16849e-26	General endothelium
pitpnbl	1.01985e-30	0.204569	0.194	0.077	1.76425e-26	General endothelium
sox11a	1.09666e-30	0.145687	0.107	0.028	1.89712e-26	General endothelium
dcbld1	1.84439e-30	0.123776	0.097	0.024	3.19062e-26	General endothelium
pfn2	1.88015e-30	0.673039	0.573	0.448	3.25248e-26	General endothelium
foxf2a	2.73467e-30	0.0848915	0.04	0.004	4.73071e-26	General endothelium
nrip1b	3.61273e-30	0.126421	0.113	0.032	6.24966e-26	General endothelium
meis1b	3.85267e-30	0.186352	0.14	0.045	6.66473e-26	General endothelium
tax1bp3	4.01008e-30	0.204645	0.223	0.095	6.93704e-26	General endothelium
rell1	4.16313e-30	0.160274	0.151	0.052	7.2018e-26	General endothelium
gsna	4.51338e-30	0.0843978	0.073	0.014	7.80769e-26	General endothelium
nfia	5.63245e-30	0.0699758	0.045	0.005	9.74358e-26	General endothelium
frmd4ba	5.81406e-30	0.141496	0.137	0.044	1.00577e-25	General endothelium
CR751602.2	6.03593e-30	0.0584775	0.043	0.004	1.04416e-25	General endothelium
arhgef40	6.16415e-30	0.0564596	0.044	0.005	1.06634e-25	General endothelium
lamb1b	7.44587e-30	0.0902558	0.064	0.011	1.28806e-25	General endothelium
tpm3	7.93025e-30	0.638456	0.623	0.508	1.37185e-25	General endothelium
hmcn1	1.18564e-29	0.0704334	0.05	0.006	2.05104e-25	General endothelium
smad7	1.48187e-29	0.132215	0.122	0.037	2.56348e-25	General endothelium
amer2	1.65027e-29	0.041809	0.03	0.002	2.85481e-25	General endothelium
emd	2.07663e-29	0.196587	0.153	0.054	3.59237e-25	General endothelium
serpinh2	2.31165e-29	0.0844178	0.065	0.012	3.99892e-25	General endothelium
erfl3	2.55224e-29	0.244574	0.158	0.057	4.41512e-25	General endothelium
slc4a2a	2.60106e-29	0.0744118	0.065	0.012	4.49957e-25	General endothelium
nck1a	2.61592e-29	0.155521	0.135	0.044	4.52528e-25	General endothelium
ube2e2	4.61388e-29	0.170612	0.158	0.057	7.98155e-25	General endothelium
slc43a1b	6.54342e-29	0.0708799	0.052	0.007	1.13195e-24	General endothelium
si:ch73-116o1.2	6.59718e-29	0.0580399	0.047	0.006	1.14125e-24	General endothelium
si:ch1073-291c23.2	6.76048e-29	0.0867666	0.07	0.014	1.16949e-24	General endothelium
ppp2r2d	7.76136e-29	0.163326	0.152	0.054	1.34264e-24	General endothelium
zgc:195173	8.08646e-29	0.0577509	0.035	0.003	1.39888e-24	General endothelium
eef1a1l1	8.28866e-29	0.0803934	1	1	1.43386e-24	General endothelium
pskh1	1.20485e-28	0.067172	0.059	0.01	2.08427e-24	General endothelium
vav2	1.37799e-28	0.0673638	0.053	0.008	2.38379e-24	General endothelium
dennd2db	1.56991e-28	0.0842052	0.063	0.011	2.71578e-24	General endothelium
aebp1	1.93844e-28	0.0988568	0.061	0.011	3.3533e-24	General endothelium
peak1	2.21538e-28	0.0789908	0.069	0.013	3.83238e-24	General endothelium
arhgap5	2.67343e-28	0.180371	0.165	0.062	4.62478e-24	General endothelium
ralgapa2	2.83656e-28	0.193364	0.181	0.072	4.90697e-24	General endothelium
crim1	2.88406e-28	0.0504018	0.038	0.004	4.98913e-24	General endothelium
ttyh2	3.0595e-28	0.0589153	0.045	0.005	5.29262e-24	General endothelium
myca	3.34867e-28	0.250613	0.087	0.021	5.79286e-24	General endothelium
ctnna1	3.85472e-28	0.246202	0.21	0.092	6.66828e-24	General endothelium
ppiaa	4.17498e-28	0.485213	1	0.954	7.22231e-24	General endothelium
elovl1a	4.67101e-28	0.0711165	0.055	0.009	8.08039e-24	General endothelium
fam107b	6.5009e-28	0.28164	0.309	0.161	1.12459e-23	General endothelium
sh3pxd2b	1.23429e-27	0.130312	0.117	0.036	2.13519e-23	General endothelium
nxn	1.37455e-27	0.14446	0.094	0.025	2.37783e-23	General endothelium
bahcc1a	1.46705e-27	0.0833272	0.067	0.013	2.53785e-23	General endothelium
ier2a	1.50189e-27	0.642818	0.541	0.397	2.59811e-23	General endothelium
rasgrp3	1.73504e-27	0.0971008	0.059	0.01	3.00144e-23	General endothelium
zgc:171558	1.79996e-27	0.0342854	0.024	0.001	3.11375e-23	General endothelium
cdc42bpaa	1.8597e-27	0.0785544	0.063	0.012	3.21709e-23	General endothelium
cav2	2.4627e-27	0.093274	0.061	0.011	4.26023e-23	General endothelium
map1sb	2.75848e-27	0.0329156	0.023	0.001	4.77189e-23	General endothelium
amh	3.01842e-27	0.0413284	0.027	0.001	5.22157e-23	General endothelium
slc22a16	3.36961e-27	0.0425082	0.032	0.002	5.8291e-23	General endothelium
ccdc187	3.55339e-27	0.250653	0.205	0.091	6.14702e-23	General endothelium
tmem176l.1	3.6282e-27	0.0994565	0.091	0.024	6.27642e-23	General endothelium
hoxb5b	5.08753e-27	0.0822672	0.037	0.004	8.80091e-23	General endothelium
eva1ba	6.82496e-27	0.0750694	0.061	0.011	1.18065e-22	General endothelium
syne1a	6.95039e-27	0.0848364	0.068	0.014	1.20235e-22	General endothelium
tle3b	7.1523e-27	0.18275	0.157	0.059	1.23728e-22	General endothelium
zgc:158659	7.56717e-27	0.0365801	0.026	0.001	1.30905e-22	General endothelium
rps6ka3b	7.6936e-27	0.0880569	0.073	0.016	1.33092e-22	General endothelium
trim3a	8.19588e-27	0.0914368	0.082	0.02	1.4178e-22	General endothelium
lasp1	8.52909e-27	0.403408	0.412	0.264	1.47545e-22	General endothelium
hyal2b	9.51439e-27	0.140094	0.12	0.038	1.64589e-22	General endothelium
sec61g	1.51769e-26	0.309999	0.42	0.706	2.62545e-22	General endothelium
apof	1.5582e-26	0.0524061	0.035	0.003	2.69553e-22	General endothelium
hoxb5a	1.63216e-26	0.0794234	0.043	0.005	2.82347e-22	General endothelium
si:ch211-166a6.5	2.44427e-26	0.148307	0.149	0.055	4.22835e-22	General endothelium
si:dkey-19b23.8	2.90501e-26	0.0770218	0.052	0.008	5.02538e-22	General endothelium
ctdsp2	3.5551e-26	0.227579	0.188	0.081	6.14997e-22	General endothelium
tor4aa	4.14712e-26	0.119585	0.105	0.031	7.1741e-22	General endothelium
elk3	4.7662e-26	0.0897785	0.072	0.016	8.24506e-22	General endothelium
myo10l3	5.29195e-26	0.0778966	0.051	0.008	9.15454e-22	General endothelium
adra1aa	6.3895e-26	0.0311041	0.023	0.001	1.10532e-21	General endothelium
tshz3b	6.47509e-26	0.0567032	0.043	0.005	1.12013e-21	General endothelium
FAT4	8.41615e-26	0.0942693	0.072	0.016	1.45591e-21	General endothelium
tns3.2	9.4735e-26	0.0474848	0.036	0.004	1.63882e-21	General endothelium
crybg1a	1.05652e-25	0.125166	0.098	0.028	1.82767e-21	General endothelium
ppib	1.18398e-25	0.488789	0.668	0.586	2.04817e-21	General endothelium
klhl4	1.28249e-25	0.0649642	0.053	0.009	2.21858e-21	General endothelium
tspan7	1.35375e-25	0.297547	0.251	0.126	2.34185e-21	General endothelium
fer	1.48904e-25	0.0638748	0.056	0.01	2.57589e-21	General endothelium
aqp11	1.60343e-25	0.0629329	0.047	0.007	2.77377e-21	General endothelium
nfkbiab	1.72856e-25	0.228848	0.195	0.085	2.99024e-21	General endothelium
enc3	1.85311e-25	0.074177	0.05	0.008	3.20569e-21	General endothelium
plxnb3	2.15644e-25	0.0520267	0.043	0.006	3.73042e-21	General endothelium
diaph2	2.56343e-25	0.120788	0.122	0.041	4.43448e-21	General endothelium
ripor1	2.79228e-25	0.0686977	0.053	0.009	4.83036e-21	General endothelium
tmem204	3.60845e-25	0.0580168	0.04	0.005	6.24225e-21	General endothelium
marveld2a	3.67834e-25	0.0809417	0.07	0.016	6.36316e-21	General endothelium
tjp2b	7.40426e-25	0.112804	0.093	0.026	1.28086e-20	General endothelium
ppfibp1b	9.23019e-25	0.0735355	0.059	0.011	1.59673e-20	General endothelium
slkb	9.75985e-25	0.0934765	0.09	0.025	1.68836e-20	General endothelium
sult6b1	1.03481e-24	0.43289	0.286	0.156	1.79013e-20	General endothelium
cmtm8b	1.16548e-24	0.0436451	0.033	0.003	2.01617e-20	General endothelium
znf503	1.23673e-24	0.0912336	0.077	0.019	2.13941e-20	General endothelium
rarga	1.4225e-24	0.11195	0.091	0.026	2.46078e-20	General endothelium
tmem198b	1.52716e-24	0.0779076	0.068	0.015	2.64183e-20	General endothelium
bicd2	1.73307e-24	0.0463886	0.037	0.004	2.99804e-20	General endothelium
map7d1a	1.76624e-24	0.0893355	0.073	0.017	3.05542e-20	General endothelium
rassf4	3.02862e-24	0.0411502	0.03	0.003	5.23921e-20	General endothelium
si:ch211-222k6.3	3.28541e-24	0.0835238	0.073	0.018	5.68342e-20	General endothelium
lef1	4.2999e-24	0.0620212	0.04	0.005	7.43839e-20	General endothelium
gpc4	4.96596e-24	0.102917	0.078	0.02	8.59062e-20	General endothelium
creb3l2	5.40563e-24	0.105531	0.105	0.033	9.3512e-20	General endothelium
cbx6a	5.41087e-24	0.0933618	0.08	0.021	9.36026e-20	General endothelium
slc40a1	6.78664e-24	0.103629	0.122	0.042	1.17402e-19	General endothelium
si:ch73-335l21.4	7.44197e-24	0.376605	0.111	0.037	1.28739e-19	General endothelium
itga9	9.94667e-24	0.103482	0.093	0.027	1.72067e-19	General endothelium
ankrd11	1.26944e-23	0.492638	0.442	0.318	2.19601e-19	General endothelium
ralba	1.3658e-23	0.312567	0.292	0.166	2.3627e-19	General endothelium
atp1b1a	1.47043e-23	0.50403	0.534	0.416	2.54369e-19	General endothelium
ccng2	1.4789e-23	0.188368	0.169	0.071	2.55836e-19	General endothelium
snx22	1.48838e-23	0.0513401	0.04	0.005	2.57475e-19	General endothelium
slco5a1a	2.31234e-23	0.0400528	0.032	0.003	4.00011e-19	General endothelium
kifc3	2.40592e-23	0.0640926	0.054	0.01	4.162e-19	General endothelium
etv5b	2.49219e-23	0.119766	0.104	0.033	4.31124e-19	General endothelium
lhfpl2b	2.67692e-23	0.101872	0.093	0.027	4.6308e-19	General endothelium
sh3gl1b	3.08069e-23	0.105717	0.109	0.036	5.32929e-19	General endothelium
mfhas1	3.28093e-23	0.0591999	0.049	0.008	5.67568e-19	General endothelium
smurf2	3.44758e-23	0.120366	0.12	0.042	5.96397e-19	General endothelium
ndnf	3.54967e-23	0.289969	0.097	0.03	6.14058e-19	General endothelium
atf5b	3.76943e-23	0.0748571	0.062	0.013	6.52073e-19	General endothelium
lix1l	4.36036e-23	0.0616603	0.053	0.01	7.54298e-19	General endothelium
sh3bp4a	4.63174e-23	0.0903941	0.076	0.019	8.01245e-19	General endothelium
arpc4l	4.72365e-23	0.292981	0.394	0.242	8.17144e-19	General endothelium
si:dkey-68o6.5	5.07574e-23	0.082866	0.08	0.021	8.78053e-19	General endothelium
si:dkeyp-14d3.1	6.70963e-23	0.0375053	0.026	0.002	1.1607e-18	General endothelium
rgs4	7.31116e-23	0.0334058	0.024	0.001	1.26476e-18	General endothelium
erg	8.65487e-23	0.0404917	0.03	0.003	1.49721e-18	General endothelium
DOCK9	1.11414e-22	0.0456948	0.034	0.004	1.92735e-18	General endothelium
SCARF2	1.12504e-22	0.0429869	0.033	0.004	1.94621e-18	General endothelium
zic2a	1.16276e-22	0.108585	0.055	0.011	2.01147e-18	General endothelium
si:ch211-212g7.6	1.27715e-22	0.0744284	0.064	0.015	2.20935e-18	General endothelium
slc25a24	1.44674e-22	0.142455	0.106	0.035	2.50271e-18	General endothelium
aqp7	1.46203e-22	0.0587857	0.051	0.009	2.52917e-18	General endothelium
prox1b	1.49677e-22	0.0796421	0.073	0.019	2.58926e-18	General endothelium
znf516	1.51126e-22	0.0551984	0.045	0.007	2.61433e-18	General endothelium
ctnnb2	1.92668e-22	0.299138	0.289	0.164	3.33297e-18	General endothelium
lmf2b	1.98836e-22	0.104454	0.115	0.04	3.43967e-18	General endothelium
ndel1b	2.07226e-22	0.130828	0.088	0.026	3.58481e-18	General endothelium
isg15	2.27436e-22	0.0535032	0.028	0.002	3.93442e-18	General endothelium
adgrl4	2.47209e-22	0.185551	0.177	0.079	4.27646e-18	General endothelium
neurl1aa	2.51519e-22	0.0592216	0.05	0.009	4.35103e-18	General endothelium
slc22a7b.1	2.63583e-22	0.101704	0.074	0.019	4.55973e-18	General endothelium
hspb15	3.40314e-22	0.0371119	0.029	0.003	5.8871e-18	General endothelium
eogt	4.78229e-22	0.0357011	0.026	0.002	8.27288e-18	General endothelium
nucks1a	4.83879e-22	0.478984	0.467	0.336	8.37062e-18	General endothelium
fam83ha	5.16454e-22	0.0304444	0.021	0.001	8.93414e-18	General endothelium
apbb2b	5.60077e-22	0.0565585	0.05	0.009	9.68878e-18	General endothelium
rgs3b	5.78274e-22	0.108287	0.081	0.023	1.00036e-17	General endothelium
fgd4a	5.86614e-22	0.0533966	0.044	0.007	1.01478e-17	General endothelium
ccdc136b	6.76618e-22	0.0345543	0.024	0.002	1.17048e-17	General endothelium
efnb2a	7.17659e-22	0.523702	0.124	0.047	1.24148e-17	General endothelium
cdc42se1	7.43665e-22	0.151417	0.134	0.052	1.28647e-17	General endothelium
slc12a4	8.38041e-22	0.0544898	0.041	0.006	1.44973e-17	General endothelium
rhoj	8.4961e-22	0.0352618	0.027	0.002	1.46974e-17	General endothelium
prox1a	8.74226e-22	0.0371119	0.027	0.002	1.51232e-17	General endothelium
igf2bp2b	9.92547e-22	0.119284	0.123	0.045	1.71701e-17	General endothelium
efnb2b	1.30568e-21	0.0463886	0.035	0.004	2.25869e-17	General endothelium
sall4	1.32094e-21	0.124691	0.108	0.037	2.28509e-17	General endothelium
col1a2	1.52195e-21	0.0555967	0.117	0.041	2.63281e-17	General endothelium
gli2a	1.54414e-21	0.0928623	0.08	0.022	2.67121e-17	General endothelium
wwtr1	1.57519e-21	0.0436839	0.034	0.004	2.72493e-17	General endothelium
si:ch211-269k10.2	1.58439e-21	0.0669542	0.052	0.01	2.74084e-17	General endothelium
tcf7l2	2.05448e-21	0.0722459	0.058	0.013	3.55404e-17	General endothelium
ccm2l	2.16007e-21	0.106613	0.108	0.037	3.73671e-17	General endothelium
stom	2.36809e-21	0.139438	0.14	0.056	4.09655e-17	General endothelium
agfg1b	2.5307e-21	0.0772627	0.071	0.018	4.37785e-17	General endothelium
egfra	2.63179e-21	0.0625505	0.05	0.009	4.55273e-17	General endothelium
nrp1b	2.89796e-21	0.0632041	0.051	0.01	5.01318e-17	General endothelium
slco2b1	2.97776e-21	0.0386487	0.026	0.002	5.15122e-17	General endothelium
si:dkeyp-117h8.2	3.03264e-21	0.0370659	0.026	0.002	5.24617e-17	General endothelium
rnd1b	3.57823e-21	0.058086	0.044	0.007	6.18998e-17	General endothelium
shc1	3.61375e-21	0.143772	0.167	0.073	6.25143e-17	General endothelium
angptl4	4.2075e-21	0.124073	0.125	0.047	7.27855e-17	General endothelium
col4a3bpb	4.57934e-21	0.0594397	0.049	0.009	7.9218e-17	General endothelium
ttyh2l	4.78514e-21	0.0391318	0.027	0.002	8.27781e-17	General endothelium
snrkb	5.38907e-21	0.0313765	0.024	0.002	9.32255e-17	General endothelium
cmtm7	5.4209e-21	0.254457	0.214	0.109	9.37761e-17	General endothelium
zmp:0000001114	8.00287e-21	0.0609868	0.047	0.009	1.38442e-16	General endothelium
CABZ01112387.1	9.2248e-21	0.0724705	0.062	0.015	1.5958e-16	General endothelium
rap1b	1.31011e-20	0.47433	0.565	0.478	2.26636e-16	General endothelium
fbxl7	1.39983e-20	0.064343	0.056	0.013	2.42157e-16	General endothelium
mxi1	2.17741e-20	0.240201	0.174	0.081	3.76669e-16	General endothelium
CR790380.1	2.41388e-20	0.0583498	0.05	0.01	4.17578e-16	General endothelium
sema3ab	2.46975e-20	0.0343835	0.027	0.003	4.27242e-16	General endothelium
vdac3	2.47795e-20	0.383025	0.278	0.163	4.28661e-16	General endothelium
FQ976914.1	2.67675e-20	0.0768393	0.072	0.02	4.63051e-16	General endothelium
zgc:110182	2.74322e-20	0.0736434	0.068	0.018	4.7455e-16	General endothelium
lyve1a	3.607e-20	0.0590461	0.019	0.001	6.23975e-16	General endothelium
heg1	3.74598e-20	0.0327465	0.024	0.002	6.48017e-16	General endothelium
arhgap42a	3.95023e-20	0.0628576	0.061	0.015	6.83351e-16	General endothelium
tspan4b	3.95377e-20	0.3122	0.28	0.163	6.83962e-16	General endothelium
cyp26b1	3.9597e-20	0.2029	0.044	0.008	6.84989e-16	General endothelium
limk2	4.22932e-20	0.0471511	0.041	0.007	7.3163e-16	General endothelium
cldn11b	4.47779e-20	0.072045	0.063	0.016	7.74613e-16	General endothelium
rhbdl2	5.1255e-20	0.0772751	0.076	0.022	8.8666e-16	General endothelium
akr1a1b	5.24948e-20	0.194907	0.181	0.085	9.08108e-16	General endothelium
rnf144ab	5.69536e-20	0.0594397	0.045	0.008	9.8524e-16	General endothelium
tgm1l1	6.29325e-20	0.0487481	0.042	0.007	1.08867e-15	General endothelium
pvalb2	8.61877e-20	0.111551	0.026	0.002	1.49096e-15	General endothelium
actn4	9.31192e-20	0.15978	0.174	0.08	1.61087e-15	General endothelium
pcdh1b	1.14099e-19	0.0375963	0.03	0.004	1.97381e-15	General endothelium
anks1ab	1.14302e-19	0.0343835	0.027	0.003	1.97731e-15	General endothelium
rflnb	1.23057e-19	0.0371119	0.028	0.003	2.12876e-15	General endothelium
irx5b	1.32372e-19	0.0529309	0.035	0.005	2.28991e-15	General endothelium
tcf7l1b	1.63455e-19	0.151209	0.132	0.054	2.8276e-15	General endothelium
arpc2	1.90265e-19	0.424627	0.53	0.417	3.2914e-15	General endothelium
fnbp1l	2.03782e-19	0.0572607	0.05	0.01	3.52522e-15	General endothelium
tcf7l1a	2.28755e-19	0.121885	0.103	0.037	3.95724e-15	General endothelium
si:ch73-204p21.2	2.36361e-19	0.0338951	0.024	0.002	4.08881e-15	General endothelium
CABZ01018269.1	2.46022e-19	0.052988	0.041	0.007	4.25594e-15	General endothelium
fkbp7	3.09032e-19	0.112611	0.116	0.044	5.34594e-15	General endothelium
arpc3	3.57133e-19	0.440524	0.551	0.437	6.17804e-15	General endothelium
zgc:194398	3.99654e-19	0.0529595	0.04	0.007	6.91361e-15	General endothelium
fam174b	4.03274e-19	0.224832	0.168	0.079	6.97623e-15	General endothelium
flrt1b	4.28978e-19	0.0466787	0.037	0.006	7.42089e-15	General endothelium
scml2	5.33963e-19	0.134641	0.129	0.052	9.23702e-15	General endothelium
sipa1l1	6.01991e-19	0.0669811	0.054	0.013	1.04138e-14	General endothelium
pawr	6.87501e-19	0.0541343	0.046	0.009	1.18931e-14	General endothelium
map7d1b	7.41981e-19	0.098908	0.091	0.031	1.28355e-14	General endothelium
cux1a	7.52838e-19	0.0899947	0.095	0.032	1.30233e-14	General endothelium
grapa	9.84358e-19	0.0943931	0.073	0.022	1.70284e-14	General endothelium
ece1	1.05195e-18	0.0781432	0.076	0.023	1.81976e-14	General endothelium
gbx2	1.05511e-18	0.0714389	0.061	0.016	1.82523e-14	General endothelium
ralaa	1.09886e-18	0.0626229	0.055	0.013	1.90091e-14	General endothelium
tram2	1.12037e-18	0.113917	0.106	0.039	1.93813e-14	General endothelium
lpp	1.14607e-18	0.117149	0.102	0.037	1.98258e-14	General endothelium
epha2b	1.55285e-18	0.0411917	0.029	0.004	2.68627e-14	General endothelium
srgap1a	1.5678e-18	0.040357	0.034	0.005	2.71215e-14	General endothelium
samd4a	1.67789e-18	0.0459866	0.036	0.006	2.90258e-14	General endothelium
snx4	1.79871e-18	0.125699	0.126	0.052	3.1116e-14	General endothelium
tnfrsfa	1.86314e-18	0.0353097	0.028	0.003	3.22305e-14	General endothelium
mob3c	1.86828e-18	0.0720927	0.07	0.02	3.23194e-14	General endothelium
slc12a7b	1.97943e-18	0.104232	0.098	0.035	3.42421e-14	General endothelium
si:ch211-126j24.1	2.00012e-18	0.0485298	0.043	0.008	3.46001e-14	General endothelium
myo1ca	2.07902e-18	0.0590036	0.044	0.009	3.59649e-14	General endothelium
rbms2b	2.10804e-18	0.0804985	0.08	0.025	3.64671e-14	General endothelium
klhl3	2.23288e-18	0.0458041	0.04	0.007	3.86267e-14	General endothelium
sept12	2.25057e-18	0.256279	0.252	0.144	3.89326e-14	General endothelium
capns1a	2.44871e-18	0.227915	0.221	0.12	4.23602e-14	General endothelium
pkn1a	2.66874e-18	0.206529	0.2	0.103	4.61666e-14	General endothelium
elmo1	2.91353e-18	0.323709	0.358	0.233	5.04012e-14	General endothelium
znf654	3.19105e-18	0.0935042	0.106	0.04	5.5202e-14	General endothelium
si:ch73-375g18.1	3.3941e-18	0.0681534	0.067	0.019	5.87146e-14	General endothelium
itga6a	3.78255e-18	0.048715	0.038	0.007	6.54344e-14	General endothelium
tlnrd1	4.01798e-18	0.0781401	0.08	0.025	6.9507e-14	General endothelium
dab2ipa	4.23648e-18	0.0444176	0.034	0.005	7.32869e-14	General endothelium
rock2a	4.25839e-18	0.127307	0.139	0.06	7.36659e-14	General endothelium
ext1a	4.79438e-18	0.0516192	0.04	0.007	8.2938e-14	General endothelium
tsku	5.31973e-18	0.0552765	0.049	0.011	9.2026e-14	General endothelium
flot2a	5.36542e-18	0.178673	0.185	0.093	9.28164e-14	General endothelium
spry4	5.53918e-18	0.201404	0.131	0.056	9.58223e-14	General endothelium
zgc:92107	5.708e-18	0.228649	0.185	0.094	9.87426e-14	General endothelium
gmfb	5.84337e-18	0.423286	0.398	0.284	1.01084e-13	General endothelium
ablim3	7.3412e-18	0.0543253	0.042	0.008	1.26995e-13	General endothelium
gnsa	7.72615e-18	0.0617744	0.058	0.015	1.33655e-13	General endothelium
pxdn	8.01066e-18	0.0343835	0.026	0.003	1.38576e-13	General endothelium
picalmb	8.12298e-18	0.0555199	0.052	0.012	1.40519e-13	General endothelium
si:ch1073-186i23.1	8.81312e-18	0.0480933	0.043	0.009	1.52458e-13	General endothelium
si:ch211-212k18.9	9.02539e-18	0.0398764	0.032	0.005	1.5613e-13	General endothelium
si:ch211-147k10.5	1.02217e-17	0.0584401	0.055	0.014	1.76825e-13	General endothelium
zgc:110158	1.0839e-17	0.071387	0.058	0.015	1.87504e-13	General endothelium
adgra2	1.11481e-17	0.0417122	0.034	0.005	1.92851e-13	General endothelium
kalrnb	1.29265e-17	0.215528	0.09	0.032	2.23616e-13	General endothelium
ephx5	1.30514e-17	0.0369386	0.03	0.004	2.25776e-13	General endothelium
pkp4	1.43284e-17	0.0577429	0.052	0.012	2.47866e-13	General endothelium
thsd1.1	1.74427e-17	0.040357	0.033	0.005	3.01742e-13	General endothelium
plxnd1	1.77067e-17	0.0387812	0.033	0.005	3.06309e-13	General endothelium
jam2a	1.79903e-17	0.155036	0.125	0.052	3.11213e-13	General endothelium
dzip1	1.88951e-17	0.0787783	0.064	0.018	3.26866e-13	General endothelium
atxn7l2a	1.96117e-17	0.0815716	0.077	0.024	3.39262e-13	General endothelium
timp2a	1.96672e-17	0.0521446	0.045	0.01	3.40223e-13	General endothelium
slc22a31	2.10071e-17	0.0934054	0.089	0.031	3.63402e-13	General endothelium
tnrc18	2.50525e-17	0.112534	0.097	0.036	4.33383e-13	General endothelium
si:ch211-178n15.1	2.54476e-17	0.0307174	0.023	0.002	4.40218e-13	General endothelium
si:ch211-107n13.1	3.0859e-17	0.0341641	0.026	0.003	5.33831e-13	General endothelium
pea15	3.13055e-17	0.0300586	0.024	0.002	5.41553e-13	General endothelium
znf532	3.15882e-17	0.032139	0.026	0.003	5.46443e-13	General endothelium
selenon	3.34814e-17	0.113497	0.102	0.038	5.79194e-13	General endothelium
ccdc120	3.87898e-17	0.0537261	0.044	0.009	6.71025e-13	General endothelium
myh10	3.93573e-17	0.209927	0.246	0.141	6.80842e-13	General endothelium
cnn3b	5.93048e-17	0.0826384	0.074	0.024	1.02591e-12	General endothelium
cnp	6.36093e-17	0.182802	0.216	0.117	1.10038e-12	General endothelium
gna12a	6.92891e-17	0.0744611	0.068	0.02	1.19863e-12	General endothelium
mtfr1	7.09378e-17	0.0421905	0.034	0.006	1.22715e-12	General endothelium
yap1	7.58766e-17	0.158587	0.12	0.05	1.31259e-12	General endothelium
pcdh19	8.15003e-17	0.131085	0.059	0.016	1.40987e-12	General endothelium
prss23	8.75662e-17	0.0582004	0.051	0.012	1.51481e-12	General endothelium
dvl2	8.92656e-17	0.0912556	0.091	0.033	1.54421e-12	General endothelium
gnai2a	1.01895e-16	0.388738	0.333	0.225	1.76268e-12	General endothelium
uacaa	1.02381e-16	0.0428073	0.03	0.005	1.7711e-12	General endothelium
ppp1r26	1.41078e-16	0.0881486	0.087	0.031	2.44051e-12	General endothelium
BX569787.1	1.58244e-16	0.0367195	0.029	0.004	2.73746e-12	General endothelium
wipf2a	2.06626e-16	0.0749218	0.077	0.025	3.57442e-12	General endothelium
traf4a	2.26373e-16	0.0584401	0.052	0.013	3.91602e-12	General endothelium
rin2	2.2681e-16	0.0651339	0.065	0.02	3.92358e-12	General endothelium
arhgap36	2.47331e-16	0.0541071	0.041	0.008	4.27857e-12	General endothelium
gng10	2.49692e-16	0.100145	0.085	0.03	4.31942e-12	General endothelium
snx7	3.18699e-16	0.17441	0.186	0.097	5.51317e-12	General endothelium
bmp1a	3.34562e-16	0.0619909	0.058	0.016	5.78758e-12	General endothelium
tshz1	3.81351e-16	0.0871445	0.07	0.022	6.59699e-12	General endothelium
jupa	3.95384e-16	0.361958	0.274	0.174	6.83974e-12	General endothelium
skib	4.21571e-16	0.0392627	0.034	0.006	7.29276e-12	General endothelium
ext2	4.25181e-16	0.0948582	0.113	0.047	7.35521e-12	General endothelium
sh3pxd2aa	4.62782e-16	0.0855853	0.089	0.033	8.00566e-12	General endothelium
slc25a1a	5.04148e-16	0.0487812	0.042	0.009	8.72125e-12	General endothelium
pon3.2.1	5.28574e-16	0.0611053	0.055	0.015	9.1438e-12	General endothelium
adam12	5.50123e-16	0.0633256	0.058	0.016	9.51657e-12	General endothelium
foxa	6.29312e-16	0.0403147	0.028	0.004	1.08865e-11	General endothelium
pbxip1a	9.16809e-16	0.0483116	0.04	0.008	1.58599e-11	General endothelium
h2afy2	9.52904e-16	0.26938	0.323	0.217	1.64843e-11	General endothelium
rai14	1.14764e-15	0.0595893	0.056	0.016	1.9853e-11	General endothelium
gli3	1.27349e-15	0.0542427	0.051	0.013	2.20301e-11	General endothelium
CU929259.1	1.33538e-15	0.102392	0.073	0.025	2.31007e-11	General endothelium
CABZ01026153.1	1.55508e-15	0.0339446	0.025	0.003	2.69014e-11	General endothelium
ptp4a3	1.63478e-15	0.114442	0.116	0.05	2.82801e-11	General endothelium
dgkh	1.78995e-15	0.0355768	0.028	0.004	3.09643e-11	General endothelium
stxbp1a	1.816e-15	0.0432225	0.037	0.007	3.1415e-11	General endothelium
fuca1.2	1.99468e-15	0.0958607	0.094	0.036	3.4506e-11	General endothelium
CABZ01067979.1	2.12545e-15	0.0312093	0.023	0.003	3.67681e-11	General endothelium
cmtm6	2.23793e-15	0.103911	0.113	0.048	3.8714e-11	General endothelium
rhoub	2.7992e-15	0.0644557	0.056	0.016	4.84234e-11	General endothelium
vangl2	2.97483e-15	0.122723	0.149	0.072	5.14616e-11	General endothelium
trioa	3.11631e-15	0.0679621	0.065	0.021	5.39091e-11	General endothelium
igf1rb	3.2245e-15	0.0498134	0.049	0.012	5.57806e-11	General endothelium
tspan9b	3.3065e-15	0.0442748	0.037	0.008	5.71991e-11	General endothelium
cblb	3.40341e-15	0.0745042	0.078	0.027	5.88756e-11	General endothelium
pros1	3.46304e-15	0.0821836	0.087	0.032	5.99071e-11	General endothelium
dsRed	3.67564e-15	0.507795	0.148	0.075	6.35849e-11	General endothelium
il11ra	3.78731e-15	0.0317003	0.026	0.004	6.55167e-11	General endothelium
rassf8a	3.78731e-15	0.0317003	0.026	0.004	6.55167e-11	General endothelium
coro1ca	3.91809e-15	0.365649	0.37	0.27	6.77791e-11	General endothelium
ubc	4.58307e-15	0.420376	0.891	0.876	7.92826e-11	General endothelium
hrasa	4.85039e-15	0.0517684	0.049	0.013	8.3907e-11	General endothelium
cavin1b	4.93518e-15	0.0443797	0.025	0.003	8.53737e-11	General endothelium
si:ch211-133n4.4	5.0868e-15	0.0768741	0.08	0.029	8.79965e-11	General endothelium
aldh9a1a.1	5.16363e-15	0.234279	0.214	0.123	8.93256e-11	General endothelium
tmeff1b	6.56144e-15	0.0871334	0.1	0.041	1.13506e-10	General endothelium
amer1	7.09594e-15	0.0620468	0.061	0.019	1.22753e-10	General endothelium
si:dkey-204f11.64	7.16271e-15	0.129518	0.106	0.045	1.23908e-10	General endothelium
cdc42bpab	7.63048e-15	0.0321903	0.027	0.004	1.32e-10	General endothelium
znf703	8.13713e-15	0.202671	0.159	0.082	1.40764e-10	General endothelium
slc38a10	8.97209e-15	0.161036	0.198	0.109	1.55208e-10	General endothelium
gnb1b	9.88596e-15	0.489242	0.614	0.592	1.71017e-10	General endothelium
furinb	1.1313e-14	0.0356243	0.03	0.005	1.95704e-10	General endothelium
castor1	1.25593e-14	0.076649	0.081	0.03	2.17263e-10	General endothelium
ca16b	1.27232e-14	0.057549	0.049	0.013	2.20098e-10	General endothelium
rybpa	1.29121e-14	0.0712236	0.067	0.022	2.23366e-10	General endothelium
col11a1b	1.44446e-14	0.0492915	0.052	0.014	2.49876e-10	General endothelium
gpx8	1.47507e-14	0.0712849	0.076	0.027	2.55172e-10	General endothelium
raph1b	1.55539e-14	0.0620653	0.061	0.019	2.69068e-10	General endothelium
lrrc1	1.56301e-14	0.0519858	0.047	0.012	2.70385e-10	General endothelium
plekha1a	1.60466e-14	0.0787872	0.078	0.028	2.7759e-10	General endothelium
ms4a17a.11	1.79852e-14	0.041753	0.033	0.006	3.11125e-10	General endothelium
slc9a7	1.8215e-14	0.0745201	0.082	0.031	3.15101e-10	General endothelium
rnf13	1.89557e-14	0.0844676	0.103	0.043	3.27914e-10	General endothelium
LO018383.1	1.97553e-14	0.0355768	0.027	0.004	3.41747e-10	General endothelium
ERC1	2.0125e-14	0.0447864	0.042	0.01	3.48142e-10	General endothelium
lhfpl6	2.2436e-14	0.0969886	0.112	0.049	3.8812e-10	General endothelium
zgc:153372	2.60692e-14	0.0367658	0.03	0.005	4.50971e-10	General endothelium
ppp1r9ala	2.64527e-14	0.0351865	0.03	0.005	4.57605e-10	General endothelium
adam17a	2.80874e-14	0.153214	0.176	0.094	4.85885e-10	General endothelium
lamp1b	2.82124e-14	0.0534027	0.052	0.015	4.88046e-10	General endothelium
adam8a	2.97183e-14	0.117738	0.252	0.146	5.14097e-10	General endothelium
laptm4b	3.07255e-14	0.0929735	0.112	0.049	5.31521e-10	General endothelium
atrx	3.45305e-14	0.285174	0.368	0.271	5.97343e-10	General endothelium
adam19b	3.87114e-14	0.0598199	0.069	0.023	6.69668e-10	General endothelium
ets1	4.05349e-14	0.0365933	0.033	0.006	7.01214e-10	General endothelium
ponzr1	4.17367e-14	0.0872176	0.084	0.032	7.22002e-10	General endothelium
hoxc6b	4.19331e-14	0.0496283	0.045	0.012	7.25401e-10	General endothelium
pou2f2a.1	4.20085e-14	0.0483785	0.04	0.009	7.26705e-10	General endothelium
ilk	4.35101e-14	0.214523	0.2	0.114	7.52681e-10	General endothelium
foxp1b	4.41821e-14	0.0558387	0.052	0.015	7.64307e-10	General endothelium
itgb5	4.42519e-14	0.0415753	0.034	0.007	7.65514e-10	General endothelium
parvab	4.49424e-14	0.0375963	0.025	0.004	7.77459e-10	General endothelium
amotl2b	4.58676e-14	0.0444932	0.035	0.007	7.93464e-10	General endothelium
agpat4	4.71989e-14	0.0960827	0.105	0.045	8.16494e-10	General endothelium
CU459056.1	5.49318e-14	0.159883	0.15	0.077	9.50266e-10	General endothelium
ankrd13b	6.49379e-14	0.0303316	0.024	0.003	1.12336e-09	General endothelium
efs	6.6756e-14	0.0522906	0.052	0.015	1.15481e-09	General endothelium
rab34a	7.13757e-14	0.0361093	0.032	0.006	1.23473e-09	General endothelium
cyth3a	7.26043e-14	0.0370306	0.032	0.006	1.25598e-09	General endothelium
me3	7.52815e-14	0.0640897	0.069	0.024	1.30229e-09	General endothelium
aida	7.81577e-14	0.0634453	0.068	0.023	1.35205e-09	General endothelium
gnb4b	8.13919e-14	0.0696865	0.062	0.02	1.408e-09	General endothelium
ptpra	8.15173e-14	0.0370306	0.033	0.007	1.41017e-09	General endothelium
shisa2a	9.50743e-14	0.0409617	0.036	0.008	1.64469e-09	General endothelium
rab5c	9.50829e-14	0.463424	0.564	0.509	1.64484e-09	General endothelium
taok1b	1.0243e-13	0.0649339	0.064	0.022	1.77194e-09	General endothelium
itpkb	1.13606e-13	0.0889349	0.09	0.037	1.96528e-09	General endothelium
prkar1aa	1.17382e-13	0.109477	0.146	0.073	2.0306e-09	General endothelium
zc4h2	1.19344e-13	0.143667	0.148	0.075	2.06454e-09	General endothelium
chst14	1.20888e-13	0.0445684	0.041	0.01	2.09124e-09	General endothelium
rgs3a	1.36057e-13	0.0499989	0.046	0.013	2.35365e-09	General endothelium
rras	1.40328e-13	0.0893092	0.095	0.039	2.42753e-09	General endothelium
si:dkey-253i9.4	1.44021e-13	0.107123	0.113	0.051	2.49142e-09	General endothelium
si:dkey-23i12.7	1.51989e-13	0.0471417	0.04	0.009	2.62926e-09	General endothelium
capgb	1.5938e-13	0.207126	0.218	0.126	2.75712e-09	General endothelium
baz2ba	1.64516e-13	0.194052	0.2	0.116	2.84596e-09	General endothelium
hmga2	1.68062e-13	0.0437737	0.043	0.011	2.9073e-09	General endothelium
lpar1	1.7071e-13	0.052838	0.055	0.017	2.95311e-09	General endothelium
ajuba	1.71021e-13	0.0706064	0.07	0.025	2.9585e-09	General endothelium
slc44a2	1.74172e-13	0.0779399	0.082	0.032	3.013e-09	General endothelium
hoxc8a	1.75412e-13	0.0527698	0.034	0.007	3.03446e-09	General endothelium
flot1b	1.77341e-13	0.289223	0.331	0.234	3.06782e-09	General endothelium
prkcea	1.99765e-13	0.0558387	0.051	0.015	3.45574e-09	General endothelium
p3h3	2.00761e-13	0.0525074	0.051	0.015	3.47296e-09	General endothelium
h1f0	2.0776e-13	0.420693	0.283	0.182	3.59404e-09	General endothelium
ckap4	2.31888e-13	0.0783783	0.091	0.037	4.01142e-09	General endothelium
tsc22d3	2.45629e-13	0.112967	0.09	0.037	4.24914e-09	General endothelium
rftn2	2.5824e-13	0.0456585	0.038	0.009	4.4673e-09	General endothelium
aldoaa	2.71476e-13	0.197688	0.494	0.71	4.69627e-09	General endothelium
r3hcc1	2.75078e-13	0.123364	0.087	0.035	4.75858e-09	General endothelium
unc119.1	3.05269e-13	0.0671531	0.071	0.026	5.28085e-09	General endothelium
stk35l	3.31863e-13	0.123376	0.144	0.074	5.74089e-09	General endothelium
si:dkey-151m22.8	3.32434e-13	0.0362813	0.025	0.004	5.75078e-09	General endothelium
rrbp1a	3.51916e-13	0.13792	0.182	0.101	6.08779e-09	General endothelium
ston2	3.62861e-13	0.0480778	0.049	0.014	6.27713e-09	General endothelium
ahi1	4.05403e-13	0.0889828	0.076	0.029	7.01306e-09	General endothelium
dvl3a	4.48503e-13	0.0897867	0.117	0.055	7.75865e-09	General endothelium
sgce	4.53294e-13	0.0454404	0.038	0.009	7.84154e-09	General endothelium
si:dkey-193c22.2	4.71475e-13	0.0506202	0.042	0.011	8.15604e-09	General endothelium
uri1	4.78563e-13	0.275432	0.3	0.205	8.27867e-09	General endothelium
lrp5	5.05912e-13	0.072838	0.086	0.035	8.75176e-09	General endothelium
lpar6a	5.1316e-13	0.05408	0.052	0.016	8.87715e-09	General endothelium
si:dkey-7j14.6	5.27086e-13	0.106894	0.125	0.06	9.11806e-09	General endothelium
ldb1a	5.43466e-13	0.102427	0.122	0.058	9.40141e-09	General endothelium
nf2b	5.48091e-13	0.0612416	0.064	0.022	9.48142e-09	General endothelium
esyt2a	6.05991e-13	0.0520739	0.05	0.015	1.0483e-08	General endothelium
sh3rf1	6.3816e-13	0.0390876	0.033	0.007	1.10395e-08	General endothelium
scn4bb	6.85288e-13	0.0355481	0.034	0.007	1.18548e-08	General endothelium
asxl1	7.61648e-13	0.0994937	0.13	0.064	1.31757e-08	General endothelium
grinab	7.79178e-13	0.145767	0.151	0.079	1.3479e-08	General endothelium
fhod1	7.88365e-13	0.0503713	0.038	0.009	1.36379e-08	General endothelium
inppl1a	8.08193e-13	0.100299	0.143	0.073	1.39809e-08	General endothelium
pon3.2	8.37968e-13	0.0504337	0.044	0.012	1.4496e-08	General endothelium
st5	8.93116e-13	0.101041	0.073	0.028	1.545e-08	General endothelium
wwc3	9.67505e-13	0.067205	0.076	0.029	1.67369e-08	General endothelium
si:ch211-183d21.1	9.76458e-13	0.0389566	0.037	0.009	1.68917e-08	General endothelium
ptbp1a	1.018e-12	0.362498	0.4	0.314	1.76103e-08	General endothelium
CABZ01061495.1	1.0359e-12	0.0363281	0.029	0.006	1.79201e-08	General endothelium
pld1a	1.04653e-12	0.0398289	0.036	0.009	1.81039e-08	General endothelium
epn3a	1.05286e-12	0.0426084	0.041	0.011	1.82134e-08	General endothelium
esd	1.11799e-12	0.157708	0.163	0.089	1.93402e-08	General endothelium
grb2a	1.23854e-12	0.0301658	0.026	0.005	2.14255e-08	General endothelium
sort1a	1.25032e-12	0.0517294	0.053	0.017	2.16293e-08	General endothelium
nedd4a	1.28653e-12	0.0549987	0.054	0.017	2.22558e-08	General endothelium
trove2	2.24643e-12	0.0423908	0.042	0.011	3.8861e-08	General endothelium
pkdcca	2.35266e-12	0.0357191	0.033	0.007	4.06987e-08	General endothelium
DNAH10	2.36171e-12	0.0366396	0.033	0.007	4.08552e-08	General endothelium
tmem51a	2.40795e-12	0.0400896	0.038	0.01	4.16551e-08	General endothelium
selenbp1	2.72191e-12	0.0559141	0.054	0.018	4.70863e-08	General endothelium
cdkn1cb	2.72897e-12	0.0526669	0.043	0.012	4.72085e-08	General endothelium
abi1b	2.74201e-12	0.042826	0.041	0.011	4.7434e-08	General endothelium
myo18ab	2.77498e-12	0.186946	0.194	0.114	4.80045e-08	General endothelium
chka	2.91669e-12	0.0304381	0.026	0.005	5.04559e-08	General endothelium
hs3st3b1b	3.51416e-12	0.0322416	0.027	0.005	6.07914e-08	General endothelium
sema3fa	4.24673e-12	0.0318554	0.028	0.006	7.34642e-08	General endothelium
thbs1b	4.43266e-12	0.0470634	0.038	0.01	7.66806e-08	General endothelium
ralbb	4.79118e-12	0.0964335	0.112	0.053	8.28827e-08	General endothelium
zfp36l1a	5.44415e-12	0.0545928	0.053	0.017	9.41783e-08	General endothelium
gas1a	5.44688e-12	0.0893092	0.088	0.038	9.42256e-08	General endothelium
ugt1b5	6.13005e-12	0.145772	0.185	0.107	1.06044e-07	General endothelium
agrn	6.67587e-12	0.122132	0.093	0.041	1.15486e-07	General endothelium
reep3a	6.86769e-12	0.0452959	0.041	0.011	1.18804e-07	General endothelium
pik3r6a	7.51432e-12	0.0619056	0.06	0.021	1.2999e-07	General endothelium
sema6d	7.64284e-12	0.0537019	0.054	0.018	1.32213e-07	General endothelium
rhoaa	7.79132e-12	0.461456	0.533	0.496	1.34782e-07	General endothelium
si:dkey-42i9.4	8.0869e-12	0.258552	0.21	0.131	1.39895e-07	General endothelium
snx11	9.60681e-12	0.0960539	0.124	0.062	1.66188e-07	General endothelium
cd99	1.01408e-11	0.0735062	0.079	0.032	1.75426e-07	General endothelium
tp53i11b	1.08686e-11	0.0396108	0.035	0.009	1.88016e-07	General endothelium
homer3b	1.12961e-11	0.0486106	0.053	0.018	1.95412e-07	General endothelium
serpinb1	1.18123e-11	0.0391737	0.041	0.011	2.04341e-07	General endothelium
ppp2r5d	1.22693e-11	0.212497	0.249	0.166	2.12246e-07	General endothelium
cyr61	1.30671e-11	0.137473	0.108	0.052	2.26048e-07	General endothelium
ralgapa1	1.37528e-11	0.126434	0.134	0.07	2.3791e-07	General endothelium
jun	1.39726e-11	0.410263	0.279	0.194	2.41712e-07	General endothelium
tdh2	1.43235e-11	0.0385623	0.027	0.005	2.47782e-07	General endothelium
si:dkey-240h12.4	1.44041e-11	0.034627	0.033	0.008	2.49177e-07	General endothelium
zgc:154055	1.44608e-11	0.0670875	0.055	0.019	2.50157e-07	General endothelium
stau1	1.47243e-11	0.11772	0.152	0.083	2.54716e-07	General endothelium
rac3b	1.53309e-11	0.0355006	0.032	0.007	2.65209e-07	General endothelium
ralgapb	1.66088e-11	0.0325114	0.029	0.006	2.87315e-07	General endothelium
stox1	1.68594e-11	0.0429046	0.043	0.013	2.91651e-07	General endothelium
purab	1.70959e-11	0.0762431	0.081	0.034	2.95742e-07	General endothelium
mprip	1.72612e-11	0.101165	0.12	0.06	2.98601e-07	General endothelium
caskb	1.77265e-11	0.0603205	0.058	0.02	3.06651e-07	General endothelium
hmgb2a	1.83544e-11	0.0437899	0.984	0.969	3.17512e-07	General endothelium
si:dkey-9i23.15	1.84633e-11	0.0604959	0.052	0.017	3.19396e-07	General endothelium
calr	2.0831e-11	0.291181	0.29	0.198	3.60356e-07	General endothelium
ccni	2.08337e-11	0.265112	0.277	0.191	3.60403e-07	General endothelium
inpp4aa	2.12428e-11	0.0644321	0.076	0.031	3.67479e-07	General endothelium
NAV1 (1 of many)	2.20386e-11	0.0355481	0.034	0.008	3.81245e-07	General endothelium
klf12a	2.31875e-11	0.0671661	0.068	0.026	4.01121e-07	General endothelium
fmr1	2.38158e-11	0.111054	0.152	0.084	4.1199e-07	General endothelium
eif4ebp2	2.41173e-11	0.343986	0.334	0.251	4.17205e-07	General endothelium
mpped2a	2.42421e-11	0.185926	0.078	0.033	4.19365e-07	General endothelium
pdlim5b	2.55738e-11	0.0391746	0.036	0.009	4.42401e-07	General endothelium
slc29a1b	2.90931e-11	0.279722	0.107	0.215	5.03282e-07	General endothelium
mycn	2.93406e-11	0.184168	0.144	0.079	5.07563e-07	General endothelium
insig1	3.36797e-11	0.123773	0.115	0.058	5.82625e-07	General endothelium
ksr1b	3.53951e-11	0.0838202	0.098	0.046	6.123e-07	General endothelium
camk2g1	3.58951e-11	0.137493	0.132	0.07	6.2095e-07	General endothelium
sult2st2	3.64316e-11	0.0404337	0.04	0.011	6.3023e-07	General endothelium
fam49a	4.13082e-11	0.0806803	0.106	0.051	7.14591e-07	General endothelium
ndst2a	4.18713e-11	0.0483944	0.051	0.017	7.24331e-07	General endothelium
fosl2	4.35939e-11	0.151547	0.178	0.103	7.54131e-07	General endothelium
ggcx	4.63772e-11	0.0966623	0.116	0.058	8.02279e-07	General endothelium
nfkbib	5.08302e-11	0.0605563	0.056	0.02	8.79312e-07	General endothelium
tpst1	5.26433e-11	0.0846522	0.097	0.045	9.10676e-07	General endothelium
arpc5la	5.3004e-11	0.0821654	0.095	0.044	9.16916e-07	General endothelium
parvaa	5.33246e-11	0.0490105	0.049	0.016	9.22462e-07	General endothelium
cebpd	5.67343e-11	0.0626044	0.049	0.016	9.81447e-07	General endothelium
wnt9a	6.62156e-11	0.0532908	0.036	0.01	1.14546e-06	General endothelium
map3k3	7.20019e-11	0.0437737	0.042	0.013	1.24556e-06	General endothelium
carhsp1	7.37115e-11	0.195288	0.243	0.16	1.27514e-06	General endothelium
metrnla	7.43561e-11	0.130655	0.104	0.05	1.28629e-06	General endothelium
kif3a	7.77652e-11	0.0622484	0.072	0.03	1.34526e-06	General endothelium
vps26a	8.04524e-11	0.084376	0.116	0.059	1.39175e-06	General endothelium
ifi30	8.61904e-11	0.243007	0.229	0.147	1.49101e-06	General endothelium
lmo7a	8.93317e-11	0.0491849	0.03	0.007	1.54535e-06	General endothelium
tcima	1.03964e-10	0.177238	0.094	0.044	1.79848e-06	General endothelium
rgcc	1.04619e-10	0.0491181	0.058	0.021	1.80981e-06	General endothelium
CU469362.1	1.42736e-10	0.0359846	0.032	0.008	2.4692e-06	General endothelium
gna11b	1.58308e-10	0.0738931	0.078	0.034	2.73858e-06	General endothelium
lrba	1.66341e-10	0.0646502	0.09	0.042	2.87753e-06	General endothelium
dynll1	1.86996e-10	0.719942	0.756	0.723	3.23485e-06	General endothelium
pmp22b	1.87365e-10	0.181957	0.166	0.098	3.24123e-06	General endothelium
tes	1.87749e-10	0.0834172	0.09	0.042	3.24787e-06	General endothelium
ctnnb1	2.03624e-10	0.373727	0.46	0.398	3.5225e-06	General endothelium
glceb	2.12904e-10	0.0429829	0.046	0.015	3.68303e-06	General endothelium
bin1b	2.24654e-10	0.0588774	0.06	0.023	3.88628e-06	General endothelium
gata3	2.36888e-10	0.0418748	0.032	0.008	4.09793e-06	General endothelium
kmt2cb	2.43382e-10	0.199524	0.266	0.185	4.21027e-06	General endothelium
pald1b	2.47676e-10	0.0379233	0.045	0.015	4.28455e-06	General endothelium
prr12a	2.56211e-10	0.103479	0.126	0.067	4.43219e-06	General endothelium
rab2a	2.88693e-10	0.306591	0.456	0.394	4.9941e-06	General endothelium
CABZ01061591.1	2.89755e-10	0.0570894	0.056	0.021	5.01248e-06	General endothelium
EPB41L2	3.07281e-10	0.138479	0.126	0.068	5.31566e-06	General endothelium
ppm1f	3.24906e-10	0.0385646	0.037	0.011	5.62055e-06	General endothelium
spsb4a	3.45906e-10	0.0480959	0.055	0.02	5.98383e-06	General endothelium
ppdpfb	3.68571e-10	0.397771	0.366	0.28	6.3759e-06	General endothelium
snx8a	3.87087e-10	0.109389	0.096	0.046	6.69621e-06	General endothelium
tjap1	3.97429e-10	0.0359846	0.032	0.008	6.87512e-06	General endothelium
notch3	3.98729e-10	0.204715	0.112	0.057	6.89762e-06	General endothelium
ptprea	4.02204e-10	0.047564	0.051	0.018	6.95772e-06	General endothelium
ZNF462	4.1651e-10	0.0302193	0.026	0.006	7.2052e-06	General endothelium
zfyve9a	4.54357e-10	0.0548807	0.071	0.03	7.85991e-06	General endothelium
tgif1	4.79037e-10	0.162192	0.157	0.092	8.28685e-06	General endothelium
hrasb	4.92379e-10	0.0500652	0.058	0.022	8.51767e-06	General endothelium
ctdspla	5.20236e-10	0.0656384	0.063	0.025	8.99957e-06	General endothelium
sptssa	5.23581e-10	0.212046	0.272	0.193	9.05742e-06	General endothelium
trim8a	5.44583e-10	0.0781602	0.082	0.038	9.42075e-06	General endothelium
si:dkey-51a16.9	5.47192e-10	0.0536469	0.046	0.016	9.46588e-06	General endothelium
lrp10	7.38538e-10	0.0889577	0.134	0.074	1.2776e-05	General endothelium
slka	7.56192e-10	0.145639	0.184	0.113	1.30814e-05	General endothelium
ryk	7.80622e-10	0.0356898	0.037	0.011	1.3504e-05	General endothelium
pou2f1b	8.64733e-10	0.0562111	0.071	0.031	1.4959e-05	General endothelium
bsg	8.97445e-10	0.498692	0.502	0.449	1.55249e-05	General endothelium
CT956002.2	9.95959e-10	0.163084	0.053	0.02	1.72291e-05	General endothelium
gli1	1.13461e-09	0.0319069	0.028	0.007	1.96275e-05	General endothelium
mark3a	1.22811e-09	0.0835283	0.125	0.068	2.12451e-05	General endothelium
spns2	1.2732e-09	0.157164	0.186	0.116	2.20251e-05	General endothelium
cdc42	1.28758e-09	0.458449	0.414	0.352	2.22739e-05	General endothelium
nanos1	1.29546e-09	0.0453712	0.037	0.011	2.24102e-05	General endothelium
yes1	1.30396e-09	0.0502821	0.067	0.028	2.25572e-05	General endothelium
zgc:162939	1.37602e-09	0.0558387	0.045	0.016	2.38039e-05	General endothelium
plp2	1.41598e-09	0.0551198	0.069	0.029	2.44951e-05	General endothelium
clasp1a	1.46792e-09	0.0843713	0.116	0.062	2.53936e-05	General endothelium
jag1b	1.58662e-09	0.0666429	0.051	0.019	2.7447e-05	General endothelium
tp53bp2a	1.68567e-09	0.0372588	0.037	0.011	2.91603e-05	General endothelium
timp2b	1.83211e-09	0.11686	0.151	0.088	3.16936e-05	General endothelium
plod3	2.28674e-09	0.106709	0.147	0.085	3.95583e-05	General endothelium
gng2	2.28804e-09	0.219509	0.228	0.156	3.95808e-05	General endothelium
golga4	2.29381e-09	0.0593897	0.079	0.036	3.96806e-05	General endothelium
rybpb	2.38543e-09	0.0589664	0.08	0.037	4.12656e-05	General endothelium
gpt2l	2.4621e-09	0.047746	0.049	0.018	4.25919e-05	General endothelium
ralab	2.57023e-09	0.13648	0.174	0.108	4.44624e-05	General endothelium
nsd3	2.69738e-09	0.0432771	0.047	0.017	4.6662e-05	General endothelium
tcf3a	2.83115e-09	0.0423725	0.046	0.016	4.89761e-05	General endothelium
ywhag2	2.95773e-09	0.0476782	0.041	0.013	5.11658e-05	General endothelium
hapln1b	2.96313e-09	0.071245	0.269	0.184	5.12592e-05	General endothelium
sept15	3.12481e-09	0.235334	0.227	0.156	5.40561e-05	General endothelium
MYO1D	3.3235e-09	0.0351595	0.033	0.009	5.74932e-05	General endothelium
si:dkey-10p5.10	3.45189e-09	0.0321764	0.03	0.008	5.97142e-05	General endothelium
mbd3b	3.6122e-09	0.067507	0.072	0.032	6.24874e-05	General endothelium
ntn1a	3.74426e-09	0.0324305	0.03	0.008	6.4772e-05	General endothelium
rab5aa	3.77564e-09	0.254729	0.257	0.185	6.53148e-05	General endothelium
rgs12b	4.00817e-09	0.0412499	0.045	0.016	6.93374e-05	General endothelium
gnpda1	4.0698e-09	0.085454	0.156	0.091	7.04035e-05	General endothelium
nck1b	4.28905e-09	0.247313	0.255	0.184	7.41963e-05	General endothelium
eif1b	4.6549e-09	0.529007	0.6	0.6	8.05251e-05	General endothelium
hspb1	5.22566e-09	0.238093	0.088	0.044	9.03987e-05	General endothelium
mafk	5.41235e-09	0.0323946	0.03	0.009	9.36282e-05	General endothelium
qki2	5.57669e-09	0.0458754	0.042	0.014	9.64712e-05	General endothelium
sall2	5.98642e-09	0.0355668	0.04	0.013	0.000103559	General endothelium
nectin3b	6.16311e-09	0.0362029	0.027	0.007	0.000106616	General endothelium
lrch4	7.34945e-09	0.0421161	0.044	0.016	0.000127138	General endothelium
sh3gl3a	7.98025e-09	0.062444	0.064	0.028	0.00013805	General endothelium
mcl1b	8.1051e-09	0.127089	0.148	0.088	0.00014021	General endothelium
adoa	8.19168e-09	0.0350637	0.028	0.008	0.000141708	General endothelium
pik3cb	8.3951e-09	0.0621853	0.091	0.046	0.000145227	General endothelium
phactr2	8.50355e-09	0.0480959	0.054	0.022	0.000147103	General endothelium
fndc3ba	8.51368e-09	0.031522	0.03	0.009	0.000147278	General endothelium
CR382370.2	9.27535e-09	0.0502204	0.062	0.027	0.000160454	General endothelium
zdhhc8b	1.00756e-08	0.0367319	0.032	0.009	0.000174298	General endothelium
entpd1	1.06297e-08	0.0711557	0.122	0.067	0.000183884	General endothelium
swap70b	1.46209e-08	0.11384	0.17	0.105	0.000252927	General endothelium
ap1s2	1.67567e-08	0.20096	0.217	0.15	0.000289873	General endothelium
ywhah	1.87098e-08	0.0897215	0.157	0.095	0.00032366	General endothelium
zgc:153018	1.92424e-08	0.0737716	0.095	0.049	0.000332875	General endothelium
pik3r5	2.20505e-08	0.0713053	0.091	0.047	0.000381452	General endothelium
ttn.2	2.30484e-08	0.0817684	0.043	0.016	0.000398714	General endothelium
cttn	2.41519e-08	0.055409	0.07	0.032	0.000417804	General endothelium
anks1b	2.56387e-08	0.0667259	0.078	0.038	0.000443523	General endothelium
tmem176l.3a	2.66811e-08	0.0745295	0.115	0.064	0.000461557	General endothelium
ep300b	2.69585e-08	0.0916842	0.12	0.068	0.000466356	General endothelium
cemip2	2.92677e-08	0.0643554	0.095	0.049	0.000506301	General endothelium
ctnnbip1	2.92931e-08	0.0608356	0.087	0.044	0.000506741	General endothelium
irf2bpl	2.94618e-08	0.0615082	0.072	0.034	0.00050966	General endothelium
mnta	3.01698e-08	0.0677406	0.102	0.054	0.000521907	General endothelium
si:dkey-6n21.12	3.03387e-08	0.126696	0.143	0.087	0.000524829	General endothelium
pbx1a	3.08022e-08	0.0884124	0.085	0.043	0.000532848	General endothelium
ptk7a	3.11831e-08	0.0460871	0.06	0.026	0.000539436	General endothelium
eya1	3.13894e-08	0.0304534	0.046	0.018	0.000543005	General endothelium
ier2b	3.39604e-08	0.262689	0.287	0.214	0.000587481	General endothelium
sap130b	3.49869e-08	0.0679248	0.1	0.054	0.000605238	General endothelium
fign	3.73599e-08	0.0446872	0.049	0.019	0.000646289	General endothelium
utrn	3.95886e-08	0.080481	0.087	0.044	0.000684843	General endothelium
rasa1b	4.09154e-08	0.0348199	0.035	0.012	0.000707796	General endothelium
ptprsa.1	4.11272e-08	0.0353023	0.037	0.013	0.00071146	General endothelium
thrb	4.14174e-08	0.0353023	0.037	0.013	0.00071648	General endothelium
gnb1a	4.15783e-08	0.368334	0.541	0.528	0.000719264	General endothelium
bnc2	4.21947e-08	0.0519529	0.062	0.028	0.000729926	General endothelium
fzd6	4.33825e-08	0.0489569	0.052	0.021	0.000750475	General endothelium
hs6st2	4.56468e-08	0.047981	0.058	0.025	0.000789644	General endothelium
smurf1	4.87911e-08	0.0516821	0.069	0.032	0.000844036	General endothelium
dlc1	5.36714e-08	0.0528593	0.071	0.034	0.000928461	General endothelium
hmgb1b	5.50403e-08	0.120264	0.207	0.139	0.000952142	General endothelium
arid3b	6.40409e-08	0.259247	0.305	0.239	0.00110784	General endothelium
rbm14b	6.80108e-08	0.106208	0.153	0.096	0.00117652	General endothelium
tmem30ab	7.14597e-08	0.0753843	0.128	0.075	0.00123618	General endothelium
sri	7.19593e-08	0.168624	0.226	0.157	0.00124482	General endothelium
gch1	7.25459e-08	0.0313559	0.032	0.01	0.00125497	General endothelium
zgc:162730	7.39214e-08	0.124903	0.296	0.211	0.00127877	General endothelium
cdon	9.01771e-08	0.0376622	0.076	0.037	0.00155997	General endothelium
bcl2a	9.62111e-08	0.0310859	0.03	0.01	0.00166436	General endothelium
eif4e2	1.15653e-07	0.0432771	0.044	0.017	0.00200069	General endothelium
CR383676.2	1.18454e-07	0.0457304	0.064	0.03	0.00204914	General endothelium
rhogc	1.26793e-07	0.13982	0.155	0.1	0.0021934	General endothelium
epha7	1.31002e-07	0.0367563	0.044	0.017	0.0022662	General endothelium
chl1a	1.4765e-07	0.031485	0.076	0.037	0.00255419	General endothelium
si:ch73-109d9.2	1.56824e-07	0.0488067	0.054	0.024	0.00271291	General endothelium
atf7b	1.70017e-07	0.0461957	0.055	0.024	0.00294113	General endothelium
fkbp1b	1.71074e-07	0.0400414	0.038	0.014	0.00295941	General endothelium
hp1bp3	1.79604e-07	0.387465	0.402	0.353	0.00310697	General endothelium
prkcbp1l	1.86071e-07	0.0723888	0.1	0.056	0.00321885	General endothelium
strn3	1.87045e-07	0.152816	0.216	0.153	0.00323569	General endothelium
fgfrl1b	1.96851e-07	0.0454798	0.042	0.016	0.00340532	General endothelium
aldh9a1b	2.07447e-07	0.0377457	0.044	0.018	0.00358862	General endothelium
cdh6	2.09386e-07	0.0479476	0.046	0.019	0.00362216	General endothelium
pfkfb3	2.10619e-07	0.0322135	0.036	0.013	0.0036435	General endothelium
MDFIC	2.10625e-07	0.0431163	0.051	0.022	0.00364361	General endothelium
fkbp10b	2.1458e-07	0.0374846	0.041	0.016	0.00371202	General endothelium
kras	2.15334e-07	0.070437	0.094	0.051	0.00372506	General endothelium
acot9.1	2.22646e-07	0.0385232	0.04	0.015	0.00385155	General endothelium
si:dkey-16l2.16	2.43886e-07	0.0641156	0.091	0.049	0.00421898	General endothelium
mxd3	2.45891e-07	0.100178	0.112	0.065	0.00425367	General endothelium
cd82a	2.48343e-07	0.111591	0.085	0.045	0.00429608	General endothelium
mid1ip1b	2.50683e-07	0.0465499	0.058	0.026	0.00433657	General endothelium
march6	2.6796e-07	0.146133	0.219	0.157	0.00463544	General endothelium
fbxl14a	2.74685e-07	0.0784073	0.111	0.064	0.00475178	General endothelium
col9a2	2.75646e-07	0.0308232	0.017	0.004	0.0047684	General endothelium
sufu	2.7906e-07	0.0609877	0.064	0.031	0.00482746	General endothelium
trim105	2.81739e-07	0.0497663	0.069	0.034	0.00487381	General endothelium
efr3bb	2.93877e-07	0.0325467	0.033	0.011	0.00508377	General endothelium
reep3b	3.55141e-07	0.148422	0.176	0.119	0.00614358	General endothelium
tmem189	3.68801e-07	0.12859	0.179	0.121	0.00637989	General endothelium
emilin2a	4.42822e-07	0.0316885	0.026	0.008	0.00766037	General endothelium
txnipa	4.64524e-07	0.455777	0.5	0.471	0.0080358	General endothelium
cd2ap	4.64993e-07	0.0745283	0.146	0.091	0.00804392	General endothelium
vdrb	4.79331e-07	0.0921874	0.079	0.042	0.00829195	General endothelium
thy1	4.85784e-07	0.0741593	0.082	0.044	0.00840357	General endothelium
sept8a	5.0051e-07	0.105256	0.123	0.075	0.00865832	General endothelium
fosab	5.00577e-07	0.218498	0.485	0.42	0.00865948	General endothelium
nuak2	5.45151e-07	0.0320095	0.029	0.01	0.00943057	General endothelium
ehd1b	5.6131e-07	0.26981	0.343	0.279	0.0097101	General endothelium
si:ch211-288g17.3	5.92671e-07	0.284428	0.506	0.477	0.0102526	General endothelium
rasa1a	5.95614e-07	0.0683301	0.093	0.052	0.0103035	General endothelium
gdpd5a	6.32745e-07	0.0593251	0.07	0.035	0.0109459	General endothelium
per1b	6.77897e-07	0.0600363	0.087	0.047	0.0117269	General endothelium
pik3c2a	7.16803e-07	0.0614051	0.096	0.054	0.0124	General endothelium
trim33l	7.21024e-07	0.0465903	0.052	0.023	0.012473	General endothelium
pdk4	7.4881e-07	0.0492776	0.064	0.032	0.0129537	General endothelium
p4ha2	8.03499e-07	0.100569	0.067	0.034	0.0138997	General endothelium
itgb1b	8.08516e-07	0.0393885	0.046	0.02	0.0139865	General endothelium
stk17al	8.15201e-07	0.0460871	0.054	0.025	0.0141022	General endothelium
zgc:162707	8.16597e-07	0.0445745	0.068	0.034	0.0141263	General endothelium
lims1	9.09984e-07	0.203683	0.208	0.153	0.0157418	General endothelium
rab11a	9.24221e-07	0.249123	0.36	0.301	0.0159881	General endothelium
gata2a	1.03881e-06	0.202899	0.193	0.139	0.0179704	General endothelium
tent5ab	1.13319e-06	0.0358012	0.042	0.017	0.019603	General endothelium
znf865	1.16353e-06	0.190046	0.269	0.209	0.0201278	General endothelium
cicb	1.22967e-06	0.0457304	0.062	0.031	0.0212721	General endothelium
si:dkeyp-69b9.6	1.23043e-06	0.0416283	0.046	0.02	0.0212853	General endothelium
cd9a	1.28203e-06	0.0418995	0.034	0.013	0.0221779	General endothelium
cdkn1bb	1.34923e-06	0.258353	0.323	0.264	0.0233403	General endothelium
gsk3b	1.51436e-06	0.0647154	0.103	0.06	0.0261969	General endothelium
metrn	1.74259e-06	0.0393457	0.042	0.018	0.030145	General endothelium
castor2	1.8915e-06	0.0667378	0.054	0.026	0.0327211	General endothelium
maml1	2.2208e-06	0.0357254	0.049	0.022	0.0384177	General endothelium
rhoac	2.5096e-06	0.242215	0.309	0.256	0.0434136	General endothelium
greb1	2.55941e-06	0.0318817	0.038	0.016	0.0442752	General endothelium
rac1b	2.57564e-06	0.052619	0.068	0.035	0.044556	General endothelium
runx1t1	2.59725e-06	0.155411	0.177	0.124	0.0449299	General endothelium
ttyh3a	2.59928e-06	0.0868884	0.153	0.101	0.0449649	General endothelium
nrarpb	2.64698e-06	0.0329147	0.035	0.014	0.0457902	General endothelium
smtnb	2.7283e-06	0.041319	0.051	0.024	0.0471969	General endothelium
osbpl5	2.84427e-06	0.0377902	0.043	0.019	0.0492029	General endothelium
lcor	3.0977e-06	0.032798	0.041	0.017	0.0535872	General endothelium
gdi2	3.47701e-06	0.363687	0.621	0.649	0.0601488	General endothelium
zgc:153184	3.5594e-06	0.0505261	0.059	0.029	0.061574	General endothelium
gemin7	3.73166e-06	0.0923496	0.102	0.061	0.064554	General endothelium
ppp1r9ba	3.95641e-06	0.0436349	0.062	0.032	0.0684419	General endothelium
map3k14a	3.98122e-06	0.0446267	0.059	0.029	0.0688712	General endothelium
limk1b	4.05296e-06	0.0358478	0.045	0.02	0.0701122	General endothelium
cltca	4.09299e-06	0.212797	0.55	0.525	0.0708047	General endothelium
ptmaa	4.58342e-06	0.120554	0.323	0.255	0.0792886	General endothelium
numb	4.59576e-06	0.0422578	0.052	0.025	0.0795021	General endothelium
abhd17c	4.66199e-06	0.071921	0.093	0.054	0.0806478	General endothelium
arpc1a	4.71261e-06	0.22605	0.305	0.25	0.0815234	General endothelium
etv5a	4.8264e-06	0.0371524	0.05	0.023	0.0834918	General endothelium
ehd4	4.96966e-06	0.0675571	0.09	0.052	0.0859701	General endothelium
gabpa	5.11519e-06	0.181058	0.265	0.21	0.0884876	General endothelium
arl13b	5.24694e-06	0.0331137	0.042	0.018	0.0907667	General endothelium
cep131	5.75396e-06	0.0456596	0.065	0.034	0.0995378	General endothelium
grb10b	5.99785e-06	0.0381781	0.038	0.016	0.103757	General endothelium
cdca4	6.44539e-06	0.0763969	0.122	0.078	0.111499	General endothelium
FO905040.1	6.4521e-06	0.0369266	0.043	0.019	0.111615	General endothelium
dlg5a	6.53744e-06	0.0315515	0.042	0.018	0.113091	General endothelium
sos1	6.87871e-06	0.0548807	0.058	0.029	0.118995	General endothelium
golgb1	7.13039e-06	0.167435	0.255	0.196	0.123349	General endothelium
ppt1	7.18317e-06	0.109297	0.29	0.227	0.124262	General endothelium
tpi1b	7.32188e-06	0.217046	0.281	0.225	0.126661	General endothelium
frmd8	7.45409e-06	0.0640025	0.098	0.059	0.128948	General endothelium
matn4	7.81795e-06	0.0625154	0.046	0.022	0.135243	General endothelium
zgc:174268	7.85875e-06	0.0384848	0.051	0.025	0.135948	General endothelium
lin7c	7.87673e-06	0.0587046	0.104	0.063	0.13626	General endothelium
snx18a	7.96126e-06	0.032401	0.046	0.022	0.137722	General endothelium
srebf2	8.21972e-06	0.0919013	0.109	0.069	0.142193	General endothelium
prr12b	8.48573e-06	0.0449857	0.061	0.032	0.146795	General endothelium
fut11	8.75399e-06	0.0325313	0.037	0.016	0.151435	General endothelium
larp6a	8.84309e-06	0.0636658	0.081	0.047	0.152977	General endothelium
zgc:136439	8.92574e-06	0.052687	0.074	0.041	0.154406	General endothelium
tmem181	9.30221e-06	0.0355853	0.042	0.019	0.160919	General endothelium
ppp1r3ca	9.60958e-06	0.0516236	0.056	0.029	0.166236	General endothelium
katna1	9.67695e-06	0.0315515	0.042	0.019	0.167402	General endothelium
acin1a	9.82067e-06	0.279112	0.467	0.44	0.169888	General endothelium
znf1009.1	1.08405e-05	0.0325313	0.037	0.016	0.18753	General endothelium
FAM53C	1.10821e-05	0.0383138	0.052	0.026	0.19171	General endothelium
DDX17	1.11663e-05	0.161658	0.169	0.122	0.193166	General endothelium
slc39a13	1.14141e-05	0.0301558	0.033	0.013	0.197453	General endothelium
zmiz1a	1.14651e-05	0.0865483	0.139	0.092	0.198334	General endothelium
znf609a	1.32166e-05	0.0606302	0.095	0.057	0.228634	General endothelium
tnfaip8l1	1.38363e-05	0.0802687	0.082	0.048	0.239354	General endothelium
prdm11	1.44632e-05	0.0487674	0.067	0.036	0.250199	General endothelium
pard3ab	1.49432e-05	0.0405011	0.05	0.024	0.258503	General endothelium
mtss1	1.60827e-05	0.0399779	0.063	0.034	0.278215	General endothelium
myo9ab	1.61266e-05	0.0435729	0.065	0.036	0.278973	General endothelium
sorbs1	1.62914e-05	0.0596428	0.068	0.037	0.281825	General endothelium
ncoa3	1.63529e-05	0.055918	0.078	0.045	0.28289	General endothelium
gkap1	1.68171e-05	0.0644634	0.096	0.059	0.290919	General endothelium
arpc5a	1.69694e-05	0.167662	0.307	0.253	0.293554	General endothelium
msl2b	1.71113e-05	0.056735	0.078	0.045	0.296009	General endothelium
tcf3b	1.73035e-05	0.140585	0.228	0.175	0.299333	General endothelium
ssh2a	1.75976e-05	0.0920259	0.149	0.102	0.304421	General endothelium
capza1a	1.77324e-05	0.319439	0.384	0.349	0.306753	General endothelium
h3f3c	1.8061e-05	0.434653	0.565	0.592	0.312438	General endothelium
nucb1	1.96605e-05	0.146653	0.252	0.196	0.340107	General endothelium
cntrl	2.01735e-05	0.0319454	0.032	0.013	0.348982	General endothelium
zbed4	2.0581e-05	0.0611747	0.116	0.075	0.356031	General endothelium
grasp	2.0628e-05	0.0412742	0.089	0.053	0.356844	General endothelium
acsf2	2.19932e-05	0.0307997	0.038	0.017	0.38046	General endothelium
tusc2b	2.19959e-05	0.0566455	0.094	0.057	0.380507	General endothelium
ywhaz	2.22033e-05	0.375267	0.59	0.597	0.384096	General endothelium
hist2h2l	2.4676e-05	0.283133	0.279	0.223	0.42687	General endothelium
zgc:175088	2.47886e-05	0.0572556	0.115	0.074	0.428817	General endothelium
zic2b	2.52312e-05	0.0316885	0.018	0.005	0.436475	General endothelium
itsn2b	2.59505e-05	0.161258	0.199	0.15	0.448917	General endothelium
slc10a3	2.63698e-05	0.0506466	0.071	0.04	0.45617	General endothelium
znf1035	2.65719e-05	0.147281	0.22	0.169	0.459668	General endothelium
si:ch73-25f10.6	2.76493e-05	0.0418533	0.059	0.031	0.478305	General endothelium
pik3r3a	2.83047e-05	0.0386149	0.052	0.027	0.489642	General endothelium
si:dkey-17o15.2	2.83698e-05	0.0372514	0.059	0.031	0.490769	General endothelium
abracl	2.84909e-05	0.0368734	0.36	0.287	0.492865	General endothelium
mapk1	2.94011e-05	0.0354634	0.043	0.02	0.508609	General endothelium
map1sa	2.96922e-05	0.0656854	0.126	0.084	0.513646	General endothelium
kif21b	3.01646e-05	0.035557	0.046	0.023	0.521818	General endothelium
wipi1	3.13379e-05	0.0304784	0.034	0.015	0.542114	General endothelium
si:rp71-1g18.1	3.31842e-05	0.0362331	0.041	0.019	0.574053	General endothelium
dad1	3.44862e-05	0.0623534	0.488	0.644	0.596577	General endothelium
dusp22b	3.76787e-05	0.0364308	0.053	0.028	0.651803	General endothelium
pnrc2	3.91667e-05	0.436413	0.713	0.788	0.677544	General endothelium
ptpn21	3.93981e-05	0.0374202	0.056	0.03	0.681548	General endothelium
ganab	4.23585e-05	0.0424946	0.072	0.042	0.73276	General endothelium
vamp3	4.32595e-05	0.0361213	0.309	0.411	0.748345	General endothelium
ube2d2l	4.36745e-05	0.0571995	0.087	0.053	0.755526	General endothelium
rab12	4.68214e-05	0.0418625	0.072	0.042	0.809963	General endothelium
prxl2b	5.27873e-05	0.0419323	0.061	0.034	0.913167	General endothelium
csnk1g1	5.28017e-05	0.0574303	0.089	0.055	0.913417	General endothelium
galnt1	5.39786e-05	0.0648246	0.132	0.09	0.933776	General endothelium
mgat4a	5.53347e-05	0.0435353	0.063	0.035	0.957235	General endothelium
gng5	5.81583e-05	0.413166	0.593	0.64	1	General endothelium
lysmd2	6.09594e-05	0.0395081	0.064	0.036	1	General endothelium
bnip2	6.16941e-05	0.0456948	0.071	0.042	1	General endothelium
dop1b	6.21234e-05	0.0390852	0.059	0.032	1	General endothelium
FAM83G	6.48864e-05	0.0541071	0.08	0.049	1	General endothelium
ccnyl1	6.78309e-05	0.0340316	0.053	0.028	1	General endothelium
slc20a2	7.12816e-05	0.0387441	0.054	0.029	1	General endothelium
acvr1ba	7.22172e-05	0.0324713	0.056	0.031	1	General endothelium
sept7b	7.99329e-05	0.237694	0.35	0.307	1	General endothelium
zgc:77486.1	8.99444e-05	0.0396675	0.074	0.044	1	General endothelium
galnt11	9.32247e-05	0.0331276	0.052	0.028	1	General endothelium
rapgef5b	9.59152e-05	0.0421285	0.06	0.034	1	General endothelium
dusp7	9.80733e-05	0.0349557	0.06	0.034	1	General endothelium
hnrnpa0b	9.80987e-05	0.289393	0.721	0.777	1	General endothelium
ndrg1a	9.84598e-05	0.138292	0.131	0.092	1	General endothelium
zgc:77262	0.000106627	0.0723074	0.113	0.076	1	General endothelium
dync1li1	0.000108778	0.031162	0.046	0.024	1	General endothelium
scaf1	0.000120983	0.133545	0.234	0.187	1	General endothelium
mllt10	0.000131973	0.151048	0.173	0.131	1	General endothelium
mib1	0.000138863	0.0526555	0.09	0.058	1	General endothelium
dyrk1b	0.000140524	0.0467843	0.07	0.042	1	General endothelium
kdm5c	0.000147417	0.133521	0.233	0.186	1	General endothelium
golga7	0.000150313	0.196369	0.209	0.168	1	General endothelium
ppp2r1bb	0.000161595	0.158633	0.238	0.193	1	General endothelium
sh3kbp1	0.000164981	0.0328316	0.058	0.032	1	General endothelium
hopx	0.000167147	0.163428	0.124	0.088	1	General endothelium
siah1	0.000173409	0.0441818	0.07	0.042	1	General endothelium
dync1li2	0.000176653	0.0833764	0.148	0.107	1	General endothelium
pspc1	0.000197761	0.0539778	0.091	0.059	1	General endothelium
kifap3a	0.000198133	0.0486841	0.065	0.039	1	General endothelium
zgc:153675	0.000204304	0.093368	0.115	0.079	1	General endothelium
cyp3c1	0.000206635	0.0320083	0.049	0.026	1	General endothelium
fat1a	0.000221744	0.0324217	0.051	0.028	1	General endothelium
pald1a	0.000224781	0.0347677	0.052	0.029	1	General endothelium
sb:cb81	0.000238107	0.0446966	0.109	0.074	1	General endothelium
actr2a	0.000241083	0.149423	0.318	0.278	1	General endothelium
sorbs2b	0.000245008	0.0341533	0.059	0.034	1	General endothelium
smad6a	0.000257204	0.0328314	0.04	0.02	1	General endothelium
adam19a	0.000258797	0.0306013	0.061	0.036	1	General endothelium
selenom	0.000261898	0.0351009	0.044	0.023	1	General endothelium
adnp2a	0.000264423	0.0367802	0.055	0.032	1	General endothelium
fam168a	0.00027563	0.102117	0.182	0.139	1	General endothelium
fkbp1aa	0.000281368	0.490288	0.727	0.78	1	General endothelium
oga	0.000281815	0.143391	0.229	0.187	1	General endothelium
ppp1r13bb	0.000284718	0.0446107	0.073	0.045	1	General endothelium
cbl	0.000285476	0.0496716	0.097	0.064	1	General endothelium
SERP1	0.000298087	0.155146	0.282	0.24	1	General endothelium
cirbpb	0.000311236	0.391579	0.985	0.957	1	General endothelium
desi2	0.000312466	0.0435489	0.069	0.042	1	General endothelium
llgl2	0.000314948	0.0531508	0.085	0.055	1	General endothelium
calm2b	0.000322696	0.193896	0.52	0.674	1	General endothelium
wdr32	0.000334758	0.0459045	0.076	0.048	1	General endothelium
mark2b	0.000355994	0.0411793	0.074	0.047	1	General endothelium
si:ch211-11k18.4	0.000360734	0.0808248	0.139	0.1	1	General endothelium
wasf2	0.000361905	0.0740557	0.125	0.089	1	General endothelium
znf646	0.000378382	0.0431216	0.082	0.053	1	General endothelium
psph	0.000382554	0.0631587	0.113	0.078	1	General endothelium
si:ch211-140m22.7	0.00039147	0.0420732	0.069	0.042	1	General endothelium
tmem234	0.000399025	0.0426093	0.056	0.033	1	General endothelium
tet2	0.000400622	0.0353345	0.056	0.033	1	General endothelium
hspa12b	0.000411764	0.103305	0.113	0.08	1	General endothelium
pttg1ipb	0.00043625	0.0369144	0.072	0.045	1	General endothelium
gripap1	0.000443763	0.032372	0.053	0.031	1	General endothelium
mark3b	0.000463322	0.0336131	0.062	0.037	1	General endothelium
tbc1d16	0.000473105	0.0327507	0.069	0.043	1	General endothelium
dcun1d2b	0.000477406	0.0303088	0.038	0.02	1	General endothelium
myl9b	0.000487343	0.139818	0.157	0.121	1	General endothelium
rps6ka3a	0.000502519	0.0436505	0.096	0.064	1	General endothelium
oxsr1a	0.000513145	0.177117	0.388	0.361	1	General endothelium
inpp5b	0.000559287	0.0353616	0.05	0.028	1	General endothelium
wu:fi04e12	0.000563176	0.0355289	0.047	0.027	1	General endothelium
cab39l	0.000566873	0.05261	0.112	0.078	1	General endothelium
tnrc6c1	0.000613406	0.100971	0.158	0.12	1	General endothelium
p4ha1b	0.000639042	0.225237	0.119	0.088	1	General endothelium
ralbp1	0.000646663	0.0883687	0.144	0.108	1	General endothelium
kdm2ba	0.000726893	0.0456948	0.132	0.095	1	General endothelium
arhgap10	0.000740193	0.0549976	0.104	0.072	1	General endothelium
vhl	0.00078237	0.0322086	0.053	0.031	1	General endothelium
rnaset2	0.000811894	0.10677	0.199	0.159	1	General endothelium
bcl6aa	0.000815239	0.0335655	0.029	0.014	1	General endothelium
zgc:77849	0.000861649	0.316104	0.362	0.338	1	General endothelium
kdm7ab	0.00087719	0.0604986	0.121	0.087	1	General endothelium
mycla	0.000887408	0.0554556	0.124	0.09	1	General endothelium
cdc34a	0.000910178	0.0339526	0.077	0.05	1	General endothelium
rab40c	0.000917256	0.0475058	0.077	0.05	1	General endothelium
ccdc88c	0.000920022	0.0384103	0.065	0.041	1	General endothelium
mef2aa	0.000929823	0.103659	0.129	0.095	1	General endothelium
phf2	0.000952783	0.0411396	0.07	0.045	1	General endothelium
znf384l	0.00102886	0.0373758	0.051	0.03	1	General endothelium
gamt	0.00106053	0.0654525	0.144	0.107	1	General endothelium
fbxo45	0.00109905	0.0371326	0.081	0.054	1	General endothelium
kdm6ba	0.00115947	0.200906	0.403	0.383	1	General endothelium
creb3l3l	0.00120972	0.0513146	0.095	0.065	1	General endothelium
ssbp3b	0.00121924	0.0751389	0.146	0.11	1	General endothelium
MYADM	0.00122246	0.0811839	0.158	0.121	1	General endothelium
bmp2k	0.00123265	0.0352613	0.056	0.035	1	General endothelium
lbx2	0.00127588	0.0367563	0.036	0.02	1	General endothelium
cyhr1	0.0012763	0.0456948	0.061	0.038	1	General endothelium
tert	0.00127746	0.0498125	0.079	0.053	1	General endothelium
smarce1	0.00129489	0.0400902	0.387	0.48	1	General endothelium
CABZ01066694.1	0.00131355	0.0675693	0.074	0.049	1	General endothelium
smox	0.00131993	0.0464947	0.056	0.035	1	General endothelium
phc2a	0.00134008	0.0389152	0.055	0.034	1	General endothelium
specc1la	0.00142558	0.0487662	0.133	0.098	1	General endothelium
hmgn6	0.00143869	0.302257	0.814	0.852	1	General endothelium
sirt2	0.00149991	0.0542079	0.114	0.082	1	General endothelium
si:ch211-119e14.1	0.00151065	0.0333829	0.053	0.032	1	General endothelium
hnrpkl	0.00151883	0.182011	0.26	0.227	1	General endothelium
ptp4a2a	0.00160299	0.120343	0.151	0.118	1	General endothelium
pdia3	0.00166519	0.114017	0.317	0.272	1	General endothelium
cpne1	0.0017347	0.144169	0.258	0.223	1	General endothelium
rab10	0.00192029	0.0307845	0.257	0.328	1	General endothelium
zgc:110626	0.00196987	0.0798425	0.116	0.086	1	General endothelium
snx9b	0.00198691	0.0905821	0.142	0.109	1	General endothelium
rassf1	0.0021776	0.145577	0.333	0.408	1	General endothelium
arf5	0.0023936	0.214305	0.312	0.286	1	General endothelium
ier5	0.00249915	0.340689	0.388	0.372	1	General endothelium
zgc:114200	0.00251728	0.0345077	0.071	0.047	1	General endothelium
csnk1db	0.00255101	0.104633	0.187	0.152	1	General endothelium
ptbp3	0.00261185	0.0727227	0.128	0.096	1	General endothelium
tbcb	0.00268094	0.142676	0.209	0.175	1	General endothelium
sav1	0.0027868	0.0411847	0.09	0.064	1	General endothelium
ndfip2	0.00287695	0.0353389	0.079	0.054	1	General endothelium
ska2	0.00288838	0.0788646	0.152	0.119	1	General endothelium
npl	0.00291501	0.0937891	0.14	0.108	1	General endothelium
ythdf1	0.00294936	0.0695384	0.152	0.119	1	General endothelium
prkab1b	0.00295327	0.0843424	0.172	0.137	1	General endothelium
ppp2r5cb	0.0029969	0.0358111	0.071	0.048	1	General endothelium
rtca	0.00299942	0.104106	0.166	0.134	1	General endothelium
ywhae2	0.00331427	0.107157	0.207	0.172	1	General endothelium
mkrn4	0.0034038	0.0409399	0.061	0.04	1	General endothelium
apex1	0.00340577	0.127244	0.242	0.206	1	General endothelium
slc16a10	0.00348455	0.0720706	0.192	0.248	1	General endothelium
snx17	0.00355308	0.0320546	0.089	0.063	1	General endothelium
zfand5a	0.00355671	0.0399122	0.08	0.056	1	General endothelium
BX936337.1	0.00358191	0.0872508	0.204	0.168	1	General endothelium
asph	0.00374209	0.0363835	0.172	0.133	1	General endothelium
fblim1	0.00375254	0.0989971	0.102	0.075	1	General endothelium
cst14a.2	0.00389227	0.253727	0.392	0.379	1	General endothelium
rcbtb1	0.00393301	0.030084	0.047	0.029	1	General endothelium
pdia5	0.00407667	0.107285	0.146	0.116	1	General endothelium
aoc2	0.00407677	0.0307475	0.028	0.015	1	General endothelium
syne3	0.00416939	0.0361557	0.056	0.037	1	General endothelium
scrib	0.00417179	0.0408999	0.087	0.062	1	General endothelium
rab6a	0.00419276	0.0500923	0.109	0.081	1	General endothelium
hnrnpm	0.00422518	0.123039	0.252	0.217	1	General endothelium
snx5	0.00430477	0.196905	0.384	0.365	1	General endothelium
fdps	0.00435148	0.0390408	0.104	0.076	1	General endothelium
mgst3a	0.00441736	0.0614286	0.109	0.082	1	General endothelium
zgc:113921	0.00456405	0.0342293	0.071	0.049	1	General endothelium
AL935186.9	0.00471966	0.0977453	0.227	0.193	1	General endothelium
slc37a2	0.00500427	0.0362126	0.105	0.077	1	General endothelium
fam193a	0.00514584	0.0641154	0.147	0.115	1	General endothelium
slc25a5	0.005332	0.22992	1	0.994	1	General endothelium
atf7ip	0.00584758	0.169646	0.277	0.246	1	General endothelium
zgc:123010	0.00590297	0.0440027	0.079	0.056	1	General endothelium
kdelr2b	0.00594531	0.0997599	0.236	0.201	1	General endothelium
sdc2	0.00597006	0.0402189	0.064	0.044	1	General endothelium
selenow1	0.00611281	0.15237	0.458	0.46	1	General endothelium
yipf4	0.00612792	0.0757587	0.148	0.118	1	General endothelium
mef2d	0.00771627	0.104285	0.163	0.133	1	General endothelium
prnprs3	0.00795648	0.0345309	0.059	0.04	1	General endothelium
fbxo11a.1	0.00801608	0.0403269	0.081	0.059	1	General endothelium
khdrbs1a	0.00831831	0.26031	0.863	0.867	1	General endothelium
nudt21	0.00833286	0.0531213	0.177	0.144	1	General endothelium
rnf44	0.00841708	0.088094	0.186	0.154	1	General endothelium
sec61a1	0.00844113	0.263351	0.388	0.38	1	General endothelium
nrbp1	0.00953289	0.0548742	0.128	0.1	1	General endothelium
rcn1	0.0103693	0.0373313	0.098	0.074	1	General endothelium
fosb	0.0106481	0.0326864	0.056	0.038	1	General endothelium
hbp1	0.0110095	0.0370931	0.052	0.035	1	General endothelium
h2afx1	0.0113657	0.446319	0.604	0.614	1	General endothelium
chd7	0.0115552	0.233858	0.368	0.354	1	General endothelium
map1lc3b	0.0116041	0.130373	0.204	0.178	1	General endothelium
zgc:153867	0.0119172	0.450931	0.981	0.925	1	General endothelium
fam13b	0.0124206	0.0401698	0.107	0.082	1	General endothelium
tmem251	0.0129093	0.0306251	0.076	0.055	1	General endothelium
zbtb18	0.0131651	0.046836	0.095	0.072	1	General endothelium
ppp1r14bb	0.013742	0.176681	0.381	0.367	1	General endothelium
sbf1	0.0153028	0.0404567	0.104	0.08	1	General endothelium
glud1a	0.0153979	0.0312171	0.062	0.044	1	General endothelium
fam120c	0.0157384	0.0412171	0.108	0.084	1	General endothelium
hnrnpa0l.1	0.0159203	0.231573	0.977	0.933	1	General endothelium
taok2a	0.0159664	0.0620728	0.156	0.128	1	General endothelium
clcn5a	0.016832	0.0305813	0.071	0.052	1	General endothelium
pip4k2ca	0.0173293	0.0535093	0.117	0.093	1	General endothelium
fam3a	0.0173807	0.0809898	0.143	0.118	1	General endothelium
chd2	0.0176633	0.134259	0.22	0.195	1	General endothelium
sfpq	0.0181607	0.096732	0.237	0.21	1	General endothelium
prkcsh	0.018798	0.0626992	0.126	0.102	1	General endothelium
sh3glb1a	0.0192469	0.0326433	0.089	0.068	1	General endothelium
h3f3b.1.1	0.0193026	0.113093	0.544	0.682	1	General endothelium
cebpg	0.0201019	0.0523129	0.105	0.083	1	General endothelium
serf2	0.0211521	0.26747	0.441	0.55	1	General endothelium
tmem134	0.0212646	0.124332	0.214	0.19	1	General endothelium
zgc:153115	0.0215853	0.0386399	0.114	0.09	1	General endothelium
arf1	0.0217369	0.105551	0.247	0.222	1	General endothelium
rpn1	0.0222112	0.0780627	0.326	0.395	1	General endothelium
sept9b	0.0234518	0.049915	0.13	0.105	1	General endothelium
sept6	0.0249037	0.277052	0.424	0.428	1	General endothelium
rab1ab	0.024958	0.0567843	0.534	0.655	1	General endothelium
znf292a	0.0261525	0.0450886	0.103	0.081	1	General endothelium
prkcaa	0.026744	0.0354082	0.042	0.028	1	General endothelium
tuba8l	0.02682	0.0465085	0.578	0.684	1	General endothelium
map3k7	0.0270798	0.0781694	0.192	0.166	1	General endothelium
ube2q2	0.0272482	0.036355	0.116	0.093	1	General endothelium
dpf2l	0.027665	0.0495012	0.119	0.096	1	General endothelium
si:ch211-160o17.2	0.0279224	0.0342075	0.071	0.053	1	General endothelium
calm2a	0.0289607	0.315836	0.375	0.368	1	General endothelium
brd1b	0.0290392	0.0665147	0.178	0.152	1	General endothelium
cant1a	0.0307753	0.0369033	0.085	0.065	1	General endothelium
zgc:55558	0.0308259	0.0453179	0.084	0.065	1	General endothelium
mtdha	0.0312228	0.223538	0.388	0.401	1	General endothelium
sdr16c5b	0.0325638	0.0320902	0.085	0.065	1	General endothelium
pafah1b1b	0.0343033	0.0717007	0.166	0.142	1	General endothelium
btbd10b	0.0346195	0.251328	0.273	0.262	1	General endothelium
ccnt1	0.0347296	0.0439061	0.14	0.116	1	General endothelium
snx6	0.0348559	0.0596829	0.17	0.146	1	General endothelium
kmt2bb	0.0358802	0.0699231	0.307	0.367	1	General endothelium
fcho2	0.0373106	0.0508632	0.121	0.099	1	General endothelium
golt1bb	0.0394977	0.0407868	0.117	0.096	1	General endothelium
ptpn11a	0.0406753	0.0722325	0.156	0.133	1	General endothelium
unc50	0.0414841	0.0419793	0.091	0.073	1	General endothelium
si:ch211-196l7.4	0.0438734	0.0804635	0.336	0.388	1	General endothelium
rad21a	0.0442354	0.0802557	0.393	0.472	1	General endothelium
zgc:113263	0.0467808	0.0314461	0.076	0.059	1	General endothelium
acsl3b	0.0475095	0.0435448	0.103	0.083	1	General endothelium
rnf38	0.049243	0.0323433	0.086	0.068	1	General endothelium
pdcd6	0.0500108	0.0419863	0.106	0.086	1	General endothelium
calub	0.0526293	0.0397417	0.077	0.06	1	General endothelium
tob1b	0.0530521	0.0701993	0.203	0.18	1	General endothelium
CABZ01026681.1	0.0536198	0.0348099	0.063	0.048	1	General endothelium
gpx4b	0.0546776	0.126116	0.547	0.673	1	General endothelium
cds2	0.0559681	0.0480002	0.105	0.086	1	General endothelium
atl3	0.0569949	0.0334988	0.077	0.06	1	General endothelium
si:dkey-30c15.10	0.0573644	0.0313187	0.085	0.067	1	General endothelium
sesn1	0.0574076	0.0849064	0.122	0.104	1	General endothelium
hif1al	0.0577578	0.0336579	0.213	0.255	1	General endothelium
vkorc1l1	0.0629434	0.054592	0.141	0.121	1	General endothelium
stx4	0.0629595	0.064243	0.149	0.129	1	General endothelium
ube2e1	0.0634328	0.0340675	0.258	0.307	1	General endothelium
exoc1	0.0662969	0.0412396	0.089	0.072	1	General endothelium
PPP2CA	0.0668757	0.0499238	0.168	0.205	1	General endothelium
hic1l	0.066904	0.0788811	0.15	0.131	1	General endothelium
map2k6	0.0673346	0.140732	0.235	0.221	1	General endothelium
b4galt6	0.0677245	0.0943191	0.166	0.147	1	General endothelium
ubtfl	0.0682368	0.0351679	0.124	0.105	1	General endothelium
akt1s1	0.0689352	0.118181	0.132	0.116	1	General endothelium
sptan1	0.0696197	0.0896968	0.307	0.362	1	General endothelium
pfkfb4b	0.0728497	0.129115	0.231	0.214	1	General endothelium
tor1	0.073073	0.067951	0.149	0.13	1	General endothelium
cdc14b	0.0740276	0.0474725	0.073	0.058	1	General endothelium
ywhaqb	0.0746039	0.122813	0.526	0.646	1	General endothelium
BX548028.1	0.075608	0.181299	0.094	0.118	1	General endothelium
serinc1	0.0767698	0.0427192	0.126	0.107	1	General endothelium
degs1	0.078352	0.236834	0.331	0.331	1	General endothelium
slc25a36a	0.0789833	0.0365075	0.12	0.101	1	General endothelium
jdp2b	0.0802692	0.126185	0.168	0.149	1	General endothelium
csde1	0.0845203	0.0672722	0.404	0.467	1	General endothelium
mapk3	0.0881396	0.0302603	0.07	0.056	1	General endothelium
taf13	0.0896899	0.042816	0.262	0.307	1	General endothelium
ilf3b	0.0911515	0.0669336	0.325	0.383	1	General endothelium
mapre1b	0.0913876	0.0738541	0.336	0.395	1	General endothelium
aqp8a.1	0	3.59542	0.873	0.032	0	Hemogenic endothelium
dab2	0	2.47367	0.847	0.097	0	Hemogenic endothelium
stab2	0	2.42974	0.895	0.122	0	Hemogenic endothelium
glula	0	2.31474	0.637	0.063	0	Hemogenic endothelium
mcamb	0	1.6897	0.81	0.102	0	Hemogenic endothelium
cx43	0	1.50411	0.72	0.083	0	Hemogenic endothelium
ap1s3b	0	1.44775	0.601	0.044	0	Hemogenic endothelium
hoxb9a	0	1.04477	0.448	0.014	0	Hemogenic endothelium
hoxa9a	0	0.570428	0.32	0.007	0	Hemogenic endothelium
hoxd10a	0	0.547785	0.334	0.01	0	Hemogenic endothelium
hoxc11b	0	0.470876	0.238	0.001	0	Hemogenic endothelium
hoxb7a	4.47093e-307	0.716623	0.36	0.013	7.73426e-303	Hemogenic endothelium
etv2	1.39926e-304	2.5226	0.861	0.138	2.42059e-300	Hemogenic endothelium
sox7	7.38831e-295	1.86154	0.748	0.097	1.2781e-290	Hemogenic endothelium
cx30.3	7.21801e-288	0.446343	0.258	0.005	1.24864e-283	Hemogenic endothelium
cdh5	7.29806e-288	1.86024	0.924	0.158	1.26249e-283	Hemogenic endothelium
hoxa11b	6.00655e-287	0.731276	0.371	0.017	1.03907e-282	Hemogenic endothelium
tpte	6.65425e-283	0.970551	0.547	0.048	1.15112e-278	Hemogenic endothelium
agtr2	1.05079e-276	0.747424	0.368	0.017	1.81776e-272	Hemogenic endothelium
hoxd9a	5.26366e-267	0.620976	0.323	0.013	9.1056e-263	Hemogenic endothelium
nova2	4.95172e-258	1.59799	0.762	0.115	8.56598e-254	Hemogenic endothelium
tie1	2.29951e-255	1.4528	0.728	0.106	3.97792e-251	Hemogenic endothelium
zcchc24	8.75573e-253	0.927334	0.499	0.044	1.51465e-248	Hemogenic endothelium
fscn1a	3.44844e-248	1.52058	0.643	0.083	5.96545e-244	Hemogenic endothelium
slit3	3.30947e-247	0.876696	0.467	0.039	5.72505e-243	Hemogenic endothelium
slc22a7b.1	3.8369e-244	0.543319	0.3	0.012	6.63745e-240	Hemogenic endothelium
myct1a	2.24664e-238	1.18284	0.603	0.074	3.88647e-234	Hemogenic endothelium
flt4	7.60033e-237	1.26245	0.635	0.083	1.31478e-232	Hemogenic endothelium
pald1b	1.08818e-236	0.465306	0.246	0.007	1.88244e-232	Hemogenic endothelium
si:ch211-156j16.1	2.13334e-235	2.13405	0.807	0.152	3.69047e-231	Hemogenic endothelium
kalrnb	7.36058e-235	0.864294	0.365	0.022	1.27331e-230	Hemogenic endothelium
mafa	2.843e-234	0.636721	0.346	0.02	4.91811e-230	Hemogenic endothelium
tjp1a	3.56248e-233	1.55327	0.751	0.128	6.16274e-229	Hemogenic endothelium
egfl7	7.38433e-233	1.52525	0.771	0.127	1.27742e-228	Hemogenic endothelium
ctsla	5.77539e-232	2.47976	0.949	0.27	9.99085e-228	Hemogenic endothelium
tpm4a	2.61891e-229	2.23881	0.972	0.269	4.53045e-225	Hemogenic endothelium
clec14a	3.00642e-226	1.30458	0.739	0.12	5.2008e-222	Hemogenic endothelium
krt18a.1	3.97447e-222	2.23876	0.907	0.214	6.87544e-218	Hemogenic endothelium
marcksl1a	2.82188e-221	2.84009	0.997	0.349	4.88156e-217	Hemogenic endothelium
rbpms2a	2.95718e-216	0.798095	0.442	0.04	5.11563e-212	Hemogenic endothelium
gpr182	6.31499e-214	1.09609	0.598	0.08	1.09243e-209	Hemogenic endothelium
cxcl12b	4.52491e-211	1.10429	0.425	0.038	7.82765e-207	Hemogenic endothelium
lhfpl6	2.2011e-210	0.745773	0.422	0.038	3.80768e-206	Hemogenic endothelium
kdrl	1.06661e-206	1.09992	0.618	0.09	1.84514e-202	Hemogenic endothelium
cldn5b	2.09057e-206	1.59839	0.635	0.098	3.61647e-202	Hemogenic endothelium
notch3	2.1006e-205	0.865219	0.45	0.045	3.63383e-201	Hemogenic endothelium
arhgef9b	2.62767e-205	0.74964	0.482	0.052	4.54561e-201	Hemogenic endothelium
her12	1.9886e-198	1.07129	0.244	0.01	3.44007e-194	Hemogenic endothelium
antxr1c	4.78176e-197	0.918649	0.501	0.061	8.27197e-193	Hemogenic endothelium
fabp11a	1.10843e-196	1.26706	0.439	0.046	1.91748e-192	Hemogenic endothelium
sash1a	4.86554e-193	1.11298	0.652	0.112	8.41691e-189	Hemogenic endothelium
plk2b	4.7216e-187	1.42438	0.601	0.097	8.1679e-183	Hemogenic endothelium
ramp2	6.68485e-182	1.08652	0.62	0.103	1.15641e-177	Hemogenic endothelium
rbpms2b	1.04364e-181	0.631111	0.309	0.021	1.80539e-177	Hemogenic endothelium
dact2	4.65482e-179	0.626208	0.326	0.025	8.05238e-175	Hemogenic endothelium
ccdc85b	8.62404e-178	0.748589	0.445	0.051	1.49187e-173	Hemogenic endothelium
scarf1	1.65319e-176	1.06914	0.578	0.092	2.85985e-172	Hemogenic endothelium
hoxb8a	1.55351e-175	0.513226	0.286	0.018	2.68742e-171	Hemogenic endothelium
micall2a	6.4196e-174	0.622696	0.351	0.031	1.11053e-169	Hemogenic endothelium
postnb	1.60204e-173	1.47457	0.618	0.106	2.77137e-169	Hemogenic endothelium
si:ch73-234b20.5	4.30544e-173	0.929594	0.453	0.057	7.44798e-169	Hemogenic endothelium
mmrn2a	1.16392e-167	0.452435	0.272	0.017	2.01347e-163	Hemogenic endothelium
wasf3b	1.00279e-166	1.30541	0.569	0.099	1.73472e-162	Hemogenic endothelium
appb	1.08969e-165	0.689187	0.377	0.039	1.88505e-161	Hemogenic endothelium
hoxc9a	4.63451e-165	0.256721	0.144	0.002	8.01724e-161	Hemogenic endothelium
ldb2a	1.17869e-164	0.909177	0.516	0.077	2.03902e-160	Hemogenic endothelium
asap1b	2.64702e-163	1.15867	0.643	0.13	4.57908e-159	Hemogenic endothelium
tmem88a	2.85314e-160	1.30388	0.643	0.122	4.93565e-156	Hemogenic endothelium
lmo4a	5.59914e-159	1.202	0.592	0.112	9.68595e-155	Hemogenic endothelium
id1	2.26563e-157	2.04331	0.813	0.222	3.91932e-153	Hemogenic endothelium
fli1a	1.3733e-156	1.42109	0.802	0.235	2.37567e-152	Hemogenic endothelium
jam3b	2.06081e-156	1.04483	0.561	0.098	3.56499e-152	Hemogenic endothelium
robo3	8.22187e-156	0.623678	0.337	0.032	1.4223e-151	Hemogenic endothelium
mafba	1.05915e-154	1.43513	0.595	0.118	1.83223e-150	Hemogenic endothelium
rgl1	3.55308e-153	0.840634	0.501	0.079	6.14647e-149	Hemogenic endothelium
dusp5	1.86055e-152	2.01072	0.844	0.279	3.21857e-148	Hemogenic endothelium
tnfaip2b	1.4884e-150	0.712919	0.334	0.033	2.57478e-146	Hemogenic endothelium
smad3a	4.64965e-150	0.816547	0.476	0.072	8.04343e-146	Hemogenic endothelium
colec12	9.74797e-150	0.827623	0.484	0.074	1.6863e-145	Hemogenic endothelium
cdx4	1.37787e-149	0.27238	0.147	0.004	2.38357e-145	Hemogenic endothelium
rasip1	2.1137e-149	1.0455	0.49	0.077	3.6565e-145	Hemogenic endothelium
esama	2.14627e-149	0.989427	0.462	0.068	3.71283e-145	Hemogenic endothelium
smad5	3.1107e-149	0.825368	0.476	0.074	5.38119e-145	Hemogenic endothelium
csrp2	1.2123e-148	0.629714	0.286	0.023	2.09717e-144	Hemogenic endothelium
sox13	4.73481e-147	0.618706	0.346	0.036	8.19074e-143	Hemogenic endothelium
mef2cb	1.65682e-144	0.820175	0.516	0.088	2.86614e-140	Hemogenic endothelium
fmnl3	5.57269e-143	0.667224	0.462	0.07	9.6402e-139	Hemogenic endothelium
she	5.19284e-142	0.627756	0.38	0.047	8.9831e-138	Hemogenic endothelium
lhx6	3.06338e-141	0.211484	0.133	0.003	5.29935e-137	Hemogenic endothelium
mylk5	2.32047e-140	0.622387	0.346	0.039	4.01418e-136	Hemogenic endothelium
cd81a	4.41116e-139	1.56181	0.81	0.254	7.63087e-135	Hemogenic endothelium
pde4ba	1.93776e-138	0.876407	0.448	0.069	3.35213e-134	Hemogenic endothelium
rab11bb	7.96096e-138	0.986577	0.518	0.092	1.37717e-133	Hemogenic endothelium
fli1b	2.70282e-136	1.24041	0.708	0.187	4.6756e-132	Hemogenic endothelium
si:dkeyp-97a10.2	1.74001e-134	0.970497	0.473	0.08	3.01004e-130	Hemogenic endothelium
ushbp1	1.84246e-134	0.595274	0.351	0.042	3.18726e-130	Hemogenic endothelium
jam2a	2.51182e-134	0.824492	0.363	0.046	4.3452e-130	Hemogenic endothelium
ndnf	1.80822e-133	0.678098	0.28	0.026	3.12805e-129	Hemogenic endothelium
stab1	1.92487e-133	0.480284	0.348	0.041	3.32984e-129	Hemogenic endothelium
hoxa9b	1.14899e-131	0.201295	0.125	0.003	1.98764e-127	Hemogenic endothelium
gdf6a	2.69499e-131	0.547631	0.34	0.04	4.66206e-127	Hemogenic endothelium
tmem119b	8.20501e-131	0.401714	0.235	0.017	1.41938e-126	Hemogenic endothelium
flrt3	2.59646e-130	0.76177	0.385	0.053	4.49161e-126	Hemogenic endothelium
mrc1a	9.10658e-130	0.477525	0.309	0.033	1.57535e-125	Hemogenic endothelium
serpinh1b	1.10607e-129	1.55924	0.394	0.056	1.91339e-125	Hemogenic endothelium
slc22a7b.2	1.18275e-129	0.199777	0.105	0.001	2.04604e-125	Hemogenic endothelium
si:dkey-52l18.4	2.32626e-129	0.912397	0.51	0.096	4.02419e-125	Hemogenic endothelium
dysf	3.61791e-128	0.575885	0.365	0.048	6.25862e-124	Hemogenic endothelium
exoc6	5.64614e-128	1.04561	0.555	0.121	9.76725e-124	Hemogenic endothelium
slc40a1	6.75072e-125	0.530968	0.32	0.038	1.16781e-120	Hemogenic endothelium
hvcn1	9.50459e-125	0.559826	0.365	0.05	1.6442e-120	Hemogenic endothelium
notch1a	1.66014e-124	0.617573	0.382	0.054	2.87188e-120	Hemogenic endothelium
nr2f2	2.84008e-124	0.791526	0.45	0.076	4.91305e-120	Hemogenic endothelium
cdc42ep5	1.21361e-123	0.73429	0.439	0.072	2.09943e-119	Hemogenic endothelium
si:ch211-248e11.2	3.61391e-123	0.624755	0.354	0.047	6.2517e-119	Hemogenic endothelium
fgfrl1b	7.7212e-123	0.368813	0.187	0.011	1.33569e-118	Hemogenic endothelium
jpt1b	2.05308e-120	0.997372	0.626	0.153	3.55163e-116	Hemogenic endothelium
rhoca	2.43124e-120	0.966658	0.558	0.123	4.2058e-116	Hemogenic endothelium
snx11	3.54375e-119	0.635602	0.371	0.054	6.13034e-115	Hemogenic endothelium
zgc:162707	5.03484e-119	0.53208	0.266	0.027	8.70977e-115	Hemogenic endothelium
nos1apa.1	2.18905e-118	0.490244	0.329	0.042	3.78683e-114	Hemogenic endothelium
fzd2	4.70214e-118	0.575807	0.348	0.048	8.13422e-114	Hemogenic endothelium
tek	1.91273e-115	0.965392	0.476	0.094	3.30883e-111	Hemogenic endothelium
npl	1.2659e-113	0.942811	0.467	0.094	2.18987e-109	Hemogenic endothelium
tpd52l1	8.33219e-113	0.546075	0.283	0.032	1.44139e-108	Hemogenic endothelium
afap1l1b	2.02027e-112	0.896106	0.473	0.093	3.49487e-108	Hemogenic endothelium
map4k2	2.39279e-112	0.445333	0.255	0.026	4.13928e-108	Hemogenic endothelium
hoxc3a	6.07145e-112	0.388836	0.207	0.016	1.0503e-107	Hemogenic endothelium
smox	7.79568e-112	0.447479	0.258	0.026	1.34857e-107	Hemogenic endothelium
rac1a	1.17967e-110	1.03422	0.524	0.119	2.04072e-106	Hemogenic endothelium
afdna	2.13034e-110	0.738197	0.507	0.107	3.68527e-106	Hemogenic endothelium
gli2a	7.58762e-110	0.343272	0.224	0.02	1.31258e-105	Hemogenic endothelium
sypl2a	8.28824e-110	1.05636	0.564	0.146	1.43378e-105	Hemogenic endothelium
akr1a1b	1.5348e-109	0.772522	0.428	0.08	2.65504e-105	Hemogenic endothelium
qkia	1.57346e-109	1.84109	0.943	0.661	2.72193e-105	Hemogenic endothelium
hoxb3a	1.62191e-109	0.534279	0.303	0.038	2.80574e-105	Hemogenic endothelium
tpcn3	1.23753e-107	0.251802	0.173	0.011	2.14081e-103	Hemogenic endothelium
kirrel3l	1.95629e-106	0.660051	0.45	0.085	3.38419e-102	Hemogenic endothelium
tspan18b	9.70924e-105	0.858275	0.476	0.103	1.6796e-100	Hemogenic endothelium
ecscr	9.86001e-105	0.753545	0.354	0.056	1.70568e-100	Hemogenic endothelium
hoxd12a	1.50176e-104	0.179665	0.102	0.002	2.5979e-100	Hemogenic endothelium
arap3	6.17934e-104	0.711717	0.411	0.076	1.06896e-99	Hemogenic endothelium
erfl3	9.13783e-104	0.55453	0.351	0.055	1.58075e-99	Hemogenic endothelium
krt8	1.55264e-102	1.35353	0.827	0.33	2.68591e-98	Hemogenic endothelium
rasal2	2.76576e-102	0.416437	0.28	0.035	4.7845e-98	Hemogenic endothelium
sptbn1	1.01353e-101	0.421117	0.323	0.046	1.75331e-97	Hemogenic endothelium
arhgap27l	3.72446e-101	0.444309	0.3	0.04	6.44294e-97	Hemogenic endothelium
si:dkey-73n10.1	5.84605e-101	0.415048	0.272	0.033	1.01131e-96	Hemogenic endothelium
lpar2a	7.20445e-101	0.464371	0.28	0.036	1.2463e-96	Hemogenic endothelium
akap12b	2.30126e-100	1.0038	0.68	0.2	3.98095e-96	Hemogenic endothelium
pora	3.23391e-100	0.590909	0.368	0.063	5.59435e-96	Hemogenic endothelium
cald1a	2.46309e-99	0.590654	0.354	0.058	4.26089e-95	Hemogenic endothelium
si:ch73-364h19.1	4.3951e-99	0.37304	0.201	0.017	7.60309e-95	Hemogenic endothelium
hoxc11a	4.74056e-99	0.142178	0.082	0.001	8.2007e-95	Hemogenic endothelium
sept2	1.50151e-98	1.14121	0.652	0.211	2.59746e-94	Hemogenic endothelium
CU570769.1	3.52146e-97	0.62172	0.323	0.049	6.09178e-93	Hemogenic endothelium
jmjd1cb	1.1779e-96	0.767388	0.484	0.114	2.03765e-92	Hemogenic endothelium
fkbp9	4.7472e-96	0.632637	0.394	0.074	8.21218e-92	Hemogenic endothelium
plekhg2	1.05304e-95	0.361033	0.227	0.024	1.82165e-91	Hemogenic endothelium
stox2a	1.33738e-95	0.490309	0.314	0.047	2.31354e-91	Hemogenic endothelium
rab13	1.61671e-95	0.46706	0.32	0.049	2.79675e-91	Hemogenic endothelium
hey2	6.28054e-95	0.515343	0.241	0.027	1.08647e-90	Hemogenic endothelium
snx8a	1.59196e-94	0.506457	0.289	0.04	2.75392e-90	Hemogenic endothelium
pfn2l	1.70398e-94	1.02295	0.691	0.24	2.94771e-90	Hemogenic endothelium
macf1a	2.79005e-94	0.799176	0.507	0.127	4.82651e-90	Hemogenic endothelium
plpp3	4.75131e-94	0.712771	0.408	0.083	8.21928e-90	Hemogenic endothelium
zeb1b	9.6762e-94	0.465781	0.303	0.045	1.67389e-89	Hemogenic endothelium
rhoub	2.51514e-93	0.261847	0.173	0.013	4.35095e-89	Hemogenic endothelium
rock2b.1	4.27775e-93	0.338036	0.232	0.026	7.40007e-89	Hemogenic endothelium
gchfr	8.30572e-93	0.160346	0.105	0.004	1.43681e-88	Hemogenic endothelium
lfng	2.4284e-91	0.902667	0.439	0.098	4.20089e-87	Hemogenic endothelium
si:dkey-51a16.9	2.85805e-91	0.221169	0.164	0.012	4.94413e-87	Hemogenic endothelium
tead1b	1.72547e-90	0.613818	0.354	0.063	2.98489e-86	Hemogenic endothelium
cavin2b	3.58012e-90	0.754059	0.374	0.07	6.19326e-86	Hemogenic endothelium
mafbb	4.56666e-89	0.967435	0.598	0.174	7.89986e-85	Hemogenic endothelium
lama4	8.5335e-89	0.460334	0.314	0.051	1.47621e-84	Hemogenic endothelium
tmem88b	1.22098e-88	0.902431	0.414	0.086	2.11216e-84	Hemogenic endothelium
tfec	1.38658e-88	0.375315	0.224	0.025	2.39864e-84	Hemogenic endothelium
mmp2	4.14791e-88	0.452448	0.278	0.04	7.17546e-84	Hemogenic endothelium
cnn3a	2.59446e-87	0.659205	0.422	0.091	4.48815e-83	Hemogenic endothelium
fgfr4	3.40514e-87	0.674706	0.303	0.049	5.89056e-83	Hemogenic endothelium
msna	8.71059e-87	1.39499	0.952	0.677	1.50685e-82	Hemogenic endothelium
aplnra	1.9209e-86	0.525326	0.3	0.047	3.32297e-82	Hemogenic endothelium
atp1b1a	4.06533e-86	1.79309	0.793	0.412	7.03262e-82	Hemogenic endothelium
rin3	4.39995e-86	0.641942	0.399	0.085	7.61147e-82	Hemogenic endothelium
iqsec1b	1.33792e-84	0.387795	0.258	0.036	2.31447e-80	Hemogenic endothelium
apoc1	1.41475e-84	1.94758	0.326	0.06	2.44738e-80	Hemogenic endothelium
ppp1r9alb	3.33806e-84	0.338304	0.19	0.019	5.77451e-80	Hemogenic endothelium
arhgap29b	8.97188e-84	0.698056	0.442	0.106	1.55205e-79	Hemogenic endothelium
ppp1r13ba	1.30326e-83	0.4161	0.263	0.038	2.25452e-79	Hemogenic endothelium
aplnrb	1.34133e-83	0.897906	0.425	0.096	2.32037e-79	Hemogenic endothelium
yap1	1.59254e-83	0.41174	0.295	0.047	2.75493e-79	Hemogenic endothelium
rab8b	9.95664e-83	0.853414	0.552	0.165	1.7224e-78	Hemogenic endothelium
myl6	1.61955e-82	0.650053	0.351	0.068	2.80166e-78	Hemogenic endothelium
hoxa10b	2.67384e-82	0.180565	0.119	0.006	4.62547e-78	Hemogenic endothelium
hoxc6b	1.053e-81	0.201868	0.139	0.009	1.82158e-77	Hemogenic endothelium
cdc42l	1.18879e-81	1.20183	0.734	0.305	2.05649e-77	Hemogenic endothelium
cmtm3	2.39534e-81	0.396551	0.252	0.036	4.14369e-77	Hemogenic endothelium
copz2	5.95329e-81	0.380575	0.229	0.029	1.02986e-76	Hemogenic endothelium
efna1a	1.02249e-80	0.280063	0.201	0.022	1.76881e-76	Hemogenic endothelium
swap70b	1.2361e-80	0.705617	0.416	0.098	2.13833e-76	Hemogenic endothelium
calua	3.20921e-80	0.752263	0.414	0.096	5.55161e-76	Hemogenic endothelium
bcl6b	7.5074e-80	0.565579	0.314	0.055	1.29871e-75	Hemogenic endothelium
tnfrsf19	1.48322e-79	0.309395	0.218	0.027	2.56583e-75	Hemogenic endothelium
arrb2b	1.9746e-79	0.916705	0.541	0.164	3.41585e-75	Hemogenic endothelium
pcdh12	2.89792e-79	0.326249	0.212	0.026	5.01311e-75	Hemogenic endothelium
SH3TC1	1.07115e-78	0.322292	0.21	0.025	1.85299e-74	Hemogenic endothelium
frmd4ba	2.18445e-78	0.398249	0.275	0.044	3.77888e-74	Hemogenic endothelium
her15.1	5.53701e-78	0.43999	0.139	0.01	9.57848e-74	Hemogenic endothelium
sept9a	1.57283e-77	0.403022	0.241	0.034	2.72084e-73	Hemogenic endothelium
kif1b	1.9426e-77	0.324663	0.212	0.026	3.3605e-73	Hemogenic endothelium
efnb2a	3.93655e-77	0.581192	0.278	0.045	6.80983e-73	Hemogenic endothelium
fhl3a	6.22143e-77	0.47373	0.354	0.073	1.07625e-72	Hemogenic endothelium
arhgef7b	6.3e-77	0.496667	0.309	0.056	1.08984e-72	Hemogenic endothelium
lima1a	7.45355e-77	0.406464	0.3	0.052	1.28939e-72	Hemogenic endothelium
fam171a2a	1.92796e-76	0.464336	0.309	0.056	3.33517e-72	Hemogenic endothelium
ddah2	3.27544e-76	0.473864	0.329	0.064	5.66618e-72	Hemogenic endothelium
si:ch211-119e14.1	8.32375e-76	0.339587	0.21	0.026	1.43993e-71	Hemogenic endothelium
cav1	9.19797e-76	0.335901	0.244	0.035	1.59116e-71	Hemogenic endothelium
cpn1.1	2.05516e-75	0.57408	0.241	0.035	3.55521e-71	Hemogenic endothelium
cgnl1	6.69397e-75	0.899639	0.547	0.175	1.15799e-70	Hemogenic endothelium
stard8	1.68114e-74	0.569354	0.38	0.086	2.9082e-70	Hemogenic endothelium
plvapb	2.23356e-74	0.751182	0.348	0.072	3.86384e-70	Hemogenic endothelium
zgc:92818	2.35716e-74	0.512537	0.337	0.069	4.07765e-70	Hemogenic endothelium
scn4bb	2.74114e-74	0.164576	0.108	0.006	4.7419e-70	Hemogenic endothelium
cd99	2.9861e-74	0.350253	0.218	0.029	5.16565e-70	Hemogenic endothelium
mmrn2b	1.06457e-73	0.364387	0.249	0.038	1.84159e-69	Hemogenic endothelium
schip1	2.52992e-73	0.335779	0.252	0.039	4.37651e-69	Hemogenic endothelium
plekhg5a	2.96566e-73	0.332301	0.227	0.031	5.1303e-69	Hemogenic endothelium
zgc:100829	4.07241e-73	0.599931	0.354	0.077	7.04486e-69	Hemogenic endothelium
hoxb6a	5.19584e-73	0.23226	0.164	0.016	8.98829e-69	Hemogenic endothelium
nkd1	8.07393e-73	0.43855	0.278	0.048	1.39671e-68	Hemogenic endothelium
actb2	1.56656e-72	1.26091	1	0.882	2.71e-68	Hemogenic endothelium
dll4	2.30141e-72	0.502107	0.238	0.035	3.9812e-68	Hemogenic endothelium
serpinh1a	5.23098e-72	0.609952	0.329	0.067	9.04907e-68	Hemogenic endothelium
flt1	5.29567e-72	0.302283	0.198	0.024	9.16098e-68	Hemogenic endothelium
prcp	7.149e-72	0.704612	0.371	0.086	1.23671e-67	Hemogenic endothelium
si:ch211-145b13.6	7.80225e-72	0.528043	0.272	0.047	1.34971e-67	Hemogenic endothelium
calcrla	9.76539e-72	0.417707	0.258	0.041	1.68932e-67	Hemogenic endothelium
clic4	1.87497e-71	0.433186	0.28	0.049	3.24351e-67	Hemogenic endothelium
ccdc102a	6.95921e-71	0.219011	0.161	0.016	1.20387e-66	Hemogenic endothelium
svild	7.564e-71	0.491119	0.334	0.07	1.3085e-66	Hemogenic endothelium
dusp6	8.57843e-71	1.00101	0.476	0.143	1.48398e-66	Hemogenic endothelium
klf7b	1.21325e-70	0.726757	0.416	0.108	2.0988e-66	Hemogenic endothelium
oaz2a	1.39603e-70	0.32783	0.176	0.019	2.41499e-66	Hemogenic endothelium
BX284635.1	1.75886e-70	0.200365	0.13	0.01	3.04264e-66	Hemogenic endothelium
cst3	3.09785e-70	0.585574	0.346	0.076	5.35897e-66	Hemogenic endothelium
gng2	3.30328e-70	0.892691	0.484	0.149	5.71435e-66	Hemogenic endothelium
rasgrp3	7.1243e-70	0.261296	0.13	0.01	1.23243e-65	Hemogenic endothelium
smad1	4.94696e-69	0.432714	0.246	0.04	8.55774e-65	Hemogenic endothelium
rrbp1a	5.61416e-69	0.63689	0.388	0.096	9.71193e-65	Hemogenic endothelium
prdm1a	7.67804e-69	0.417058	0.224	0.033	1.32822e-64	Hemogenic endothelium
fstl1b	8.59972e-69	0.700115	0.482	0.142	1.48767e-64	Hemogenic endothelium
mmp14b	9.96723e-69	0.474367	0.371	0.084	1.72423e-64	Hemogenic endothelium
adra1d	2.50519e-68	0.422291	0.232	0.036	4.33373e-64	Hemogenic endothelium
pcdh17	2.66314e-68	0.239972	0.167	0.018	4.60696e-64	Hemogenic endothelium
zgc:174888	4.63507e-68	0.279484	0.195	0.025	8.0182e-64	Hemogenic endothelium
hoxc8a	4.89208e-68	0.15852	0.102	0.006	8.46281e-64	Hemogenic endothelium
sept10	8.22422e-68	0.490194	0.34	0.075	1.42271e-63	Hemogenic endothelium
nckap1	9.84725e-68	0.360723	0.289	0.054	1.70348e-63	Hemogenic endothelium
frmd6	9.99368e-68	0.357874	0.227	0.034	1.72881e-63	Hemogenic endothelium
apoeb	1.64362e-67	1.0865	0.431	0.122	2.8433e-63	Hemogenic endothelium
CU695215.2	2.56659e-67	0.0849849	0.057	0.001	4.43995e-63	Hemogenic endothelium
arhgef12b	3.82503e-67	0.426472	0.275	0.051	6.61691e-63	Hemogenic endothelium
cd9a	1.13959e-66	0.227037	0.125	0.01	1.97138e-62	Hemogenic endothelium
hbegfa	1.31079e-66	0.502887	0.351	0.081	2.26754e-62	Hemogenic endothelium
lnx2b	1.67139e-66	0.247145	0.156	0.016	2.89134e-62	Hemogenic endothelium
cdc42bpb	1.814e-66	0.509022	0.34	0.076	3.13803e-62	Hemogenic endothelium
hapln1b	2.00336e-66	0.869893	0.527	0.177	3.46561e-62	Hemogenic endothelium
camsap2b	3.3632e-66	0.226624	0.184	0.023	5.818e-62	Hemogenic endothelium
lhfpl2b	4.05443e-66	0.284917	0.198	0.027	7.01376e-62	Hemogenic endothelium
hmgb3a	5.57357e-66	0.624457	0.484	0.143	9.64171e-62	Hemogenic endothelium
meis1b	6.01686e-66	0.354458	0.263	0.046	1.04086e-61	Hemogenic endothelium
tmem108	2.62461e-65	0.387136	0.283	0.054	4.5403e-61	Hemogenic endothelium
iqgap2	2.58614e-64	0.675711	0.405	0.111	4.47376e-60	Hemogenic endothelium
fgd5a	3.40926e-64	0.642122	0.433	0.125	5.89768e-60	Hemogenic endothelium
cfl1	4.8699e-64	1.29244	1	0.925	8.42443e-60	Hemogenic endothelium
robo4	5.28627e-64	0.371393	0.3	0.06	9.14472e-60	Hemogenic endothelium
[truncated: 21,217 more rows]
