# Supplementary material for: Dermomyotome-derived endothelial cells migrate to the dorsal aorta to support hematopoietic stem cell emergence
Source: eLife. 2023 Sep 11;12:e58300. doi: 10.7554/eLife.58300 (PMC10495111; doi:10.7554/eLife.58300)
Supplement: Figure 1—source data 2. — Expression of overlapping genes was compared in the same cluster (e.g. SDECs) between 15 ss and 22 hpf and divided into DE genes that are upregulated (Up) on downregulated (Down). Each DE group was then annotated using AmiGO (Consortium, 2019). [file elife-58300-fig1-data2.xlsx]

## Sheet: Narrow
	Comparison between Genes expressed in EC clusters (e.g. SDECs) and Gene annotaion of same anatomical structure (e.g. Somite) based on annotation from AmiGO (Consortium, 2019)
	Expression of overlapping genes was compared in same cluster (e.g. SDECs) between 15 ss and 22 hpf and divided into DE genes that are upregulated (Up) on downregulated (Down)
SDECs Cluster					KVECs Cluster							BVECs I Cluster
Amigo2	SDECs DEG	Overlapping genes	Down	Up	Amigo2	KVECs DEG	Overlapping genes	etv2				Amigo2	BVECs I DEG	Overlapping genes	Down	Up
Somite					Kidney			Down	Up			Brain
aldh1a2	abcb10	aldoaa	axin1	aldoaa	_sept15	aagab	acp1	ap1m2	acp1			ackr3b	abcb10	ackr3b	cxcl12a	aldoaa
aldoaa	abce1	axin1	cdh2	cav1	abrab	aamp	ap1m2	bmp4	atp6v0d1			acvr1l	abce1	alcamb	cxcl12b	cdh2
apc	abcf1	cav1	chd7	churc1	acp1	aars	atp6v0d1	cxxc5a	camk2g1			acvr2aa	abcf1	aldoaa	hirip3	ddx3xb
ascc1	abi3b	cdh2	copa	copb1	aifm3	abca1a	bmp4	dnmbp	cd2ap			acvr2ba	abcf2a	ap1m1	psmb1	efnb2a
axin1	abi3bpb	chd7	efnb2a	copb2	aldh1a2	abca3b	camk2g1	etv5b	cdc42			adcy2b	abracl	atp1a1a.1	rpl36	eif3ha
bbs4	abracl	churc1	gadd45ba	cyp26a1	anks6	abcb5	cd2ap	ezrb	ctnnb1			adcy8	acin1a	auts2a	rps15a	etf1b
bcl2l10	acadvl	copa	gadd45bb	fn1a	anln	abcb7	cdc42	kirrel3l	dis3l2			adcyap1a	acin1b	brd2a	rps19	fn1a
calcrla	acbd3	copb1	her6	igf2a	ap1m2	abcd3a	ctnnb1	notch3	elovl1b			adcyap1b	ackr3b	cdh2		hcfc1a
cap1	acbd7	copb2	naa15a	itgav	apol1	abce1	cxxc5a	prkcsh	epb41l5			adcyap1r1b	acta1b	cxcl12a		hdac1
cav1	acin1a	cyp26a1	neo1a	lamc1	atp6v0d1	abcf1	dis3l2	sec61a1l	epoa			alcamb	actb1	cxcl12b		hmgb1a
ccdc80	acin1b	efnb2a	nono	mob1a	bbs5	abcf2a	dnmbp	sept15_	mdm2			aldh1a2	actb2	cyp26c1		jun
cdh2	aco2	fn1a	rtf1	notch3	bbs9	abhd16a	elovl1b	slc43a1a	med12			aldoaa	actl6a	ddx3xb		marcksb
cdx1a	acp1	gadd45ba	rtn4a	pxna	bmp4	abi1a	epb41l5	snap29	mib1			amigo1	actr1	dicer1		myh10
cdx4	acsbg2	gadd45bb	smarcd1	rap1b	bnc2	abracl	epoa	yap1	myh9a			angpt1	actr2a	dvl2		pbx4
chd7	acsl1a	her6	snu13b	smo	brca2	acadm	etv5b		prkci			anos1a	adam10a	efnb2a		rtn4a
chrd	acsl1b	igf2a	supt6h	thbs3a	cacna1c	acadvl	ezrb		psmd12			ap1m1	adam8a	eif3ha		slbp
chuk	actb1	itgav			camk2g1	acbd3	kirrel3l		srgap2			ap1m2	add3a	etf1b		spry4
churc1	actb2	lamc1			camk2g2	acbd7	mdm2		tfap2a			ap1m3	adh5	etv5b
copa	actl6a	mob1a			casp9	acin1a	med12					apc	adi1	eya1
copb1	actn1	naa15a			ccdc40	acin1b	mib1					apo	adka	fgfr2
copb2	actn4	neo1a			ccnc	aclya	myh9a					arnt2	adssl	fmr1
creb1a	actr1	nono			cd2ap	aco2	notch3					arxa	afdna	fn1a
crim1	actr2a	notch3			cdc42	acp1	prkci					ascl1a	agrn	hcfc1a
ctr9	acvr1ba	pxna			cdh17	acsbg2	prkcsh					ascl1b	ahcy	hdac1
cxcr4a	acvrl1	rap1b			cdh6	acsl1a	psmd12					asphd1	ahnak	her6
cyp26a1	acy3.2	rtf1			cdx1a	acsl1b	sec61a1l					atg4da	aif1l	hirip3
dharma	adam10a	rtn4a			cdx4	acsl3b	sept15_					atl	aimp1	hmgb1a
dlc	adam17a	smarcd1			cep290	acsl4a	slc43a1a					atoh1c	aimp2	jun
dld	adh5	smo			cfap298	acsl4b	snap29					atp13a2	aip	kif22
dmd	adh8b	snu13b			cluap1	acss1	srgap2					atp1a1a.1	ak2	marcksa
dmrt2b	adi1	supt6h			coq8b	actb1	tfap2a					atp1a3a	akap12b	marcksb
dnm2a	adka	thbs3a			crb2b	actb2	yap1					atp1a3b	akap8l	med12
dtwd2	aep1				crkl	actl6a						atxn7	akirin1	mpc1
efna5b	afdna				ctnnb1	actn4						auts2a	akirin2	mycbp2
efnb2a	agrn				ctns	actr1						axin1	akt1s1	myh10
elp3	ahcy				cxadr	actr10						baalca	AL935186.9	myh9b
epha3	ahnak				cxxc5a	actr2a						baalcb	alad	notch3
epha4a	aimp1				cyp26a1	acvr1l						baiap2a	alas2	nrp2b
fbxl18	aip				daam1a	acy3.2						baiap2b	alcama	pbx4
fgf8a	ajuba				dachd	ada2a						baiap2l1a	alcamb	pitx2
fn1a	ak2				dbl	adam10a						baiap2l1b	aldh9a1a.1	pitx3
fn1b	ak3				dcdc2b	adam19a						baiap2l2a	aldoaa	psmb1
foxc1a	AK6				dis3l2	adgrl2a						baiap2l2b	alx4a	psmd12
foxd5	akap12b				dnaaf1	adh5						basp1	alyref	psmd3
foxh1	akap8l				dnaaf11	adi1						bcl11aa	ammecr1	rpl10
fxr1	akirin1				dnm2b	adipor1b						bcl11ab	amotl2a	rpl36
gadd45ba	akt1s1				dnmbp	adipor2						bco1	anapc16	rps15a
gadd45bb	AL935186.9				efhc2	adka						bdnf	angptl4	rps19
gli2a	alad				elovl1b	adrb3a						bean1	ankhd1	rps4x
gno	alas2				emx1	adrm1						beb	ankrd11	rtn4a
greb1	alcama				epb41l5	adsl						bicdl1	ankrd12	sec61a1
has2	alcamb				epoa	adssl1						bid	anp32a	sfpq
her1	aldh6a1				epor	afdna						bmi1a	anp32b	slbp
her12	aldh9a1a.1				etv4	agap1						bmi1b	anp32e	smo
her15.1	aldoaa				etv5a	agr2						bmp2b	antxr1c	sox11a
her4.1	aldob				etv5b	agrn						bmp7a	anxa11b	spry4
her6	alox12				exoc5	agtrap						brd2a	anxa4	tgif1
her7	alyref				ezrb	ahcy						brf1b	ap1m1	tnnt2a
hes6	amd1				farp1	ahcyl1						bri3	ap1s2	vangl2
hjv	ammecr1				fat1a	ahi1						bsk146	ap2a1	wls
igf2a	amotl2a				foxc1a	ahnak						bsx	ap2m1a	yap1
igf2b	anapc16				glcci1a	ahsa1b						btbd9	ap2s1	yy1a
inpp5ka	and2				gli2a	aifm1						ca8	apex1	zic2a
itga5	angptl4				glis2b	aifm2						calm1a	api5
itgav	ankhd1				greb1l	aimp1						capn1a	apln
jam	ankrd11				hdac4	aimp2						cars2	apoc1
kcnh1a	ankrd12				hdac5	aip						ccsapb	apoeb
kcnh1b	anp32a				hdgfl3	ak1						cdc42se1	appa
kif22	anp32b				hnf1ba	ak2						cdh2	aqp1a.1
lama1	anp32e				hnf1bb	ak3						cdipt	arf1
lamb1a	anxa11a				ift172	AK6						celsr2	arf2a
lamb2	anxa11b				ift27	akap12b						cep290	arf5
lamc1	anxa1a				ift46	akap17a						cep55l	arf6a
larp6a	anxa1c				ift74	akap8l						cetn4	arhgap5
ldb3a	anxa2a				ift81	akap9						chd8	arhgdia
lef1	anxa4				ift88	akirin1						chic1	arid1aa
map2k7	anxa5b				igf2b	akr1b1						chic2	arid1ab
mapk14a	ap1ar				inf2	akr7a3						chmp1a	arid3b
mef2aa	ap1b1				inpp5b	akt1s1						ckba	arid4a
meox1	ap1m1				inpp5e	akt2l						ckbb	arl14ep
mespaa	ap1s1				invs	aktip						clp1	arl4aa
mespab	ap2a1				iqcb1	AL935174.5						clpb	arl6ip1
mespba	ap2b1				iqgap2	AL935186.9						cnnm2a	arpc1a
mespbb	ap2m1a				irx2a	alad						cnnm2b	arpc2
mib1	ap2s1				irx3b	alas1						cnpy1	arpc3
mob1a	apex1				jag2b	alcamb						cops6	arpc4
mxtx1	api5				kank2	aldh1l1						coro1a	arpc4l
myhz1.1	apip				kcnj10a	aldh2.2						crabp2a	arpc5a
naa15a	aplnra				kcnq1.1	aldh3b1						crabp2b	arpp19b
naa15b	aplp2				kif14	aldh6a1						crb2a	arvcfb
naa35	apoc1				kif3b	aldh7a1						creb1a	asf1ba
naa50	apoeb				kirrel1b	aldh9a1a.1						crppa	ash1l
neo1a	appa				kirrel3l	aldoaa						csf1ra	asph
nono	aqp1a.1				kmo	aldob						csrnp1b	aspm
not	aqp3a				lmx1ba	alyref						ctnna2	atad2
notch1a	araf				lmx1bb	amd1						cud	atad5a
notch3	arcn1a				mafba	amdhd2						cxcl12a	atf3
noto	arcn1b				magi2a	ammecr1						cxcl12b	atf4a
pcdh10b	arf1				mdm2	amotl2a						cxcr4b	atf4b
pdlim7	arf2a				mecom	anapc11						cyp26a1	atf6
prrc1	arf5				med12	anapc13						cyp26b1	atf7ip
psd2	arf6a				mib1	anapc16						cyp26c1	atox1
psen1	arf6b				mpped2	angel2						daam1a	atp1a1a.1
psen2	arhgap35a				myh9a	angptl4						dand5	atp1b1a
ptpn21	arhgap5				myo1ca	ank2b						dbx1a	atp2a2b
ptprub	arhgdia				myo1cb	ankhd1						dbx1b	atp2b1a
pxna	arhgdig				myo1ea	ankrd11						dbx2	atp2b2.1
pxnb	arhgef12b				myo1eb	ankrd12						dcc	atp5f1b
rap1b	arhgef1b				nek8	ankrd22						ddc	atp5f1c
rbm24a	arhgef25b				nog3	ankrd54						ddx3xb	atp5f1d
rbm24b	arid1aa				nostrin	anp32a						ddx46	atp5f1e
rbpja	arid3b				notch3	anp32b						dharma	atp5fa1
rbpjb	arid4a				noto	anp32e						dhd	atp5if1a
rgs3a	arl1				nphp1	anxa11a						dicer1	atp5if1b
ripply1	arl4aa				nphp3	anxa11b						disc1	atp5l
rtf1	arl6ip1				nphp4	anxa13						disp1	atp5mc1
rtn4a	arl6ip5b				nphs1	anxa4						dixdc1a	atp5mc3a
scube2	arpc1a				nphs2	anxa5b						dkk1b	atp5mc3b
shha	arpc2				osr1	aox5						dla	atp5meb
slc7a6os	arpc3				osr2	ap1ar						dlb	atp5mf
smarcd1	arpc4				p4htmb	ap1b1						dmbx1a	atp5pb
smo	arpc4l				pard6gb	ap1m1						dmbx1b	atp5pd
snu13b	arpc5a				pax2a	ap1m2						dmrta2	atp5pf
sulf1	arpc5b				pax8	ap1s1						doc2a	atp5po
supt6h	arpp19a				pde1a	ap1s2						dpysl2b	atp6v0ca
tbx16	arpp19b				pde6d	ap1s3b						dvl2	atp6v1g1
tbx16l	arrb2b				pkd1a	ap2a1						dyrk1aa	atrx
tbx6	asap2b				pkd1b	ap2b1						dzip1	atxn2l
tbxta	ash1l				pkd1l2a	ap2m1a						efnb2a	aurkaip1
tdgf1	asph				pkd1l2b	ap2s1						efnb3b	aurkb
tgfb2	atf3				pkd2	ap3b1a						egl	auts2a
tgfbr3	atf4a				pkd2l1	ap3d1						egr2b	axin2
thbs3a	atf4b				pkhd1l1.1	ap3m1						eif3ha	b4galt6
tle3a	atf6				plce1	ap3m2						eif3hb	bahcc1b
tnpo1	atf7ip				podxl	ap3s2						emx2	bambia
trip4	atox1				ponzr1	ap4s1						emx3	banf1
wnt3a	atp1a1a.1				ppargc1a	apba1b						en2a	baz1b
wnt5b	atp1b1a				prkceb	apc						en2b	baz2a
wnt8a	atp1b3a				prkci	apex1						end	baz2ba
zeb2a	atp2a2b				prkcsh	aph1b						ent	bcas2
zeb2b	atp2b1a				prkcz	api5						epb41l5	bccip
	atp2b2.1				psmd12	apip						epha4a	bcl7a
	atp5f1b				ptger2a	appa						esa	blcap
	atp5f1c				ptger4a	appb						etf1b	blf
	atp5f1d				ptgs1	araf						etv5b	blvrb
	atp5f1e				ptgs2a	arcn1a						exoc7	bmp4
	atp5fa1				rbpja	arcn1b						exosc3	bmp5
	atp5if1a				rbpjb	arf1						exosc5	bms1
	atp5if1b				ret	arf2a						exosc8	BNC1
	atp5l				rp2	arf4a.1						eya1	boc
	atp5mc1				sec61a1l	arf5						faa	bptf
	atp5mc3a				shha	arf6a						fabp7a	brd1b
	atp5mc3b				shroom3	arf6b						fabp7b	brd2a
	atp5md				shy	arfgap2						fezf2	brd3a
	atp5meb				sim1a	arfgap3						fgf16	brd3b
	atp5mf				six2a	arfgef1						fgf19	brd4
	atp5pb				slc12a3	arfip1						fgf22	brk1
	atp5pd				slc41a1	arglu1a						fgf3	bsg
	atp5pf				slc43a1a	arhgap35a						fgf8a	btbd10b
	atp5po				snap29	arhgdia						fgfr2	btf3
	atp6v0ca				sos2	arhgef18a						fgfrl1a	btf3l4
	atp6v1ba				srgap2	arhgef1a						flb	btg1
	atp6v1g1				stx16	arid1aa						fll	btg2
	atrx				tbx16	arid1ab						fmr1	bub3
	axin1				tbx2a	arid2						fn1a	bud31
	b3gnt2b				tbx2b	arid3b						foxa3	BX927308.1
	b4galt6				tbxta	arid4a						foxb1a	bxdc2
	bahcc1b				tdgf1	arih2						foxb1b	bysl
	bambia				tfap2a	arl1						foxh1	bzw1a
	banf1				thsd7aa	arl14ep						foxl1	bzw1b
	baxa.1				tmem234	arl4aa						fsta	c1qbp
	baz1b				tmem63c	arl4cb						ful	CABZ01005379.1
	baz2a				tnnt2a	arl6ip1						fzd3a	CABZ01058261.1
	baz2ba				traf3ip1	arl6ip5a						fzd8a	CABZ01080702.1
	bcam				trim32	arl8a						gabarapa	cacybp
	bcar1				tsc1a	arpc1a						gali	cad
	bcas2				ttc26	arpc2						gas2l3	cahz
	bcat2				tyro3	arpc3						gbx1	cald1a
	bccip				unm_tf206	arpc4						gbx2	calm2a
	bckdhb				unm_tz214a	arpc4l						gdpd3a	calm2b
	bcl2l13				upk3b	arpc5a						glc	calm3a
	bcl7a				usp40	arpp19b						gli1	calm3b
	bhlhe40				vcana	arrb2b						gli2a	calr
	bin2b				vegfaa	arrdc3b						gli2b	calr3a
	blcap				vhl	asb12a						gmds	calr3b
	blf				wnt5a	ascc1						gnrh2	calua
	blvrb				wnt8a	asf1bb						gnrh3	cand1
	bmp4				wt1a	ash1l						golga2	canx
	BNC1				wt1b	asna1						greb1	capns1b
	bnip4				wwtr1	asph						grhl2b	caprin1b
	boc				yap1	aspm						grhl3	capza1a
	bptf					atf3						gsc	capza1b
	brd2a					atf4a						guw	carm1
	brd3a					atf4b						has2	cast
	brd3b					atf6						hcfc1a	cbx1a
	brd4					atf7ip						hdac1	cbx3a
	brk1					atg13						hdc	cbx5
	bsdc1					atg5						her11	ccdc25
	bsg					atic						her12	ccdc47
	btbd10b					atl3						her15.1	ccna2
	btf3					atox1						her5	ccnb1
	btf3l4					atp11a						her6	ccnd1
	btg1					ATP11B						hesx1	ccng1
	btg2					atp13a1						hgfa	ccng2
	btg3					atp13a2						hgfb	ccni
	bud31					atp1a1a.1						hirip3	ccnl1a
	BX927308.1					atp1a1a.2						hmgb1a	ccnl1b
	BX936337.1					atp1a3a						hnf1ba	ccnt2b
	bysl					atp1b1a						hoxb1a	cct2.1
	bzw1a					atp1b1b						hoxb1b	cct3
	bzw1b					atp1b3b						hoxb5a	cct4
	c1d					atp2a2b						hoxb5b	cct5
	c1qbp					atp2a3						htt	cct6a
	ca6					atp2b1a						hub	cct7
	CABZ01058650.1					atp2b2.1						igf2b	cct8
	CABZ01080702.1					atp5f1b						igsf10	cd151l
	CABZ01085139.1					atp5f1c						ino80e	cd2bp2
	CABZ01086029.1					atp5f1d						irx1b	cd3eap
	CABZ01087560.1					atp5f1e						irx7	cd63
	CABZ01088274.1					atp5fa1						itr	cd81a
	cacybp					atp5if1a						jun	cd99l2
	cad					atp5if1b						kas	cdc20
	cahz					atp5l						katnb1	cdc42
	cald1a					atp5mc1						kcnb1	cdc42bpb
	calm2a					atp5mc3a						kcng4b	cdc42ep5
	calm2b					atp5mc3b						kcnh1a	cdc42l
	calm3a					atp5md						kcnh1b	cdca7a
	calm3b					atp5mea						kctd12.1	cdca7b
	calr					atp5meb						kctd12.2	cdh11
	calr3a					atp5mf						kctd13	cdh2
	calr3b					atp5pb						kctd15a	cdh5
	calua					atp5pd						kctd15b	cdk1
	calub					atp5pf						kdm6a	cdk9
	camk2d1					atp5po						kdm6al	cdkn1bb
	camk2g1					atp6ap1b						kdm7aa	cdkn2aipnl
	cand1					atp6ap2						kdm7ab	cdon
	canx					atp6v0a1a						kep	cdv3
	capgb					atp6v0b						kif14	cenpe
	capn1a					atp6v0ca						kif22	cenpf
	capn2a					atp6v0cb						kirrel3l	cfd
	capn2b					atp6v0d1						klf8	cfl1
	capn8					atp6v1aa						kmt2d	cgnl1
	capn9					atp6v1ab						kuk	chac1
	capns1a					atp6v1ba						lama1	chaf1a
	capns1b					atp6v1c1a						lamb1a	chd2
	caprin1a					atp6v1c1b						lamc1	chd4a
	caprin1b					atp6v1d						lef1	chd4b
	capza1a					atp6v1e1b						lft1	chd7
	capza1b					atp6v1f						lgi1a	cherp
	carhsp1					atp6v1g1						lgi1b	chmp5b
	carm1					atp6v1h						lgr4	chrac1
	cast					atpaf1						lhx2b	chtopa
	cav1					atpv0e2						lhx5	cirbpa
	cav2					atrx						lhx9	cirbpb
	cavin2a					atxn2l						lmo4a	cks1b
	cavin2b					aup1						lmx1ba	clgn
	cbr1l					aurkaip1						lmx1bb	clic4
	cbsb					axin2						lnf	clint1a
	cbx1a					azin1b						lot	clta
	cbx3a					b3gnt2b						mafba	cltca
	cbx5					b3gnt5a						maj	cmlc1
	ccdc124					b3gnt5b						map2k5	cnbpa
	ccdc25					bach1b						mapk3	cnbpb
	ccdc47					bag6						marcksa	cnmd
	ccnd1					bahcc1b						marcksb	cnn2
	ccng1					bambia						maza	cnn3a
	ccni					banf1						mdga2a	cnot1
	ccnl1a					baxa.1						mdkb	cnot6a
	ccnt1					baz1a.1						med12	cnp
	ccnt2b					baz1b						med14	col11a1a
	cct2.1					baz2a						meis1a	col11a1b
	cct3					baz2ba						met	col12a1a
	cct4					bcam						mfsd2aa	col1a1a
	cct5					bcap31						mgaa	col1a1b
	cct6a					bcas2						mib1	col1a2
	cct7					bcat2						mpc1	col2a1b
	cct8					bccip						mpc2a	col4a5
	cd151l					bckdha						mpc2b	col4a6
	cd164					bckdhb						msi2b	col5a1
	cd2ap					bckdk						mvp	colec12
	cd2bp2					bcl11ba						mycbp2	copb2
	cd63					bcl2l10						myh10	cope
	cd81a					bcor						myh9b	cops2
	cd99					bet1l						ncor1	copz1
	cd99l2					bhlhe40						ndr1	coro1ca
	cd9b					bik						ndr2	coro1cb
	cdc42					birc2						neflb	cotl1
	cdc42bpb					birc6						nel	cox4i1
	cdc42ep5					blcap						nes	cox5aa
	cdc42l					blmh						neurod4	cox5ab
	cdca7a					bloc1s1						neurog1	COX5B
	cdca7b					bloc1s2						nin	cox6a1
	cdh1					bloc1s3						nkx2.1	cox6b2
	cdh2					bloc1s4						nkx2.4a	cox6c
	cdh5					bloc1s5						nkx2.4b	cox7a2a
	cdk1					bloc1s6						nlk2	cox7a2l
	cdkn1bb					blvrb						notch1a	cox7b
	cdo1					bmp4						notch1b	cox7c
	cdon					bms1						notch3	cox8a
	cdv3					bnip3lb						noto	cpne1
	cebpb					bnip4						npas4a	cpox
	cebpd					bod1						npr1b	cpsf2
	cebpg					bola1						nr2e3	cpsf6
	cenpf					BOLA2						nr4a2a	CR318588.4
	cep350					borcs7						nr4a2b	CR383676.1
	cers2b					bptf						nr5a1a	CR936321.1
	cfd					brd1b						nrg1	crebbpa
	cfl1					brd2a						nrp1a	crebbpb
	cfl1l					brd3a						nrp2b	crebzf
	cfp					brd3b						nsfa	crip2
	chac1					brd4						ntn1a	crk
	chaf1a					brk1						ntn1b	crtap
	chchd10					bsdc1						ocrl	csde1
	chchd2					bsg						ogg1	csnk1a1
	chd2					btbd10b						olig2	csnk1g2a
	chd4a					btf3						otpa	csnk1g2b
	chd4b					btf3l4						otpb	csnk2a1
	chd7					btg1						otud4	csnk2b
	chd9					btg2						otx2a	csrp1a
	chl1a					btg3						otx2b	cst14a.2
	chmp1b					bud31						oxtr	cstf2
	chmp2a					BX000438.2						paf	CT027638.1
	chmp2bb					BX322603.1						pafah1b1a	CT030188.1
	chmp4bb					BX323590.2						pafah1b1b	ctbp1
	chmp5b					BX465227.1						pagr1	ctcf
	chrac1					BX469930.1						pals1a	ctdsp2
	chtopa					BX548028.1						pard3ab	ctgfa
	churc1					BX571715.1						pax2a	cthrc1a
	ciao1					BX572619.1						pax6a	ctnna1
	cib1					BX927308.1						pax6b	ctnnb1
	cica					BX936337.1						pbx2	ctnnb2
	cirbpa					bxdc2						pbx4	ctnnd1
	cirbpb					bysl						pcare1	ctr9
	cited4b					bzw1a						pcdh10b	ctsd
	ckap4					bzw1b						pcdh19	ctsk
	ckba					c1d						pcsk7	ctsla
	cks1b					c1galt1c1						peli1b	CU467861.1
	CKS2					c1qbp						phf8	CU694197.1
	cldn1					caap1						phox2a	cul3a
	cldn7b					CABZ01005379.1						pitx2	cx43
	cldnb					CABZ01021592.1						pitx3	cx43.4
	cldne					CABZ01032488.1						pknox1.1	cxcl12a
	cldnh					CABZ01048402.2						pomgnt2	cxcl12b
	cldni					CABZ01058650.1						pou3f1	cxcl18b
	clint1a					CABZ01071848.1						pou3f2a	cyc1
	clpp					CABZ01080568.1						pou3f2b	cycsb
	clstn1					CABZ01080702.1						pou3f3a	cyfip1
	clta					CABZ01087560.1						pou3f3b	cygb1
	cltca					CABZ01113812.1						pou4f2	cyp26c1
	cltcb					cacybp						pou4f3	cyr61
	cmpk					cadps2						pou5f3	cyyr1
	cnbpa					cahz						ppm1kb	dad1
	cnbpb					calm1b						ppp1r12a	dap
	cnih1					calm2a						ppp4ca	dbi
	cnn2					calm2b						prickle1a	dcaf7
	cnn3a					calm3a						prickle1b	dcn
	cnot1					calm3a.1						prkci	dctn3
	cnp					calm3b						prmt8b	ddost
	coa3a					calr						prnprs3	DDX17
	col11a1a					calr3a						prop1	ddx18
	col12a1a					calr3b						prox1a	ddx21
	col12a1b					calub						psen1	ddx23
	col14a1a					camk1b						psen2	ddx27
	col16a1					camk2d1						psmb1	ddx39aa
	col18a1a					camk2g1						psmd12	ddx39ab
	col1a1a					cand1						psmd3	ddx3xa
	col1a1b					cant1a						ptk2ab	ddx3xb
	col1a2					canx						ptpro	ddx5
	col28a2a					capn2b						ptprsa	ddx6
	col2a1b					capn8						ptw	ddx61
	col4a3					capn9						pycr1b	degs1
	col4a4					capns1a						pygb	dek
	col4a5					capns1b						qdprb.1	denr
	col4a6					caprin1b						rac3b	dhfr
	col5a1					capza1a						ralgapa1	dhx15
	col5a2a					capza1b						rarab	dicer1
	col5a3a					carhsp1						rars2	dido1
	col5a3b					carm1						rbfox1	dkc1
	col7a1					cars						rbm7	dlst
	col7a1l					casc4						rel	dnaja2a
	COLGALT1 (1 of many)					cax1						reln	dnajc1
	copa					cbfb						rest	dnajc7
	copb1					cbsb						rfng	dnajc8
	copb2					cbx1a						rnf152	dnajc9
	cope					cbx3a						rnf216	dnase1l4.1
	copg2					cbx5						roraa	dnmt1
	cops2					ccdc115						rp1l1a	dnmt3ba
	cops4					ccdc12						rpl10	dpf2l
	copz1					ccdc124						rpl36	dpy30
	copz2					ccdc126						rps15a	drap1
	coro1ca					ccdc167						rps19	drg2
	cotl1					ccdc186						rps4x	dusp5
	cox17					ccdc187						rtn4a	dusp6
	cox4i1					ccdc22						rtn4b	dut
	cox5aa					ccdc25						rx3	dvl2
	cox5ab					ccdc47						sat	dynll1
	COX5B					ccdc58						sbd	dynlrb1
	cox6a1					ccdc9						sbno2a	ebf3a
	cox6b2					ccdc93						scgn	ebf3a.1
	cox6c					ccnd1						scinla	ebna1bp2
	cox7a2a					ccng1						sec61a1	edf1
	cox7a2l					ccng2						sema3d	eef1a1l1
	cox7b					ccni						sema4d	eef1b2
	cox7c					ccnl1a						sez6l2	eef1da
	cox8a					ccnl1b						sfpq	eef1db
	cpamd8					ccnt1						sfrp5	eef1g
	cpne1					ccnt2b						shank3a	eef2b
	cpox					cct2.1						shha	efnb2a
	cpsf2					cct3						shhb	egr1
	cpsf6					cct4						si:ch1073-140o9.2	eif1axa
	CR318588.4					cct5						si:ch73-119p20.1	eif1axb
	CR381618.1					cct6a						sim1a	eif1b
	CR383676.1					cct7						six1b	eif2s1a
	crabp2a					cct8						six3a	eif2s1b
	creb3l2					cd151						six3b	eif2s2
	crebbpa					cd164						six6a	eif2s3
	crebbpb					cd2ap						six6b	eif3ba
	crebzf					cd2bp2						slbp	eif3c
	crk					cd3eap						slc16a2	eif3d
	crtap					cd63						slc2a2	eif3ea
	crybg1a					cd7al						slc2a3a	eif3f
	crybg1b					cd81a						slc7a6os	eif3g
	cs					cd82a						slc9a3r1a	eif3ha
	csde1					cd82b						smo	eif3i
	csnk1a1					cd99l2						snx14	eif3ja
	csnk1da					cd9b						solr	eif3k
	csnk1g2a					cdc26						sox11a	eif3m
	csnk1g2b					cdc27						sox11b	eif3s10
	csnk2a1					cdc34b						sox14	eif3s6ip
	csnk2b					cdc42						sox2	eif4a1a
	csrp1a					cdc42bpb						sp5l	eif4a1b
	cst14a.2					cdc42ep5						spaw	eif4a3
	cst3					cdc42l						spm	eif4bb
	cstf2					cdca4						spry4	eif4e1c
	CT027638.1					cdca5						spw	eif4ebp1
	CT030188.1					cdh1						spz	eif4ebp2
	ctbp1					cdh2						srrm4	eif4ebp3l
	ctcf					cdk1						stx1a	eif4g1a
	ctdsp2					cdk11b						syngap1b	eif4g2a
	ctgfa					cdk2ap2						taf1	eif4g2b
	ctnna1					cdk5rap3						tal2	eif4h
	ctnnb1					cdk8						taok2a	eif5
	ctnnb2					cdk9						taok2b	eif5a
	ctnnd1					cdkal1						tbata	eif5a2
	ctsf					cdkn1ba						tbc1d23	eif5b
	ctsla					cdkn1bb						tbcd	eif6
	CU467861.1					cdkn1ca						tbr1a	elavl1a
	CU694197.1					cdkn2aipnl						tbr1b	ell2
	CU984600.1					cdkn3						tbx2b	elmsan1b
	cul3a					cdo1						tbxta	elob.1
	cx43.4					CDPF1						tcf4	elocb
	cx44.2					cdv3						tcf7l1a	elof1
	cxcl12a					cebpb						tcf7l1b	emc10
	cxcl12b					cebpd						tcf7l2	emc2
	cxcl14					celf1						tdgf1	emc6
	cxxc5a					celf2						tfap2a	emilin1a
	cyb5a					celf3a						tgif1	emp2
	cyb5r3					celsr1a						thnsl2	eny2
	cyc1					cenpe						thraa	ep300a
	cycsb					cenpf						tlcd3ba	ep300b
	cyfip1					cep170aa						tnfrsf19	epb41b
	cyp1a					cep350						tnfrsf21	eprs
	cyp1b1					cers2b						tnnt2a	erh
	cyp26a1					cers3a						toe1	esf1
	cyp2aa6					cfl1						trim69	etf1b
	cyr61					cfl1l						tsc22d3	etv2
	cyt1					chac1						tsen54	etv5b
	cyt1l					chaf1a						tun	ewsr1a
	cyth1a.1					chchd1						twn	ewsr1b
	cyyr1					chchd10						uhi	eya1
	dab2ipb					chchd2						ulk2	ezh2
	dad1					chchd4a						unm_m383	f13a1b
	dag1					chchd6b						unm_m488	f3b
	dap					chd1						unm_m513	fabp11a
	dap1b					chd2						unm_m514	fabp3
	dazap2					chd4a						unm_m569	fam133b
	dbi					chd4b						unm_m590	fam168a
	dcn					chd7						unm_m613	fam210b
	dctn3					chic2						unm_m685	fam32a
	dda1					chl1a						usp39	fam53b
	ddah2					chmp1b						vangl2	fam76b
	ddi2					chmp2a						vax1	fat1a
	ddost					chmp2bb						veph1	faua
	ddt					chmp4bb						vik	fbl
	DDX17					chmp5b						viper	fbxo5
	ddx21					chmp6b						voy	fcf1
	ddx23					chordc1b						vsx1	fen1
	ddx27					chrac1						vwc2	fgfr2
	ddx39aa					chrna1						wdr73	fgfr4
	ddx39ab					chtopa						wif1	fhl2a
	ddx3xa					churc1						win	fibina
	ddx3xb					ciao1						wls	fip1l1b
	ddx5					ciao2a						wnt1	fkbp14
	ddx6					ciapin1						wnt10b	fkbp1aa
	ddx61					ciarta						wnt3	fkbp2
	degs1					cib1						wnt3a	fkbp3
	dek					cirbpa						wnt4	fkbp7
	dennd2da					cirbpb						wnt5b	fkbp9
	denr					cited1						wnt8a	fli1a
	derl1					cited4b						wnt8b	flna
	dhx15					ckap4						xpo1a	flot1b
	dhx38					ckbb						yaf2	flot2a
	dicer1					clasrp						yap1	flrt3
	dido1					clcn3						ypel3	fmoda
	dkc1					clcn7						yur	fmr1
	dldh					cldn12						ywhag1	fn1a
	dlst					cldn7b						yy1a	fosab
	dlx3b					cldnb						zdhhc15b	fosl1a
	dlx5a					cldne						zdhhc16a	foxc1a
	dnaja2a					cldnf						zez	foxc1b
	dnajb11					cldnh						zgc:158689	foxd1
	dnajc1					clint1a						zic1	foxd2
	dnajc7					clpp						zic2a	foxp1a
	dnajc8					clptm1l						zic2b	foxp4
	dnase1l4.1					clta						zic4	fscn1a
	dnmt3ba					cltca						zic5	fstl1a
	dnmt3bb.1					cltcb						znf143a	fstl1b
	dohh					cluha						znf143b	fth1a
	dpm1					cmpk						znf503	fthl27
	dpm2					cmtm3						znf703	fubp1
	dpp3					cmtm6						znfl1	fxyd6l
	dpy30					cmtm7						znfl1b	fzd2
	drap1					cnbpa						znfl1c	fzd7a
	drg1					cnbpb						znfl1g	g3bp1
	drg2					cnep1r1						znfl1h	gabarapb
	dsc2l					cnih1						znfl1i	gabpa
	DSG2					cnn2						znfl1j	gadd45ba
	dspa					cnn3a						znfl1k	gar1
	dusp1					cnot1						znfl1l	gars
	dusp5					cnot9						znhit3	gatad2ab
	dusp6					cnp						zon	GCA
	dut					cnpy1						zranb1a	gdi2
	dvl2					COA4						zranb1b	ggcx
	dynll1					coa5							gigyf1b
	dynlrb1					coa6							glo1
	dynlt3					col11a1a							glrx
	ebna1bp2					col18a1a							glrx3
	ecrg4b					col1a1a							glrx5
	edf1					commd2							glula
	eef1a1l1					commd3							glulb
	eef1b2					commd5							gmfb
	eef1da					commd7							gmps
	eef1db					commd9							gnai2a
	eef1g					copa							gnaia
	eef2b					copb1							gnb1a
	efhd2					copb2							gnb1b
	efnb2a					cope							gng5
	egfl6					copg2							gnl2
	egr1					cops2							gnl3
	eif1axa					cops4							golga7
	eif1axb					cops5							golgb1
	eif1b					cops7a							golt1bb
	eif2a					cops8							gpatch8
	eif2b1					cops9							gpc4
	eif2s1a					copz1							gpx4b
	eif2s1b					copz2							gpx8
	eif2s2					coq10b							grcc10
	eif2s3					coro1ca							gse1
	eif3ba					cotl1							gspt1l
	eif3c					cox10							gtf2e2
	eif3d					cox17							gtf2f1
	eif3ea					cox4i1							gtf2f2a
	eif3f					cox5aa							gtpbp4
	eif3g					cox5ab							h1f0
	eif3ha					COX5B							h2afva
	eif3i					cox6a1							h2afvb
	eif3ja					cox6b2							h2afx
	eif3jb					cox6c							h2afx1
	eif3k					cox7a2a							h2afy2
	eif3m					cox7a2l							h3f3b.1
	eif3s10					cox7b							h3f3b.1.1
	eif3s6ip					cox7c							h3f3b.1.2
	eif4a1a					cox8a							h3f3c
	eif4a1b					cpda							h3f3d
	eif4a3					cpe							hapln1a
	eif4bb					cpeb4b							hars
	eif4e1c					cpne1							hbae1.1
	eif4ebp1					cpox							hbae1.1.1
	eif4ebp2					cpsf2							hbae1.3
	eif4ebp3l					cpsf3							hbae3
	eif4g1a					cpsf6							hbae5
	eif4g2a					cpvl							hbbe1.1
	eif4g2b					CR318588.2							hbbe1.2
	eif4h					CR318588.4							hbbe1.3
	eif5					CR383676.1							hbbe2
	eif5a					CR855311.1							hbbe3
	eif5a2					CR936321.1							hbegfa
	eif5b					crabp2b							hcfc1a
	eif6					cracr2b							hcfc1b
	elavl1a					creb1a							hdac1
	elf1					creb3l3l							hdgfl2
	elmsan1b					crebbpa							hdlbpa
	elob.1					crebbpb							hectd1
	elocb					crebzf							hells
	elof1					creld2							hemgn
	emc10					crip1							her6
	emc2					crk							hhip
	emc6					crnkl1							hif1ab
	emc7					cry1ba							hif1al
	emd					crybg1b							higd1a
	emilin2b					cs							hikeshi
	emp2					csde1							hint1
	eno3					csnk1a1							hirip3
	eny2					csnk1da							hist1h4l
	ep300a					csnk1db							hist2h2l
	epas1a					csnk1e							histh1l
	epb41b					csnk1g1							hm13
	epcam					csnk1g2a							hmbsa
	eppk1					csnk1g2b							hmbsb
	eprs					csnk2a1							hmga1a
	erf					csnk2b							hmga2
	erh					cspg5a							hmgb1a
	erp44					csrp1a							hmgb1b
	esd					cst14a.2							hmgb2a
	esrp1					cstf2							hmgb2b
	esrp2					CT027638.1							hmgb3a
	etf1b					CT573383.1							hmgb3b
	etfa					CT583646.2							hmgn2
	etfb					ctbp1							hmgn3
	ets2					ctcf							hmgn6
	ewsr1a					ctdsp2							hmgn7
	ewsr1b					ctnna1							hnrnpa0a
	eya1					ctnnb1							hnrnpa0b
	ezrb					ctnnb2							hnrnpa0l.1
	f11r.1					ctnnbip1							hnrnpa1b
	f3b					ctnnd1							hnrnpaba
	fabp3					ctr9							hnrnpabb
	fabp7a					ctsa							hnrnpc
	faf2					ctsba							hnrnpd
	fam107b					ctsc							hnrnph1l
	fam129ba					ctsd							hnrnpk
	fam133b					ctsf							hnrnpl
	fam168a					ctsla							hnrnpl2
	fam210b					ctslb							hnrnpm
	fam32a					ctslb.1							hnrnpua
	fam49ba					ctsz							hnrnpub
	fam53b					CU467822.1							hnrnpul1
	fam76b					CU467861.1							hnrpkl
	FAM83G					CU469577.1							hoxb3a
	farp2					CU633745.1							hp1bp3
	fat1a					CU694197.1							hsbp1b
	fat2					CU695215.2							hsp90aa1.2
	faua					CU929259.1							hsp90ab1
	fbl					CU984600.1							hsp90b1
	fbxo11a					cul1a							hspa4a
	fcho2					cul3a							hspa4b
	fdps					cx30.3							hspa5
	fen1					cx43.4							hspa8
	fermt1					cxcr4b							hspa9
	fgf24					cxxc1a							hspb1
	fgfr1a					cxxc5a							hspd1
	fgfr2					cxxc5b							hspe1
	fkbp10b					cyb5a							huwe1
	fkbp14					cyb5r1							hypk
	fkbp1aa					cyb5r3							id1
	fkbp2					cyc1							id3
	fkbp3					cycsb							idh2
	fkbp4					cyfip1							ier2a
	fkbp7					cyp1a							ier2b
	fkbp9					cyp20a1							ier3ip1
	flii					cyp3c1							ier5
	flna					cyt1							ier5l
	flot1b					cyt1l							ifi30
	flot2a					cyth1b							igf2bp1
	fmo5					dad1							igf2bp3
	fn1a					dag1							ik
	fosab					dap							ilf2
	fosb					dap1b							ilf3b
	fosl1a					dap3							inka1a
	fosl2					dazap2							ipo7
	foxj3					dbi							irf2bp2b
	FOXK2					dcaf7							ISCU (1 of many)
	foxp4					dclk2a							isg20
	fras1					dct							itga5
	frem2a					dctn2							itm2ba
	frem3					dctn3							ivns1abpb
	fryl					dctn4							jam3b
	fstl1a					dctn5							jcada
	fstl1b					dcun1d1							jdp2b
	fth1a					dcun1d5							jmjd1cb
	fthl27					dda1							jpt1b
	fthl31					ddah2							jpt2
	fubp1					ddi2							jun
	fuca1.1					ddit3							junba
	fundc1					ddost							junbb
	fxr2					ddt							jupa
	fxyd1					DDX17							kank2
	fxyd6l					ddx18							kansl1b
	fzd7a					ddx19							kars
	g2e3					ddx21							kctd5a
	g3bp1					ddx23							kdelr2a
	gabarapa					ddx24							kdelr2b
	gabarapb					ddx27							kdm1a
	gadd45ba					ddx39aa							kdm2ba
	gadd45bb					ddx39ab							kdm5c
	galnt7					ddx3xa							kdm6ba
	gapdhs					ddx3xb							kdm6bb
	gar1					ddx42							khdrbs1a
	gars					ddx46							khdrbs1b
	gas1a					ddx5							khsrp
	gatad2ab					ddx6							kif11
	GCA					ddx61							kif22
	gcsha					dedd1							kirrel1a
	gdi2					degs1							klf6a
	gdpd2					degs2							kmt2bb
	ggcx					dek							kmt2cb
	gigyf1b					denr							kmt5aa
	glo1					derl1							kpna2
	glrx					derl2							kpna3
	glrx3					derl3							kpnb1
	glrx5					desi2							kpnb3
	glud1b					dgcr2							krt18a.1
	glulb					DHDH							krt18b
	gmfb					dhrs12							krt8
	gmnn					dhx15							krtcap2
	gmppb					dhx38							larp1b
	gmps					dhx9							larp4ab
	gnai2a					dicer1							lasp1
	gnaia					dido1							lbr
	gnb1a					dis3l2							ldb1a
	gnb1b					dkc1							ldhba
	gng5					dlat							leo1
	gnl2					dlb							lgals3a
	gnl3					dldh							lhfpl2a
	golga7					dlgap5							lig1
	golgb1					dlst							lims1
	golt1bb					dlx4b							lin28a
	gorasp2					dlx6a							llph
	gpa33a					dnaja2a							lman2
	gpatch8					dnaja2b							lmf2b
	gpc4					dnajb11							lmnb1
	gpd1c					dnajb12a							lmnb2
	gpx1a					dnajc1							lmo2
	gpx4b					dnajc10							loxl2b
	gpx8					dnajc11a							lpl
	grb2b					dnajc19							lrig2
	grcc10					dnajc3a							lrp5
	grinab					dnajc3b							lrrc17
	grk4					dnajc5ab							lsm12b
	gse1					dnajc7							lsm14ab
	gskip					dnajc8							lsm3
	gsna					dnase1l1							lsm4
	gsnb					dnase1l4.1							lsm5
	gspt1l					dnmbp							lsm6
	gsta.1					dnmt3ba							lsm7
	gstm.3					dohh							lsm8
	gstp1					dpcd							lsp1
	gtf2f1					dpm1							lyar
	gtf2f2a					dpm2							macf1a
	gtf2h5					dpm3							mad2l1
	gtpbp4					dpp7							magoh
	h1f0					dpy30							magt1
	h1fx					drap1							mak16
	h2afva					dspa							manf
	h2afvb					dstyk							map1lc3b
	h2afx					dtd1							map2k6
	h2afx1					dtnbp1a							map3k7
	h2afy2					dusp6							mapkapk2a
	h3f3b.1					dut							mapre1b
	h3f3b.1.1					dvl2							marcksa
	h3f3b.1.2					dync1i2a							marcksb
	h3f3c					dync1li2							marcksl1a
	h3f3d					dynll1							marcksl1b
	hacd2					dynll2b							matn4
	hacd3					dynlrb1							matr3l1.1
	hadh					dynlt3							matr3l1.1.1
	hars					dyrk3							max
	hbae1.1					eaf2							mcl1a
	hbae1.1.1					ebag9							mcm2
	hbae1.3					ebf3a.1							mcm3
	hbae3					ebna1bp2							mcm4
	hbae5					echs1							mcm5
	hbbe1.1					eci1							mcm6
	hbbe1.2					ecpas							mcts1
	hbbe1.3					ecrg4a							mdh2
	hbbe2					edem1							mdka
	hbbe3					edem2							meaf6
	hbegfa					edf1							med10
	hcfc1a					eef1a1l1							med12
	hcfc1b					eef1b2							med19a
	hcls1					eef1da							med28
	hdac1					eef1db							med31
	hdgfl2					eef1g							mesd
	hdlbpa					eef2b							metap2b
	hdr					eef2k							metrnla
	hectd1					efnb2a							mfap1
	helz					egr1							mfap2
	hemgn					ehd1b							mgst3b
	hephl1a					ehmt1b							mibp
	her6					eif1ad							mibp2
	her9					eif1axa							midn
	hhip					eif1axb							mki67
	hhla2a.1					eif1b							mlf2
	hif1ab					eif2b1							mllt10
	hif1al					eif2b2							mmgt1
	higd1a					eif2b3							mmp14b
	hikeshi					eif2b4							mmp2
	hint1					eif2s1a							mob4
	hirip3					eif2s1b							morf4l1
	hist1h4l					eif2s2							mpc1
	hist2h2l					eif2s3							mphosph10
	histh1l					eif3ba							mphosph8
	hk1					eif3c							mrpl11
	hm13					eif3d							mrpl12
	hmbsa					eif3ea							mrpl30
	hmbsb					eif3f							mrpl36
	hmga1a					eif3g							mrpl57
	hmgb1a					eif3ha							mrps10
	hmgb1b					eif3i							mrps14
	hmgb2a					eif3ja							mrps16
	hmgb2b					eif3jb							mrps36
	hmgb3a					eif3k							mrps6
	hmgn2					eif3m							mrto4
	hmgn3					eif3s10							msh6
	hmgn6					eif3s6ip							msna
	hmgn7					eif4a1a							msx1b
	hnrnpa0a					eif4a1b							mt-atp6
	hnrnpa0b					eif4a3							mt-co1
	hnrnpa0l.1					eif4bb							mt-co2
	hnrnpa1b					eif4e1c							mt-co3
	hnrnpaba					eif4e2rs1							mt-cyb
	hnrnpabb					eif4ea							mtdha
	hnrnpc					eif4ebp1							mt-nd1
	hnrnpd					eif4ebp2							mt-nd2
	hnrnph1l					eif4ebp3l							mt-nd3
	hnrnpk					eif4g1a							mt-nd4
	hnrnpl					eif4g2a							mt-nd5
	hnrnpl2					eif4g2b							mtpn
	hnrnpm					eif4h							mybbp1a
	hnrnpua					eif5							mycb
	hnrnpub					eif5a							mycbp2
	hnrnpul1					eif5a2							mycla
	hnrpkl					eif5b							mycn
	hoxb3a					eif6							mydgf
	hoxc3a					elavl1a							myef2
	hp1bp3					elavl1b							myg1
	hpgd					elavl3							myh10
	hs6st2					elf1							myh7
	hsbp1b					elf3							myh9b
	hsp90aa1.2					ell2							myl12.1
	hsp90ab1					elob.1							myl12.2
	hsp90b1					elocb							myl6
	hspa4a					elof1							myl7
	hspa4b					elovl1b							myl9b
	hspa5					elovl6							myo18ab
	hspa8					emc1							MZT1
	hspa9					emc10							naa10
	hspd1					emc2							naa15a
	hspe1					emc3							naa20
	hspg2					emc6							naa38
	huwe1					emc7							naa40.1
	hyou1					emc8							naca
	hypk					emc9							nap1l1
	icn					emd							nasp
	icn2					eml2							nat8l
	id1					emp2							NC-002333.17
	id2a					enc1							NC-002333.4
	id3					enc3							ncapd2
	idh1					endouc							ncapg
	idh2					eno1a							ncbp2
	ier2a					eno3							ncl
	ier2b					eny2							ncln
	ier3ip1					ep300a							ncor2
	ier5					epas1a							ndnf
	ier5l					epb41a							ndufa10
	ifi30					epb41b							ndufa12
	igf1rb					EPB41L2							ndufa4l
	igf2a					epb41l5							ndufa6
	igf2bp1					epcam							ndufa8
	igf2bp3					epn3a							ndufab1a
	igfbp1a					epoa							ndufab1b
	igfbp2a					eprs							ndufb10
	igfbp5b					ergic1							ndufb2
	ik					ergic3							ndufb3
	il17rd					erh							ndufb4
	il6st					erlec1							ndufb5
	ilf2					erlin1							ndufb7
	ilf3b					ero1b							ndufb8
	ilk					erp44							ndufb9
	im:7150988					esd							ndufc2
	inhbb					esf1							ndufs2
	inppl1a					esrp1							ndufs3
	ipo7					esrp2							ndufs4
	iqgap1					esyt2a							ndufs5
	irf2bp1					etf1b							ndufs6
	irf2bp2b					etfa							ndufs7
	irs1					etfb							nedd8
	irx3a					etfdh							nedd8l
	ISCU (1 of many)					etnk1							neo1a
	ist1					etv5b							nfe2l3
	itga6b					eva1ba							nfkbiab
	itgav					evla							nfyba
	itgb1b.1					evpla							nfyc
	itgb1b.2					evplb							nhp2
	itgb4					ewsr1a							nid1b
	itm2ba					ewsr1b							nid2a
	itpkcb					exd2							nifk
	itsn2b					exoc1							nipblb
	jag1b					exoc2							nkap
	jdp2b					exosc2							nkd1
	jmjd1cb					eya1							nme2b.1
	jpt1b					ezrb							nme3
	jpt2					f11r.1							nmt1a
	jun					fa2h							nmt1b
	junba					fabp2							nnt
	junbb					fabp3							nolc1
	jund					faf2							nono
	jupa					fam114a1							nop10
	kank1a					fam133b							nop2
	kars					fam13b							nop53
	kctd12.2					fam162a							nop56
	kctd5a					fam168a							nop58
	kdelr2a					fam174b							notch2
	kdelr2b					fam192a							notch3
	kdelr3					fam20b							npm1a
	kdm1a					fam214a							npm1b
	kdm2ba					fam222bb							npm3
	kdm4b					fam32a							nr2f1a
	kdm5bb					fam3a							nr2f2
	kdm5c					fam3c							nr2f5
	kdm6ba					fam49a							nr2f6a
	kdm6bb					fam50a							nrarpa
	kera					fam53b							nrip1b
	khdrbs1a					fam76b							nrp2a
	khdrbs1b					fam83fa							nrp2b
	khsrp					FAM83G							nsa2
	klf2b					farp2							nsd1a
	klf5l					farsa							nsfl1c
	klf6a					farsb							nucb2a
	klf7b					faua							nucks1a
	kmt2bb					faub							nucks1b
	kmt2ca					fbl							nudc
	kmt2cb					fbxl6							nudcd2
	kmt5aa					fbxo11a							nudt21
	kpna3					fbxo9							nup153
	kpnb1					fcf1							nup50
	kpnb3					fcho2							nupr1a
	krt15					fdx1							nusap1
	krt17					fdx2							nutf2
	krt18a.1					fen1							nutf2l
	krt18b					fgfr1op							oaz1a
	krt222					fgfr1op2							oaz1b
	krt4					fhdc3							odc1
	krt5					fhit							oga
	krt8					fis1							ola1
	krt91					fkbp11							ostc
	krt92					fkbp1aa							oxsr1a
	krt96					fkbp2							p3h1
	krt97					fkbp4							p4hb
	krt99					flna							pa2g4a
	krtcap2					flot1b							pa2g4b
	krtt1c19e					flot2b							pabpc1a
	ktn1					fmr1							pabpn1
	lama5					fnbp4							paics
	lamb4					fosab							paip2b
	lamc1					fosl1a							pak2b
	lamtor2					fosl2							parp1
	large2					foxa3							pbdc1
	larp1b					foxe3							pbrm1l
	larp4ab					foxi3b							pbx4
	lasp1					foxj3							pcbd1
	lbr					FOXK2							pcbp2
	ldb1a					foxo3b							pcdh18b
	ldhba					foxo4							pcf11
	LEPROTL1					foxp1a							pclaf
	lgals1l1					foxp4							pcna
	lgals3a					FP085398.1							pcnt
	lgals3b					fpgs							pcolcea
	lgmn					fryl							pdap1a
	lig1					fscn1a							pdcd11
	lima1a					fstl1a							pdcd5
	lims1					fstl1b							pdcl
	lin28a					fth1a							pdgfra
	llgl2					fthl27							pdia3
	lman2					fthl28							pdia6
	lmf2b					fthl31							pds5a
	lmnb1					ftr83							pes
	lmnb2					ftsj3							pfdn1
	lmo2					fubp1							pfdn2
	lmo4a					fuca1.1							pfdn4
	lmo4b					fuca1.2							pfdn5
	lonrf1l					fuca2							pfdn6
	loxl2b					fundc1							pfn1
	lpp					fundc2							pfn2
	lrig2					fus							pfn2l
	lrp5					fxr1							pgrmc1
	lrpap1					fxr2							phb
	lrrc8da					fxyd1							phf5a
	lsm12b					fxyd6l							phgdh
	lsm14ab					fzd2							phlda2
	lsm3					fzd7b							pho
	lsm4					fzr1a							pias4a
	lsm5					g3bp1							pik3r1
	lsm6					gab1							pik3r2
	lsm7					gabarapa							pim1
	lsm8					gabarapb							pin1
	lsp1					gabarapl2							pin4
	luc7l					gadd45ba							pinx1
	lum					gadd45bb							pitx2
	luzp1					gadd45ga							pitx3
	lyar					gadd45gip1							pleca
	macf1a					gale							plk1
	mad2l1					galnt1							plod3
	magoh					galnt2							plpp3
	magt1					galnt6							plscr3b
	mak16					gapdhs							plxnb2a
	malb					gar1							pmaip1
	manf					gars							pmp22a
	map1lc3b					gatad2ab							pnisr
	map2k1					gatd1							pnn
	map2k6					gb:bc139872							pno1
	mapk12a					gbgt1l4							pnrc2
	mapkapk2a					gbp							podxl
	mapre1b					GCA							pole4
	marcksb					gch1							polr2a
	marcksl1a					gch2							polr2d
	marcksl1b					gclc							polr2eb
	matn4					gcnt4a							polr2f
	matr3l1.1.1					gcsha							polr2l
	max					gdi1							pomp
	mbd3a					gdi2							postnb
	mbnl2					gemin7							pou2f1b
	mbpb					gemin8							ppan
	mcl1a					get4							ppdpfb
	mcl1b					gfer							ppiaa
	mcm2					gfm1							ppiab
	mcm3					gga1							ppib
	mcm4					ggcx							ppid
	mcm5					ggnbp2							ppig
	mcm6					gid8b							ppih
	mcrip1					gigyf1b							ppm1g
	mcts1					ginm1							ppp1caa
	mdh2					gipc2							ppp1cab
	mdka					gkap1							ppp1cb
	mdn1					glb1l							ppp1r10
	meaf6					glo1							ppp1r14bb
	med10					glrx							ppp2cb
	med19a					glrx3							ppp2r1ba
	med28					glrx5							ppp2r1bb
	med31					glud1a							ppp2r5eb
	meis1a					glulb							ppp4cb
	meis1b					glyr1							ppp5c
	mesd					gm2a							ppp6r3
	metap2b					gmds							pprc1
	metrnla					gmfb							ppt1
	mfap2					gmnc							prdx2
	mfap4					gmnn							prdx3
	mgst2					gmppb							prdx4
	mgst3a					gmps							prelid1a
	mgst3b					gnai1							prelid3b
	mia3					gnai2a							prkab1b
	mibp					gnaia							prkar2aa
	mibp2					gnb1a							prmt1
	mid1ip1a					gnb1b							prpf19
	midn					gng2							prpf38b
	minos1					gng5							prpf39
	mki67					gnl2							prpf40a
	mknk2b					gnl3							prpf8
	mlf2					gnl3l							prps1a
	mllt10					gnpda2							prrc2a
	mllt3					gnpnat1							prrc2c
	mmgt1					gnptab							prrx1a
	mmp2					gnsa							psap
	mmp30					golga7							psip1b
	mob1a					golgb1							psma1
	mob3a					golph3							psma2
	morf4l1					golt1bb							psma3
	mpc1					gorasp2							psma4
	mpc2					gosr2							psma5
	mpdu1a					got2b							psma6a
	mphosph8					gpa33a							psma6b
	mprip					gpat3							psma8
	mpzl2b					GPATCH2							psmb1
	mrpl11					gpatch8							psmb2
	mrpl12					gpd1b							psmb3
	mrpl20					gphna							psmb4
	mrpl30					gpm6ab							psmb5
	mrpl33					gpn2							psmb6
	mrpl36					gpr108							psmb7
	mrpl54					gpr143							psmc1a
	mrpl57					gpr160							psmc2
	mrps10					gps1							psmc3
	mrps11					gpt2l							psmc4
	mrps14					gpx1a							psmc5
	mrps33					gpx4b							psmc6
	mrps36					grb2b							psmd1
	mrps6					grcc10							psmd12
	mrtfab					grhl2a							psmd13
	msna					grinab							psmd14
	msx1b					grpel1							psmd3
	mtap					grtp1b							psmd4b
	mt-atp6					gse1							psmd6
	mt-co1					gsk3ab							psmd7
	mt-co2					gsk3b							psmd8
	mt-co3					gskip							psme3
	mt-cyb					gsna							ptbp1a
	mtdha					gsnb							ptbp1b
	mthfd2					gspt1l							ptena
	mt-nd1					gstp1							ptenb
	mt-nd2					gstt1a							ptges3a
	mt-nd3					gtf2a1							ptges3b
	mt-nd4					gtf2a2							ptk7a
	mt-nd5					gtf2e2							ptmaa
	mtpn					gtf2f1							ptmab
	mtus1b					gtf2f2a							ptp4a1
	mxd3					gtf2h5							ptp4a2b
	MYADM					gtpbp1							puf60a
	mycb					gtpbp4							puf60b
	mycbp					guk1a							pum3
	mycbp2					gyg1a							qkia
	mych					h1f0							rab10
	mydgf					h1fx							rab11a
	myef2					h2afva							rab11ba
	myg1					h2afvb							rab13
	myh10					h2afx1							rab14
	myh9a					h2afy2							rab1ab
	myh9b					h3f3b.1							rab2a
	myl12.1					h3f3b.1.1							rab5aa
	myl12.2					h3f3b.1.2							rab5ab
	myl6					h3f3c							rab5c
	myl9b					h3f3d							rab5if
	mylk5					hacd2							rac1a
	myo18ab					hadh							rack1
	myo1cb					hadhb							rad21a
	myo1eb					hagh							rad23b
	myo9ab					hars							ran
	myo9b					hat1							ranbp1
	myof					hax1							ranbp3b
	naa10					hbae1.1							rangap1b
	naa15a					hbae1.1.1							rap1aa
	naa20					hbae1.3							rap1b
	naa38					hbae3							rap2c
	naa40.1					hbbe1.1							raraa
	naca					hbbe1.2							rasgef1ba
	nanos1					hbbe1.3							rbb4l
	nap1l1					hbbe2							rbbp4
	nap1l4a					hbbe3							rbbp6
	napab					hbp1							rbfox2
	naprt					hccsa.1							rbm14a
	NC-002333.17					hccsb							rbm22
	NC-002333.4					hcfc1a							rbm24a
	ncapd2					hcfc1b							rbm25b
	ncbp2					hdac1							rbm39a
	nccrp1					hddc3							rbm39b
	nck1b					hdgfl2							rbm4.2
	nckap1					hdlbpa							rbm4.3
	ncl					he1.1							rbm8a
	ncln					he1.2							rbms1a
	ncoa4					hectd1							rbms2b
	ncoa5					helz							rbmx
	ndfip1					her15.1.1							rbp5
	ndst2a					her2							rbpms2b
	ndufa4l					her9							rbx1
	ndufa6					herpud1							rcc2
	ndufa8					hexb							rcn1
	ndufab1a					hexim1							rcor1
	ndufab1b					hiat1a							rcor2
	ndufb10					hiat1b							reep5
	ndufb2					hic1l							rer1
	ndufb3					hif1ab							rfc3
	ndufb4					hif1al							rfc4
	ndufb5					hif1an							rfesd
	ndufb6					higd1a							rgl1
	ndufb7					higd2a							rgmd
	ndufb8					hikeshi							rhebl1
	ndufb9					hint1							rhoaa
	ndufc2					hint2							rhoab
	ndufs2					hist1h4l							rhoac
	ndufs3					hist2h2l							rhocb
	ndufs4					histh1l							rif1
	ndufs5					hk1							rimkla
	ndufs6					hm13							rnaseh2a
	ndufs7					hmbsa							rnd3a
	nedd8					hmg20b							rnf10
	nenf					hmga1a							rnf2
	neo1a					hmgb1a							rnf40
	net1					hmgb1b							rnf44
	nfatc3a					hmgb2a							rnf7
	nfe2l2a					hmgb2b							rock2a
	nfe2l3					hmgb3a							romo1
	nfil3-5					hmgb3b							rpa1
	nfyba					hmgcl							rpa2
	nfyc					hmgn2							rpa3
	nhp2					hmgn3							rpf2
	nid1b					hmgn6							rpl10
	nid2a					hmgn7							rpl10a
	nifk					hmmr							rpl11
	nipblb					hnrnpa0a							rpl12
	nkap					hnrnpa0b							rpl13
	nme2b.1					hnrnpa0l.1							rpl13a
	nme3					hnrnpa1b							rpl14
	nmt1a					hnrnpaba							rpl15
	nmt1b					hnrnpabb							rpl17
	nnt					hnrnpc							rpl18
	nolc1					hnrnpd							rpl18a
	nono					hnrnph1l							rpl19
	nop10					hnrnpk							rpl21
	nop16					hnrnpl							rpl22
	nop2					hnrnpl2							rpl22l1
	nop53					hnrnpm							rpl23
	nop56					hnrnpua							rpl23a
	nop58					hnrnpub							rpl24
	notch2					hnrnpul1							rpl26
	notch3					hnrpkl							rpl26.1
	nova2					homer3b							rpl27
	npc2					hopx							rpl28
	npm1a					hp1bp3							rpl29
	npm1b					hpca							rpl3
	npm3					hprt1							rpl30
	nr2f2					hps1							rpl31
	nr2f5					hps4							rpl32
	nr2f6a					hsbp1a							rpl34
	nr2f6b					hsbp1b							rpl35
	nr3c1					hsd17b10							rpl35a
	nr4a1					hsd17b12a							rpl36
	nrarpa					hsd17b14							rpl36a
	nrip1b					hsdl2							rpl37.1
	nsa2					hsf2							RPL37A
	nsfl1c					hsp70.3							rpl38
	nucb1					hsp90aa1.2							rpl39
	nucb2a					hsp90ab1							rpl4
	nucks1a					hsp90b1							rpl5a
	nucks1b					hspa14							rpl5b
	nudc					hspa4a							rpl6
	nudcd3					hspa4b							rpl7
	nudt21					hspa5							rpl7a
	nufip2					hspa8							rpl7l1
	nup50					hspa9							rpl8
	nup62l					hspd1							rpl9
	nupr1a					hspe1							rplp0
	nupr1b					htatsf1							rplp1
	nutf2					huwe1							rplp2
	nutf2l					hyou1							rplp2l
	oaz1a					hypk							rpn1
	oaz1b					iah1							rps10
	oclna					iars							rps11
	odc1					icn							rps12
	oga					icn2							rps13
	ogdha					id1							rps14
	ogna					id2a							rps15
	oip5-as1					id2b							rps15a
	ola1					id3							rps16
	olfm2b					id4							rps17
	ost4					idh1							rps18
	ostc					idh2							rps19
	ostf1					idh3a							rps19bp1
	otub1a					idh3b							rps2
	otub1b					idh3g							rps20
	otx1					ier2a							rps21
	oxsr1a					ier2b							rps23
	oxsr1b					ier3ip1							rps24
	p3h1					ier5							rps25
	p4ha1b					ier5l							rps26
	p4hb					ifi30							rps26l
	pa2g4a					ifrd1							rps27.1
	pa2g4b					ift140							rps27.2
	pabpc1a					igf2bp1							rps27a
	pabpc1b					igf2bp2b							rps27l
	pabpn1					igf2bp3							rps28
	pacsin2					igfbp3							rps29
	pacsin3					igfbp5b							rps3
	padi2					igsf9a							rps3a
	pafah1b3.1					ik							rps4x
	pagr1					il10rb							rps5
	paip2b					ildr1a							rps6
	pak2a					ilf2							rps7
	pak2b					ilf3a							rps8a
	palld					ilf3b							rps9
	palm3					ilk							rpsa
	papss2b					immt							rras
	parp1					imp3							rrbp1a
	pbdc1					impdh1b							rrbp1b
	pbx4					ing2							rrm1
	pcbp2					ing3							rrm2.1
	pcdh19					ing4							rrp1
	pcdh7b					inhbaa							rrp12
	pcf11					inip							rrs1
	pclaf					inka1a							rsf1b.1
	pcna					inppl1a							rsl1d1
	pcxa					insm1a							rsl24d1
	pdap1a					insm1b							rsrc2
	pdcd10a					ints13							rtca
	pdcd11					ip6k2b							rtf1
	pdcd4a					ipo7							rtn4a
	pdcd5					irf2a							rwdd1
	pdcd6					irs2b							sae1
	pdcl					ISCU (1 of many)							safb
	pdha1a					isl1							sall4
	pdia3					ist1							sap18
	pdia4					isy1							sap30l
	pdia5					itm2ba							sarnp
	pdia6					itpkca							sars
	pdlim1					itpkcb							sart1
	pds5a					itpr3							sart3
	pdzd11					itsn2b							sash1a
	pelo					ivd							sat1a.2
	pelp1					ivns1abpa							scaf1
	perp					ivns1abpb							scaf4a
	pes					jagn1b							scarb2a
	pfdn1					jam3b							sdc4
	pfdn2					jdp2b							sdcbp2
	pfdn4					jmjd1cb							sec11a
	pfdn5					josd2							sec13
	pfdn6					jpt1b							sec61a1
	pfkfb4b					jpt2							sec61b
	pfn1					jun							sec61g
	pfn2					junba							sec63
	pfn2l					junbb							seh1l
	pgam5					jund							selenof
	pgrmc1					jupa							selenoh
	pgrmc2					kansl1a							selenon
	phactr4a					kansl1b							selenot1a
	phb					kars							selenot1b
	phb2a					kat7b							selenow1
	phf5a					kbtbd8							selenow2a
	phgdh					kctd12.2							sem1
	phlda2					kctd5a							sept10
	phldb1b					kdelr2a							sept15
	pho					kdelr2b							sept2
	phrf1					kdelr3							sept6
	pias4a					kdm1a							sept7a
	pik3r1					kdm3b							sept7b
	pik3r2					kdm4b							serbp1a
	pim1					kdm5ba							serf2
	pin1					kdm5bb							serinc5
	pin4					kdm5c							serp1
	pinx1					kdm6ba							serpinh1a
	pitpnaa					kdm6bb							serpinh1b
	pitpnbl					kdm7ab							seta
	pitpnc1b					keap1a							setb
	pitx2					khdrbs1a							sf1
	pkp3a					khdrbs1b							sf3a1
	plcd1b					khsrp							sf3a2
	pleca					kif22							sf3a3
	plecb					KIF2A							sf3b1
	plekha6					kif5ba							sf3b2
	plekhh1					kirrel3l							sf3b3
	plk1					klf11a							sf3b5
	plod1a					klf11b							sf3b6
	plod3					klf17							sfpq
	pls3					klf3							sgk1
	plscr3b					klf5l							sgta
	plxnb2a					klf6a							shroom4
	pmp22a					klf7b							si:ch1073-325m22.2
	pnisr					klhl24b							si:ch211-11n16.3
	pnn					kmt2bb							si:ch211-133n4.4
	pno1					kmt2ca							si:ch211-156b7.4
	pnp5a					kmt2cb							si:ch211-156j16.1
	pnrc2					kmt5aa							si:ch211-160j14.3
	pole4					kpna3							si:ch211-160o17.4
	polr2a					kpna4							si:ch211-161h7.4
	polr2d					kpnb1							si:ch211-196l7.4
	polr2eb					kri1							si:ch211-198a12.6
	polr2f					krt18a.1							si:ch211-212k18.4
	polr2h					krt18b							si:ch211-217k17.7
	polr2l					krt1-c5							si:ch211-222l21.1
	pomp					krt4							si:ch211-248e11.2
	postnb					krt5							si:ch211-271b14.1
	pou2f1b					krt8							si:ch211-276i12.11
	ppa1b					krt91							si:ch211-286b5.5
	ppan					krt92							si:ch211-286o17.1
	ppdpfb					krt96							si:ch211-288g17.3
	ppiaa					krt97							si:ch211-51e12.7
	ppiab					krtcap2							si:ch73-1a9.3
	ppib					ktn1							si:ch73-281n10.2
	ppid					kxd1							si:ch73-308l14.2
	ppifb					lad1							si:ch73-335l21.4
	ppig					lamp1b							si:ch73-46j18.5
	ppih					lamp2							si:ch73-86n18.1
	ppil1					lamtor2							si:dkey-108k21.10
	ppl					lamtor3							si:dkey-112e7.2
	ppm1g					lamtor4							si:dkey-151g10.6
	ppp1caa					lamtor5							si:dkey-159f12.2
	ppp1cab					laptm4a							si:dkey-195m11.8
	ppp1cb					laptm4b							si:dkey-239h2.3
	ppp1r10					larp1b							si:dkey-23i12.5
	ppp1r12a					larp4ab							si:dkey-42i9.4
	ppp1r13l					larp7							si:dkey-56m19.5
	ppp1r14aa					larsb							si:dkey-67c22.2
	ppp1r14bb					lasp1							si:dkey-6n21.12
	ppp1r1b					lbr							si:dkey-7j14.6
	ppp1r3b					lclat1							si:dkeyp-113d7.1
	ppp1r3ca					lcmt1							si:rp71-45k5.4
	ppp1r9alb					lcorl							sinhcafl
	PPP2CA					ldb1a							sinhcafl.1
	ppp2cb					ldha							six1a
	ppp2r1ba					ldhba							skp1
	ppp2r1bb					leo1							slbp
	ppp2r2d					LEPROTL1							slc11a2
	ppp2r5eb					letm2							slc12a2
	ppp3ccb					lgals3a							slc20a1b
	ppp3r1b					lgals3b							slc20a2
	ppp4cb					lgmn							slc25a3b
	ppp6c					lig1							slc25a5
	ppp6r3					lima1a							slc25a55a
	ppt1					lims1							slc29a1a
	prdx2					lin37							slc30a7
	prdx3					lin7c							slc38a5b
	prdx4					lipf							slc39a7
	prdx5					litaf							slc43a1a
	prdx6					llgl2							slc4a1a
	prelid1a					llph							slirp
	prelid3b					lman1							sltm
	prickle1b					lman2							smad5
	prkab1b					lmf2b							smad7
	prkacbb					lmna							smarca4a
	prkag1					lmnb1							smarca5
	prkar2aa					lmnb2							smarcc1a
	prkcsh					lmo2							smarcd1
	prmt1					LO017965.1							smarce1
	prpf38b					lonp1							smc1al
	prpf39					lonrf1l							smc2
	prpf40a					lpl							smc3
	prpf8					lrba							smc4
	prps1a					lrig2							smdt1b
	prr12a					lrmda							smek1
	prr13					lrp10							smim15
	prrc2a					lrpap1							smndc1
	prrc2c					lrrc47							smo
	prrg2					lrrc59							snai1a
	prss23					lrrfip2							snd1
	prtfdc1					lsm12b							snrnp200
	psap					lsm14ab							snrnp27
	psenen					lsm3							snrnp70
	psip1b					lsm4							snrpa
	psma1					lsm5							snrpa1
	psma2					lsm6							snrpb
	psma3					lsm7							snrpb2
	psma4					lsm8							snrpc
	psma5					lsp1							snrpd1
	psma6a					lsr							snrpd2
	psma6b					ltv1							snrpd3l
	psma8					luc7l							snrpe
	psmb1					luc7l3							snrpf
	psmb2					lyar							snrpg
	psmb3					lypla2							sntb2
	psmb4					lyrm4							snu13b
	psmb5					lyrm5a							snw1
	psmb6					lysmd3							snx12
	psmb7					lztfl1							snx3
	psmc1a					mad2l1							socs3b
	psmc1b					madd							sod1
	psmc2					mafaa							sost
	psmc3					maff							sox11a
	psmc4					magoh							sox6
	psmc5					magt1							sparc
	psmc6					mak16							spcs1
	psmd1					malb							spcs2
	psmd11b					man1a1							spcs3
	psmd12					man2b1							spen
	psmd13					manf							spry2
	psmd14					map1lc3a							spry4
	psmd3					map1lc3b							sptan1
	psmd4a					map2k2a							sptb
	psmd7					map2k6							srcap
	psmd8					map3k7							srgap2
	psme3					mapk14b							sri
	ptbp1a					mapk6							srp19
	ptbp1b					mapkapk2a							srp54
	ptena					mapre1b							srpra
	ptgdsb.1					march5l							srprb
	ptges3a					march6							srrm1
	ptges3b					marcksb							srrm2
	ptgs1					marcksl1a							srrt
	ptgs2a					marcksl1b							srsf10b
	ptk2bb					MARK4							srsf11
	ptmaa					mars							srsf1a
	ptmab					mat2b							srsf2a
	ptp4a1					matr3l1.1							srsf3b
	ptp4a2b					matr3l1.1.1							srsf4
	ptprfb					max							srsf5a
	ptprk					mbd3a							srsf5b
	puf60a					mbd3b							srsf6a
	puf60b					mbnl2							srsf6b
	pum3					mbnl3							srsf7a
	purba					mboat1							ssb
	pvalb8					mbpb							ssbp3b
	pxna					mccc2							ssr2
	pycard					mcfd2							ssr3
	qkia					mcl1a							ssr4
	rab10					mcl1b							ssrp1a
	rab11a					mcm2							ssuh2rs1
	rab11ba					mcm3							stag2b
	rab13					mcm4							stau2
	rab14					mcm5							stip1
	rab1ab					mcm6							stmn1a
	rab1ba					mcrip1							STMP1
	rab2a					mctp2b							stom
	rab41					mcts1							strn3
	rab42b					mdh1aa							sub1a
	rab5aa					mdh1ab							suclg1
	rab5ab					mdh2							sult6b1
	rab5c					mdka							sumo2b
	rab5if					mdkb							sumo3a
	rab6a					mdm2							sumo3b
	rac1a					mdn1							supt16h
	rac2					meaf6							supt4h1
	rack1					med1							supt6h
	rad21a					med10							suv39h1b
	rad23b					med11							syf2
	ralgps2					med12							syncrip
	ran					med19a							szrd1
	ranbp1					med21							taf12
	ranbp3b					med28							taf13
	rap1aa					med30							taf15
	rap1b					med31							taf3
	rap2c					MED9							taf7
	rarga					mef2aa							taf9
	rbb4l					mef2d							tal1
	rbbp4					megf8							taok1a
	rbbp6					mesd							tardbp
	rbfox2					metap2b							tardbpl
	rbm14a					mettl9							tbca
	rbm14b					mfap1							tbcb
	rbm22					mfap3l							tbl1xr1a
	rbm25b					mff							tcea1
	rbm39a					mfsd2ab							tcf12
	rbm39b					mfsd6a							tcf3b
	rbm4.2					MGARP							tcp1
	rbm4.3					mgat4b							tead1b
	rbm8a					mgat5							tenm3
	rbms1a					mgll							tet3
	rbms2b					mgp							tfam
	rbmx					mgst2							tfg
	rbp4					mgst3a							tgfb1a
	rbx1					mgst3b							tgfbi
	rcc2					mia2							tgif1
	rcn1					mia3							thoc2
	rcn3					mib1							thrap3b
	reep3b					mibp							tia1
	reep5					mibp2							tia1l
	rer1					mical3b							timm10
	rfesd					mid1ip1a							timm13
	rgcc					mid1ip1b							timm17a
	rgma					mid1ip1l							timm8b
	rgmb					midn							timm9
	rhbdf1a					mier1a							tjp1a
	rhbdl2					minos1							tktb
	rhebl1					mios							tle2a
	rhoaa					mitfa							tln1
	rhoab					mki67							tma7
	rhoac					mkrn1							tmed10
	rhoca					mlf2							tmed2
	rhocb					mlst8							tmed7
	rhoub					mlx							tmed9
	rimkla					mmgt1							tmeff1b
	rnaset2					mob1a							tmem11
	rnd3a					mob3a							tmem119b
	rnf10					mob4							tmem147
	rnf170					mocos							tmem14ca
	rnf2					mocs2							tmem167a
	rnf38					mogs							tmem258
	rnf40					mon1bb							tmem33
	rnf44					mon2							tmem35
	rnf7					morc2							tmem88a
	robo3					morf4l1							tmem88b
	rock2a					mospd2							tmpoa
	romo1					mpc1							tmsb4x
	rpa2					mpc2							tnc
	rpa3					mphosph10							tnn
	rpe65b					mphosph6							tnni1b
	rpf2					mphosph8							tnnt2a
	rpl10					mpp1							tnpo2
	rpl10a					mpv17							tnrc6a
	rpl11					mrpl11							tnrc6b
	rpl12					mrpl12							tnrc6c1
	rpl13					mrpl13							tob1b
	rpl13a					mrpl15							tomm20a
	rpl14					mrpl17							tomm20b
	rpl15					mrpl18							tomm22
	rpl17					mrpl20							tomm40
	rpl18					mrpl23							tomm40l
	rpl18a					mrpl24							tomm5
	rpl19					mrpl27							tomm6
	rpl21					mrpl28							tomm7
	rpl22					mrpl30							top1l
	rpl22l1					mrpl32							top2a
	rpl23					mrpl33							top2b
	rpl23a					mrpl34							tp53
	rpl24					mrpl35							tpd52l2b
	rpl26					mrpl36							tpi1b
	rpl26.1					mrpl37							tpm3
	rpl27					mrpl38							tpm4a
	rpl28					mrpl40							tpra
	rpl29					mrpl42							tprb
	rpl3					mrpl47							tpt1
	rpl30					mrpl54							tpx2
	rpl31					mrpl57							tra2a
	rpl32					mrps10							tram1
	rpl34					mrps11							trim33
	rpl35					MRPS12							trim71
	rpl35a					mrps14							trip12
	rpl36					mrps15							trmt112
	rpl36a					mrps16							trnau1apb
	rpl37.1					mrps18a							tspan7
	RPL37A					mrps18c							tspo
	rpl38					mrps21							tsr2
	rpl39					mrps24							ttn.1
	rpl4					mrps25							ttn.2
	rpl5a					mrps30							tuba1a
	rpl5b					mrps33							tuba1b
	rpl6					mrps35							tuba8l
	rpl7					mrps36							tuba8l2
	rpl7a					mrps6							tuba8l3
	rpl7l1					mrps7							tuba8l4
	rpl8					msi2b							tubb2b
	rpl9					msna							tubb4b
	rplp0					msx1b							tubb5
	rplp1					mt2							twist1a
	rplp2					mta2							twistnb
	rplp2l					mtap							txn
	rpn1					mt-atp6							txn2
	rps10					mtbl							txndc17
	rps11					mtch2							txndc5
	rps12					mt-co1							txndc9
	rps13					mt-co2							txnipa
	rps14					mt-co3							txnl1
	rps15					mt-cyb							txnrd3
	rps15a					mtdha							u2af1
	rps16					mtfr1							u2af2b
	rps17					mthfd1b							u2surp
	RPS17					mt-nd1							uba1
	rps18					mt-nd2							uba52
	rps19					mt-nd3							ubap2b
	rps19bp1					mt-nd4							ubap2l
	rps2					mt-nd5							UBB
	rps20					mtpn							ubc
	rps21					mvb12a							ube2c
	rps23					mvp							ube2d1b
	rps24					mxd3							ube2d2
	rps25					mxi1							ube2e1
	rps26					myb							ube2e2
	rps26l					mybbp1a							ube2e3
	rps27.1					mycb							ube2ia
	rps27.2					mycbp							ube2ib
	rps27a					mycbp2							ube2l3a
	rps27l					mych							ube2l3b
	rps28					myclb							ube2na
	rps29					mycn							ube2v1
	rps3					mydgf							ube2v2
	rps3a					myef2							ubqln4
	rps4x					myg1							ubr7
	rps5					myh10							ubtf
	rps6					myh9a							ubtfl
	rps6ka3a					myl12.1							ubxn1
	rps6kb1b					myl12.2							ucp2
	rps7					myl6							uhrf1
	rps8a					myl9a							upf1
	rps9					myl9b							upf3b
	rpsa					myo5aa							uqcr10
	rras					myo5b							uqcrc1
	rrbp1a					myo6a							uqcrc2a
	rrbp1b					myt1b							uqcrfs1
	rrm1					naa10							uqcrh
	rrm2.1					naa15a							uqcrq
	rrp12					naa20							uri1
	rsl1d1					naa38							urod
	rsl24d1					naa40.1							usp1
	rtf1					naca							usp10
	rtn4a					naga							usp36
	rwdd1					nansa							usp5
	s100a10b					nap1l1							usp7
	s100u					nap1l4a							usp9
	s100v1					napab							UTP14C
	s100v2					nasp							utp3
	sae1					NAV1 (1 of many)							vamp3
	safb					nav2b							vangl2
	sap18					NC-002333.17							vasna
	sap30l					NC-002333.4							vaspb
	sar1b					ncalda							vat1
	sarnp					ncbp2							vbp1
	sars					nccrp1							vcam1b
	sart1					nck1b							vcanb
	scaf1					nckap1							vcp
	scaf4a					ncl							vdac1
	scamp2					ncln							vdac2
	scamp4					ncoa2							vdac3
	scarb2a					ncor1							vma21
	scinla					ncor2							waca
	scpep1					ndfip1							wasf3b
	sdc4					ndfip1l							wdr43
	sdcbp2					ndnl2							wdr5
	sdf2l1					ndrg1a							wdr82
	sdf4					ndrg3a							wdr83os
	sdhb					ndrg3b							wls
	sdhc					ndufa1							wtap
	sdr16c5a					ndufa10							xbp1
	sec11a					ndufa11							yap1
	sec13					ndufa12							ybx1
	sec22ba					ndufa2							yeats4
	sec23a					ndufa3							ylpm1
	sec31a					ndufa4l							ythdf1
	sec61a1					ndufa5							ythdf2
	sec61a1l					ndufa6							ywhaba
	sec61b					ndufa7							ywhabb
	sec61g					ndufa8							ywhabl
	sec62					ndufa9a							ywhae1
	sec63					ndufab1a							ywhae2
	selenof					ndufab1b							ywhah
	selenoh					ndufaf3							ywhaqa
	selenok					ndufb10							ywhaqb
	selenom					ndufb2							ywhaz
	selenot1a					ndufb3							yy1a
	selenot1b					ndufb4							zbtb16a
	selenot2					ndufb5							zc3h11a
	selenou1a					ndufb6							zc3h13
	selenow1					ndufb7							zc3h15
	selenow2a					ndufb8							zc3h18
	sem1					ndufb9							zc4h2
	sema3aa					ndufc2							zeb2a
	sema4e					ndufs2							zfand3
	sept10					ndufs3							zfand5b
	sept12					ndufs4							zfhx3
	sept15					ndufs5							zfhx4
	sept2					ndufs6							zfp36l2
	sept6					ndufs7							zfr
	sept7a					ndufs8a							zgc:110216
	sept7b					ndufv1							zgc:110339
	sept8a					ndufv2							zgc:110425
	sept9a					ndufv3							zgc:110540
	serbp1a					necap2							zgc:111986
	serf2					nectin4a							zgc:153115
	serinc1					nedd4l							zgc:153675
	serinc5					nedd8							zgc:153867
	serp1					nek7							zgc:158463
	SERP1					nenf							zgc:158564
	serpine2					net1							zgc:158803
	serpinh1a					neurod1							zgc:162730
	serpinh1b					neurod4							zgc:163057
	seta					nfatc3a							zgc:165555.12
	setb					nfe2l1b							zgc:173552.3
	sf1					nfe2l2a							zgc:193541
	sf3a1					nfe2l3							zgc:56095
	sf3a2					nfkbiab							zgc:56106
	sf3b1					nfkbib							zgc:56304
	sf3b2					nfyba							zgc:56676
	sf3b3					nfyc							zgc:66433
	sf3b5					nhp2							zgc:77086
	sf3b6					nid2a							zgc:77849
	sfpq					nifk							zgc:86598
	sft2d1					nipa2							zgc:91910
	sgk1					nipal3							zgc:92606
	sgta					nipal4							zgc:92664
	sh3bgrl					nipblb							zic2a
	sh3bgrl3					nkain1							zic3
	sh3d21					nkap							zmat2
	sh3gl1a					nme2b.1							zmiz1a
	sh3pxd2b					nme3							znf1035
	shc1					nme4							znf318
	si:ch1073-190k2.1					nmt1a							znf346
	si:ch1073-325m22.2					nnt							znf576.2
	si:ch1073-396h14.1					nol12							znf593
	si:ch1073-406l10.2					nol7							znf609b
	si:ch211-11k18.4					nolc1							znf706
	si:ch211-152c2.3					nomo							znf865
	si:ch211-160o17.4					nono							znfl2a
	si:ch211-166a6.5					nop10							zranb2
	si:ch211-191j22.3					nop16							zswim5
	si:ch211-195b11.3					nop2							zulu
	si:ch211-196l7.4					nop53
	si:ch211-198a12.6					nop56
	si:ch211-212k18.4					nop58
	si:ch211-214j24.10					notch3
	si:ch211-217k17.7					nova2
	si:ch211-222l21.1					npc1
	si:ch211-226m16.2					npc2
	si:ch211-22i13.2					npepl1
	si:ch211-242b18.1					npepps
	si:ch211-243g18.2					npl
	si:ch211-250c4.4					npm1a
	si:ch211-271b14.1					npm1b
	si:ch211-276i12.11					npm3
	si:ch211-284b7.3					nqo1
	si:ch211-284f22.3					nr2f5
	si:ch211-286b5.5					nr2f6a
	si:ch211-288g17.3					nr2f6b
	si:ch211-51e12.7					nr3c1
	si:ch211-67e16.11					nrbf2b
	si:ch73-138n13.1					nrbp1
	si:ch73-1a9.3					nrd1a
	si:ch73-238c9.1					nsa2
	si:ch73-281n10.2					nsd2
	si:ch73-308l14.2					nsfl1c
	si:ch73-335l21.4					nsrp1
	si:ch73-46j18.5					nt5dc2
	si:ch73-86n18.1					ntan1
	si:dkey-102c8.3					nucb2a
	si:dkey-112e7.2					nucb2b
	si:dkey-117n7.2					nucks1a
	si:dkey-117n7.5					nucks1b
	si:dkey-151g10.6					nudc
	si:dkey-159f12.2					nudcd2
	si:dkey-16l2.20					nudcd3
	si:dkey-16p21.8					nudt21
	si:dkey-187e18.1					nufip2
	si:dkey-195m11.8					nup153
	si:dkey-199f5.8					nup205
	si:dkey-204f11.64					nup210
	si:dkey-222f8.3					nup50
	si:dkey-230p4.1					nup62l
	si:dkey-239h2.3					nupr1a
	si:dkey-23i12.5					nupr1b
	si:dkey-28b4.7					nus1
	si:dkey-42i9.4					nutf2
	si:dkey-43p13.5					nutf2l
	si:dkey-67c22.2					oaz1a
	si:dkey-6n21.12					oaz1b
	si:dkey-7j14.6					oaz2a
	si:dkey-87o1.2					ociad2
	si:dkey-95p16.2					oclna
	si:dkeyp-113d7.1					oclnb
	si:dkeyp-44a8.2					odc1
	si:rp71-45k5.4					oga
	si:zfos-1192g2.3					ogdha
	sinhcafl					ogt.1.1
	sirt2					ola1
	six1b					ormdl1
	ska2					ormdl2
	skp1					os9
	slbp					osbpl10b
	slc11a2					ost4
	slc1a3a					ostc
	slc20a1b					otub1a
	slc25a24					otub1b
	slc25a3b					otud5b
	slc25a5					oxsr1a
	slc25a55a					p4ha1b
	slc30a7					p4hb
	slc35c2					pa2g4a
	slc35d1a					pa2g4b
	slc35e1					pabpc1a
	slc38a10					pabpc1b
	slc38a5b					pabpn1
	slc39a7					pacsin2
	slc4a1a					pafah1b1a
	slc6a9					pafah1b1b
	slc9a6a					pafah1b3.1
	slirp					pag1
	slit2					pah
	slit3					paics
	sltm					paip2b
	smad5					pak2a
	smap1					pak2b
	smarca4a					palm1b
	smarcc1a					pam16
	smarcd1					papola
	smarce1					papss2b
	smc1al					parn
	smc3					parp1
	smdt1b					parp16
	smek1					pawr
	smg7					pax7a
	smim13					pax7b
	smim15					pbdc1
	smim7					pbx4
	smndc1					pbxip1b
	smo					pcbd1
	smox					pcbp2
	snd1					pcbp4
	snrnp200					pcdh10a
	snrnp27					pcdh2g17
	snrnp70					pcm1
	snrpa					pcna
	snrpa1					pcnp
	snrpb					pcxa
	snrpc					pdap1a
	snrpd1					pdap1b
	snrpd2					pdcd10a
	snrpd3l					pdcd10b
	snrpe					pdcd11
	snrpf					pdcd4a
	snrpg					pdcd4b
	snu13b					pdcd5
	snw1					pdcd6
	snx12					pdcd6ip
	snx3					pdcl
	snx5					pde7a
	snx6					pdha1a
	socs3a					pdhb
	sod1					pdhx
	sox11a					pdia3
	sox2					pdia5
	sox21a					pdia6
	sox3					pdpk1a
	sox6					pds5a
	sp4					pds5b
	sp6					pdxdc1
	sp8a					pdzd11
	spaca4l					pef1
	sparc					pelo
	spcs1					pelp1
	spcs2					pepd
	spcs3					perp
	spen					pes
	spint1a					pfas
	spry2					pfdn1
	spry4					pfdn2
	sptan1					pfdn4
	sptb					pfdn5
	sptbn2					pfdn6
	sptlc2b					pfkfb4b
	sptssa					pfkpa
	srcap					pfn1
	srgap2					pfn2
	sri					pfn2l
	srm					pgam1a
	srp19					pgam5
	srp54					pgd
	srp68					pgk1
	srpra					pgm1
	srprb					pgp
	srrm1					pgrmc1
	srrm2					pgrmc2
	srrt					phactr4a
	srsf10b					phb
	srsf11					phb2a
	srsf1a					phb2b
	srsf2a					phf14
	srsf3b					phf3
	srsf4					phf5a
	srsf5a					phgdh
	srsf5b					phlda1
	srsf6a					phlda2
	srsf6b					pho
	srsf7a					phpt1
	srsf9					phrf1
	ssb					phyhd1
	ssr2					pi4k2a
	ssr3					pi4k2b
	ssr4					pi4kb
	ssrp1a					pias4a
	ssuh2rs1					pigf
	st14a					pik3c2b
	stab2					pik3c3
	stag2b					pik3ip1
	stau2					pik3r2
	stim1a					pik3r3b
	stip1					pim1
	stmn1a					pim2
	STMP1					pin1
	strap					pin4
	strn3					pinx1
	stt3b					pip4k2ca
	stx12					pir
	sub1a					pitpnaa
	suclg1					pitpnbl
	sult1st1					pitpnc1b
	sult2st1					pitx2
	sult6b1					pkma
	sumo1					pkp3a
	sumo2b					pla2g15
	sumo3a					plcd1a
	sumo3b					plcd1b
	supt16h					plcg1
	supt4h1					pleca
	supt6h					plecb
	svild					plekhj1
	syf2					plin6
	syncrip					plk2b
	syne3					pllp
	sypl2a					plod3
	tab2					plpp1a
	taf10					plpp2b
	taf12					plpp5
	taf13					plrg1
	taf15					plscr3b
	taf3					plxnb2a
	taf9					pmela
	tagln2					pmm2
	taok1a					pmp22a
	tardbp					pmpcb
	tardbpl					pnisr
	tax1bp3					pnn
	tbca					pno1
	tbcb					pnp4a
	tcf3b					pnpla6
	tcp1					pnrc2
	tdh					pof1b
	tead1b					poldip2
	tefa					pole3
	tent4b					pole4
	tes					polr1d
	tet3					polr2a
	tfam					polr2b
	tfap2a					polr2c
	tfap2c					polr2d
	tfg					polr2eb
	tgfb1a					polr2f
	tgfbi					polr2h
	tgif1					polr2l
	tgm2b					polr3h
	thbs1b					polr3k
	thbs3a					pomp
	thoc2					postnb
	thrap3b					pou2f3
[truncated: 1,399 more rows]

## Sheet: Narrow_Plots
	Comparison between Genes expressed in EC clusters (e.g. SDECs) and Gene annotaion of same anatomical structure (e.g. Somite) based on annotation from AmiGO (Consortium, 2019)
	Expression of overlapping genes was compared in same cluster (e.g. SDECs) between 15 ss and 22 hpf and divided into DE genes that are upregulated (Up) on downregulated (Down)
							Summary tables for figure 2 and Supplementary Fig.4
DE Genes for Biological Function														DE Genes for Violin Plots
SDECs		BVECs-I		KVECs										SDECs		BVECs-I		KVECs
Up	Down	Up	Down	Up	Down									Up	Down	Up	Down	Up	Down
aldoaa	axin1	aldoaa	cxcl12a	acp1	ap1m2									aldoaa	rtf1	etf1b	rpl36	atp6v0d1	sec61a1l
cav1	cdh2	cdh2	cxcl12b	atp6v0d1	bmp4		<==	1) Make Violin plots for all these genes						rap1b	gadd45bb	myh10	rps19	elovl1b	etv5b
churc1	chd7	ddx3xb	hirip3	camk2g1	cxxc5a			2)Pick up seven representative genes					==>	thbs3a	supt6h	hdac1	rps15a	tfap2a	dnmbp
copb1	copa	efnb2a	psmb1	cd2ap	dnmbp			3)Make figure						copb2	nono	eif3ha	hirip3	epoa	bmp4
copb2	efnb2a	eif3ha	rpl36	cdc42	etv5b									pxna	gadd45ba	aldoaa	cxcl12a	camk2g1	prkcsh
cyp26a1	gadd45ba	etf1b	rps15a	ctnnb1	ezrb									cav1	chd7	marcksb	cxcl12b	psmd12	kirrel3l
fn1a	gadd45bb	fn1a	rps19	dis3l2	kirrel3l									lamc1	copa	pbx4		med12	notch3
igf2a	her6	hcfc1a		elovl1b	notch3
itgav	naa15a	hdac1		epb41l5	prkcsh
lamc1	neo1a	hmgb1a		epoa	sec61a1l
mob1a	nono	jun		mdm2	sept15_
notch3	rtf1	marcksb		med12	slc43a1a
pxna	rtn4a	myh10		mib1	snap29
rap1b	smarcd1	pbx4		myh9a	yap1
smo	snu13b	rtn4a		prkci
thbs3a	supt6h	slbp		psmd12
		spry4		srgap2
				tfap2a

## Sheet: SDECS_UP
Annotation for biological processes using AmiGO (Consortium, 2019)
Gene list used: Upregulated genes in SDEC clusters between 15 ss and 22 hpf
Danio rerio (REF)	upload_1 ( Hierarchy NEW! )
GO biological process complete	#	#	expected	Fold Enrichment	+/-	raw P value	FDR
arterial endothelial cell differentiation	5	2	0	> 100	+	7.61e-06	0.00174			Selected for presentation in figure 2				8
blood vessel endothelial cell differentiation	12	2	0.01	> 100	+	3.29e-05	0.00572
endothelial cell differentiation	49	3	0.03	98.36	+	4.28e-06	0.00103
epithelial cell differentiation	263	4	0.16	24.43	+	1.87e-05	0.00359
epithelium development	907	16	0.56	28.34	+	6.67e-24	3.13e-20
tissue development	1490	16	0.93	17.25	+	1.77e-20	3.33e-17
anatomical structure development	4629	16	2.88	5.55	+	1.25e-12	8.41e-10
developmental process	4819	16	3	5.33	+	2.38e-12	1.49e-09
cell differentiation	2418	10	1.51	6.64	+	2.59e-07	9.02e-05
cellular developmental process	2433	10	1.51	6.6	+	2.75e-07	9.22e-05
endothelium development	63	3	0.04	76.5	+	8.82e-06	0.00197
blood vessel development	411	6	0.26	23.45	+	1.22e-07	5e-05
vasculature development	490	6	0.31	19.67	+	3.39e-07	0.00011
circulatory system development	977	8	0.61	13.15	+	4.4e-08	1.97e-05
system development	3449	11	2.15	5.12	+	5.85e-07	0.000172
multicellular organism development	4061	16	2.53	6.33	+	1.55e-13	1.12e-10
multicellular organismal process	5021	16	3.13	5.12	+	4.59e-12	2.7e-09
forebrain regionalization	6	2	0	> 100	+	1.01e-05	0.00221
brain development	515	6	0.32	18.72	+	4.52e-07	0.000142
central nervous system development	736	7	0.46	15.28	+	1.49e-07	5.82e-05
nervous system development	1770	7	1.1	6.35	+	4.87e-05	0.00818
head development	535	6	0.33	18.02	+	5.64e-07	0.000171
animal organ development	2727	12	1.7	7.07	+	2.51e-09	1.18e-06
regionalization	409	11	0.25	43.21	+	7.85e-17	7.37e-14
pattern specification process	639	11	0.4	27.65	+	9.62e-15	7.53e-12
endocardial cell differentiation	8	2	0	> 100	+	1.63e-05	0.00325
endocardium development	15	2	0.01	> 100	+	4.91e-05	0.00795
heart development	576	5	0.36	13.95	+	2.05e-05	0.00386
cardiac endothelial cell differentiation	8	2	0	> 100	+	1.63e-05	0.00319
cardiocyte differentiation	71	3	0.04	67.88	+	1.25e-05	0.0026
neural plate development	11	2	0.01	> 100	+	2.82e-05	0.005
chordate embryonic development	526	12	0.33	36.65	+	1.05e-17	1.23e-14
embryo development ending in birth or egg hatching	528	12	0.33	36.51	+	1.1e-17	1.14e-14
embryo development	1169	16	0.73	21.99	+	3.74e-22	1.17e-18
dorsal aorta development	15	2	0.01	> 100	+	4.91e-05	0.00809
aorta development	18	2	0.01	> 100	+	6.85e-05	0.0107
artery development	37	2	0.02	86.84	+	0.000265	0.029
rhombomere morphogenesis	19	2	0.01	> 100	+	7.57e-05	0.0117
anatomical structure morphogenesis	2179	13	1.36	9.58	+	5.3e-12	2.93e-09
rhombomere development	21	2	0.01	> 100	+	9.11e-05	0.0132
hindbrain development	138	3	0.09	34.92	+	8.57e-05	0.0126
somitogenesis	102	10	0.06	> 100	+	1.27e-20	2.99e-17
anatomical structure formation involved in morphogenesis	827	12	0.51	23.31	+	2.17e-15	1.85e-12
segmentation	124	10	0.08	> 100	+	8.16e-20	1.28e-16
somite development	148	16	0.09	> 100	+	3.52e-36	3.31e-32
anterior/posterior pattern specification	247	11	0.15	71.54	+	3.49e-19	4.69e-16
regulation of endothelial cell proliferation	22	2	0.01	> 100	+	9.93e-05	0.0139
regulation of epithelial cell proliferation	36	2	0.02	89.25	+	0.000252	0.0278
intra-Golgi vesicle-mediated transport	27	2	0.02	> 100	+	0.000146	0.0193
oligodendrocyte development	27	2	0.02	> 100	+	0.000146	0.019
oligodendrocyte differentiation	47	2	0.03	68.36	+	0.000419	0.0419
cell development	1439	8	0.9	8.93	+	8.44e-07	0.000233
brain morphogenesis	30	2	0.02	> 100	+	0.000178	0.022
animal organ morphogenesis	845	5	0.53	9.51	+	0.000126	0.0174
organ growth	31	2	0.02	> 100	+	0.000189	0.0231
notochord development	78	5	0.05	> 100	+	1.32e-09	6.87e-07
embryonic organ development	623	8	0.39	20.63	+	1.36e-09	6.72e-07
endothelial cell migration	32	2	0.02	> 100	+	0.000201	0.0239
epithelial cell migration	43	2	0.03	74.72	+	0.000354	0.0361
ameboidal-type cell migration	241	4	0.15	26.66	+	1.34e-05	0.00273
cell migration	694	7	0.43	16.2	+	1e-07	4.28e-05
cell motility	741	7	0.46	15.18	+	1.56e-07	5.85e-05
epithelium migration	47	2	0.03	68.36	+	0.000419	0.0415
substrate adhesion-dependent cell spreading	40	2	0.02	80.33	+	0.000308	0.0325
cell-substrate adhesion	133	4	0.08	48.32	+	1.33e-06	0.000358
cell adhesion	690	5	0.43	11.64	+	4.84e-05	0.00827
cell morphogenesis involved in differentiation	541	6	0.34	17.82	+	6.01e-07	0.000171
cell morphogenesis	635	6	0.4	15.18	+	1.51e-06	0.000395
retinal ganglion cell axon guidance	43	2	0.03	74.72	+	0.000354	0.0365
neuron projection morphogenesis	495	4	0.31	12.98	+	0.000212	0.0246
neuron projection development	594	4	0.37	10.82	+	0.000421	0.0408
plasma membrane bounded cell projection morphogenesis	497	4	0.31	12.93	+	0.000215	0.0246
cell projection morphogenesis	501	4	0.31	12.83	+	0.000222	0.0251
cell part morphogenesis	507	4	0.32	12.67	+	0.000232	0.0259
cellular component morphogenesis	614	4	0.38	10.47	+	0.000477	0.0453
response to chemical	1677	6	1.04	5.75	+	0.000352	0.0367
axonogenesis	435	4	0.27	14.77	+	0.000129	0.0176
cell morphogenesis involved in neuron differentiation	463	4	0.29	13.88	+	0.000164	0.0206
axon development	458	4	0.29	14.03	+	0.000158	0.02
embryonic pattern specification	71	3	0.04	67.88	+	1.25e-05	0.00266
cell-matrix adhesion	93	3	0.06	51.82	+	2.72e-05	0.00492
skeletal muscle tissue development	124	3	0.08	38.87	+	6.28e-05	0.01
muscle tissue development	219	5	0.14	36.68	+	1.94e-07	7e-05
skeletal muscle organ development	136	3	0.08	35.44	+	8.22e-05	0.0123
muscle organ development	185	3	0.12	26.05	+	0.000201	0.0242
muscle structure development	378	4	0.24	17	+	7.57e-05	0.0115
cell population proliferation	141	3	0.09	34.18	+	9.12e-05	0.013
embryonic cranial skeleton morphogenesis	170	3	0.11	28.35	+	0.000157	0.0202
cranial skeletal system development	232	3	0.14	20.77	+	0.000386	0.039
embryonic skeletal system morphogenesis	186	3	0.12	25.91	+	0.000204	0.0239
skeletal system morphogenesis	211	3	0.13	22.84	+	0.000294	0.0314
embryonic skeletal system development	207	3	0.13	23.28	+	0.000278	0.03
embryonic organ morphogenesis	438	4	0.27	14.67	+	0.000133	0.0178
embryonic morphogenesis	727	6	0.45	13.26	+	3.29e-06	0.000814
blood vessel morphogenesis	356	5	0.22	22.56	+	2.04e-06	0.000518
tube morphogenesis	594	5	0.37	13.52	+	2.38e-05	0.00438
tube development	772	6	0.48	12.49	+	4.64e-06	0.00109
gastrulation	239	3	0.15	20.17	+	0.000421	0.0412
heart morphogenesis	241	3	0.15	20	+	0.000431	0.0413
gland development	254	3	0.16	18.97	+	0.000502	0.0471

## Sheet: SDECS_Down
Annotation for biological processes using AmiGO (Consortium, 2019)
Gene list used: Downregulated genes in SDEC clusters between 15 ss and 22 hpf
Danio rerio (REF)	upload_1 ( Hierarchy NEW! )
GO biological process complete	#	#	expected	Fold Enrichment	+/-	raw P value	FDR
peripheral nervous system neuron development	20	2	0.01	> 100	+	8.32e-05	0.0145			Selected for presentation in figure 2				8
neuron development	765	5	0.48	10.5	+	7.88e-05	0.014
cell development	1439	7	0.9	7.81	+	1.28e-05	0.00353
cell differentiation	2418	8	1.51	5.32	+	3.98e-05	0.00748
cellular developmental process	2433	8	1.51	5.28	+	4.16e-05	0.00767
developmental process	4819	16	3	5.33	+	2.38e-12	1.49e-09
anatomical structure development	4629	16	2.88	5.55	+	1.25e-12	8.41e-10
neuron differentiation	947	6	0.59	10.18	+	1.48e-05	0.00387
generation of neurons	979	6	0.61	9.85	+	1.79e-05	0.0042
neurogenesis	1105	6	0.69	8.72	+	3.53e-05	0.00706
nervous system development	1770	9	1.1	8.17	+	2.6e-07	0.000111
system development	3449	11	2.15	5.12	+	5.85e-07	0.000239
multicellular organism development	4061	16	2.53	6.33	+	1.55e-13	1.21e-10
multicellular organismal process	5021	16	3.13	5.12	+	4.59e-12	2.7e-09
peripheral nervous system neuron differentiation	20	2	0.01	> 100	+	8.32e-05	0.0142
peripheral nervous system development	70	3	0.04	68.85	+	1.2e-05	0.00351
somitogenesis	102	10	0.06	> 100	+	1.27e-20	2.99e-17
anatomical structure formation involved in morphogenesis	827	11	0.51	21.37	+	1.55e-13	1.32e-10
anatomical structure morphogenesis	2179	11	1.36	8.11	+	4.86e-09	2.69e-06
chordate embryonic development	526	10	0.33	30.54	+	1.02e-13	1.06e-10
embryo development ending in birth or egg hatching	528	10	0.33	30.43	+	1.06e-13	9.92e-11
embryo development	1169	16	0.73	21.99	+	3.74e-22	1.17e-18
segmentation	124	10	0.08	> 100	+	8.16e-20	1.28e-16
regionalization	409	10	0.25	39.28	+	8.68e-15	1.02e-11
pattern specification process	639	10	0.4	25.14	+	6.83e-13	4.93e-10
somite development	148	16	0.09	> 100	+	3.52e-36	3.31e-32
epithelium development	907	16	0.56	28.34	+	6.67e-24	3.13e-20
tissue development	1490	16	0.93	17.25	+	1.77e-20	3.33e-17
anterior/posterior pattern specification	247	10	0.15	65.04	+	6.32e-17	8.49e-14
post-anal tail morphogenesis	21	2	0.01	> 100	+	9.11e-05	0.0153
embryonic eye morphogenesis	57	3	0.04	84.55	+	6.61e-06	0.0023
eye morphogenesis	227	3	0.14	21.23	+	0.000363	0.0454
sensory organ morphogenesis	312	4	0.19	20.6	+	3.62e-05	0.00709
animal organ development	2727	11	1.7	6.48	+	5.12e-08	2.53e-05
sensory organ development	732	7	0.46	15.36	+	1.43e-07	6.74e-05
eye development	548	5	0.34	14.66	+	1.62e-05	0.00411
visual system development	548	5	0.34	14.66	+	1.62e-05	0.00401
sensory system development	658	5	0.41	12.21	+	3.87e-05	0.00742
embryonic organ morphogenesis	438	4	0.27	14.67	+	0.000133	0.0205
embryonic organ development	623	6	0.39	15.47	+	1.36e-06	0.000531
embryonic morphogenesis	727	5	0.45	11.05	+	6.2e-05	0.0112
neuron recognition	40	2	0.02	80.33	+	0.000308	0.0396
inner ear development	179	4	0.11	35.9	+	4.22e-06	0.00159
ear development	181	4	0.11	35.5	+	4.41e-06	0.00159
pigmentation	143	3	0.09	33.7	+	9.5e-05	0.0157
neural crest cell development	154	3	0.1	31.3	+	0.000118	0.0191
stem cell development	154	3	0.1	31.3	+	0.000118	0.0188
stem cell differentiation	236	3	0.15	20.42	+	0.000406	0.0495
neural crest cell differentiation	170	3	0.11	28.35	+	0.000157	0.0238
mesenchymal cell differentiation	188	3	0.12	25.64	+	0.00021	0.0286
axon guidance	305	4	0.19	21.07	+	3.32e-05	0.00693
neuron projection guidance	306	4	0.19	21	+	3.36e-05	0.00686
neuron projection morphogenesis	495	5	0.31	16.23	+	9.96e-06	0.00334
neuron projection development	594	5	0.37	13.52	+	2.38e-05	0.00545
plasma membrane bounded cell projection organization	955	5	0.59	8.41	+	0.000222	0.0298
cell projection organization	978	5	0.61	8.21	+	0.000248	0.0328
plasma membrane bounded cell projection morphogenesis	497	5	0.31	16.16	+	1.02e-05	0.00329
cell projection morphogenesis	501	5	0.31	16.03	+	1.05e-05	0.0033
cell morphogenesis	635	5	0.4	12.65	+	3.27e-05	0.00698
cell part morphogenesis	507	5	0.32	15.84	+	1.12e-05	0.00338
cellular component morphogenesis	614	5	0.38	13.08	+	2.78e-05	0.00608
chemotaxis	460	4	0.29	13.97	+	0.00016	0.0235
taxis	460	4	0.29	13.97	+	0.00016	0.0232
locomotion	473	4	0.29	13.59	+	0.000178	0.0246
axonogenesis	435	4	0.27	14.77	+	0.000129	0.0203
cell morphogenesis involved in neuron differentiation	463	4	0.29	13.88	+	0.000164	0.0234
cell morphogenesis involved in differentiation	541	4	0.34	11.88	+	0.000296	0.0387
axon development	458	4	0.29	14.03	+	0.000158	0.0235
brain development	515	5	0.32	15.6	+	1.2e-05	0.00343
central nervous system development	736	8	0.46	17.46	+	4.95e-09	2.58e-06
head development	535	5	0.33	15.01	+	1.44e-05	0.00388
camera-type eye development	471	4	0.29	13.64	+	0.000175	0.0246
tube morphogenesis	594	5	0.37	13.52	+	2.38e-05	0.00532
tube development	772	7	0.48	14.57	+	2.05e-07	9.18e-05
tissue morphogenesis	566	4	0.35	11.35	+	0.000351	0.0446
heart development	576	4	0.36	11.16	+	0.000375	0.0464
circulatory system development	977	6	0.61	9.87	+	1.77e-05	0.00426

## Sheet: BVEC-I_UP
Annotation for biological processes using AmiGO (Consortium, 2019)
Gene list used: Upregulated genes in BVEC-I clusters between 15 ss and 22 hpf
Danio rerio (REF)	upload_1 ( Hierarchy NEW! )
GO biological process complete	#	#	expected	Fold Enrichment	+/-	raw P value	FDR
establishment of epithelial cell apical/basal polarity	6	2	0	> 100	+	1.15e-05	0.0015		Selected for presentation in Supplementary figure 4					8
establishment or maintenance of epithelial cell apical/basal polarity	35	2	0.02	86.4	+	0.00027	0.0223
establishment or maintenance of apical/basal cell polarity	36	2	0.02	84	+	0.000285	0.0231
establishment or maintenance of bipolar cell polarity	36	2	0.02	84	+	0.000285	0.0229
cellular process	15071	17	9.97	1.71	+	0.000204	0.0178
establishment of epithelial cell polarity	8	2	0.01	> 100	+	1.84e-05	0.00211
establishment of cell polarity	53	2	0.04	57.06	+	0.000598	0.0432
polarized epithelial cell differentiation	7	2	0	> 100	+	1.48e-05	0.00182
epithelial cell differentiation	263	4	0.17	23	+	2.43e-05	0.00272
epithelium development	907	8	0.6	13.34	+	4.55e-08	1.15e-05
tissue development	1490	11	0.99	11.16	+	2.3e-10	1.44e-07
anatomical structure development	4629	17	3.06	5.55	+	2.26e-13	2.66e-10
developmental process	4819	17	3.19	5.33	+	4.48e-13	4.68e-10
cell differentiation	2418	13	1.6	8.13	+	7.7e-11	6.58e-08
cellular developmental process	2433	13	1.61	8.08	+	8.33e-11	6.52e-08
morphogenesis of a polarized epithelium	19	2	0.01	> 100	+	8.57e-05	0.00848
morphogenesis of an epithelium	478	4	0.32	12.65	+	0.000239	0.0204
tissue morphogenesis	566	5	0.37	13.36	+	2.63e-05	0.00291
anatomical structure morphogenesis	2179	11	1.44	7.63	+	1.27e-08	4.12e-06
establishment of apical/basal cell polarity	7	2	0	> 100	+	1.48e-05	0.00178
establishment of monopolar cell polarity	7	2	0	> 100	+	1.48e-05	0.00176
establishment or maintenance of monopolar cell polarity	7	2	0	> 100	+	1.48e-05	0.0018
cell migration involved in sprouting angiogenesis	7	2	0	> 100	+	1.48e-05	0.00185
blood vessel endothelial cell migration	21	2	0.01	> 100	+	0.000103	0.00969
endothelial cell migration	32	2	0.02	94.5	+	0.000228	0.0196
epithelial cell migration	43	2	0.03	70.33	+	0.0004	0.0306
ameboidal-type cell migration	241	4	0.16	25.1	+	1.73e-05	0.00201
cell migration	694	6	0.46	13.07	+	3.81e-06	0.000551
cell motility	741	6	0.49	12.24	+	5.53e-06	0.000754
epithelium migration	47	2	0.03	64.34	+	0.000475	0.036
tissue migration	54	2	0.04	56	+	0.00062	0.0445
multicellular organismal process	5021	17	3.32	5.12	+	9e-13	8.45e-10
sprouting angiogenesis	107	3	0.07	42.39	+	4.95e-05	0.00529
anatomical structure formation involved in morphogenesis	827	8	0.55	14.63	+	2.24e-08	6.78e-06
blood vessel morphogenesis	356	4	0.24	16.99	+	7.78e-05	0.00786
tube morphogenesis	594	4	0.39	10.18	+	0.000541	0.0394
tube development	772	6	0.51	11.75	+	6.99e-06	0.000938
multicellular organism development	4061	17	2.69	6.33	+	2.46e-14	3.3e-11
blood vessel development	411	4	0.27	14.72	+	0.000135	0.0123
vasculature development	490	5	0.32	15.43	+	1.32e-05	0.0017
circulatory system development	977	7	0.65	10.83	+	1.63e-06	0.000255
system development	3449	17	2.28	7.45	+	1.54e-15	2.41e-12
heart field specification	8	2	0.01	> 100	+	1.84e-05	0.00209
specification of animal organ identity	10	2	0.01	> 100	+	2.7e-05	0.00295
regionalization	409	6	0.27	22.18	+	1.81e-07	4.15e-05
pattern specification process	639	6	0.42	14.2	+	2.38e-06	0.000354
animal organ formation	34	2	0.02	88.94	+	0.000256	0.0214
animal organ morphogenesis	845	7	0.56	12.53	+	6.21e-07	0.000114
animal organ development	2727	17	1.8	9.43	+	2.87e-17	5.4e-14
heart formation	28	2	0.02	> 100	+	0.000177	0.0158
heart morphogenesis	241	3	0.16	18.82	+	0.00052	0.0381
heart development	576	4	0.38	10.5	+	0.000482	0.0362
rhombomere formation	14	2	0.01	> 100	+	4.91e-05	0.0053
rhombomere morphogenesis	19	2	0.01	> 100	+	8.57e-05	0.00857
rhombomere development	21	2	0.01	> 100	+	0.000103	0.00979
hindbrain development	138	5	0.09	54.78	+	2.9e-08	8.02e-06
brain development	515	17	0.34	49.91	+	1.8e-29	1.69e-25
central nervous system development	736	17	0.49	34.92	+	7.14e-27	2.24e-23
nervous system development	1770	17	1.17	14.52	+	1.91e-20	4.48e-17
head development	535	17	0.35	48.04	+	3.41e-29	1.6e-25
peripheral nervous system neuron development	20	2	0.01	> 100	+	9.42e-05	0.00922
neuron development	765	8	0.51	15.81	+	1.23e-08	4.12e-06
cell development	1439	11	0.95	11.56	+	1.59e-10	1.07e-07
neuron differentiation	947	8	0.63	12.77	+	6.33e-08	1.52e-05
generation of neurons	979	8	0.65	12.36	+	8.16e-08	1.92e-05
neurogenesis	1105	8	0.73	10.95	+	2.06e-07	4.6e-05
peripheral nervous system neuron differentiation	20	2	0.01	> 100	+	9.42e-05	0.00913
peripheral nervous system development	70	3	0.05	64.8	+	1.45e-05	0.00184
embryonic retina morphogenesis in camera-type eye	29	2	0.02	> 100	+	0.000189	0.0168
embryonic morphogenesis	727	6	0.48	12.48	+	4.97e-06	0.000686
embryo development	1169	9	0.77	11.64	+	1.5e-08	4.7e-06
retina morphogenesis in camera-type eye	128	4	0.08	47.25	+	1.5e-06	0.000239
camera-type eye morphogenesis	185	6	0.12	49.04	+	1.79e-09	8.42e-07
camera-type eye development	471	8	0.31	25.68	+	2.86e-10	1.68e-07
eye development	548	8	0.36	22.07	+	9.29e-10	4.85e-07
sensory organ development	732	8	0.48	16.52	+	8.73e-09	3.28e-06
visual system development	548	8	0.36	22.07	+	9.29e-10	4.59e-07
sensory system development	658	9	0.44	20.68	+	1.02e-10	7.34e-08
eye morphogenesis	227	6	0.15	39.96	+	5.9e-09	2.31e-06
sensory organ morphogenesis	312	6	0.21	29.08	+	3.76e-08	1.01e-05
retina development in camera-type eye	276	5	0.18	27.39	+	8.35e-07	0.000145
ventricular system development	30	2	0.02	> 100	+	0.000202	0.0177
neuron migration	47	3	0.03	96.51	+	4.61e-06	0.000656
midbrain development	35	2	0.02	86.4	+	0.00027	0.0221
neuron recognition	40	2	0.03	75.6	+	0.000349	0.0275
midbrain-hindbrain boundary development	42	2	0.03	72	+	0.000383	0.0297
rostrocaudal neural tube patterning	48	3	0.03	94.5	+	4.9e-06	0.000687
neural tube patterning	56	3	0.04	81	+	7.62e-06	0.00101
neural tube development	112	3	0.07	40.5	+	5.66e-05	0.0059
chordate embryonic development	526	7	0.35	20.12	+	2.56e-08	7.53e-06
embryo development ending in birth or egg hatching	528	7	0.35	20.05	+	2.63e-08	7.49e-06
anterior/posterior pattern specification	247	6	0.16	36.73	+	9.65e-09	3.49e-06
cardiocyte differentiation	71	3	0.05	63.89	+	1.51e-05	0.00177
axis elongation	49	2	0.03	61.71	+	0.000514	0.0381
somitogenesis	102	4	0.07	59.29	+	6.22e-07	0.000112
segmentation	124	4	0.08	48.77	+	1.32e-06	0.000226
somite development	148	5	0.1	51.08	+	4.07e-08	1.06e-05
cytoplasmic translation	56	2	0.04	54	+	0.000665	0.0466
pigment cell differentiation	57	2	0.04	53.05	+	0.000688	0.0479
pigmentation	143	3	0.09	31.72	+	0.000115	0.0107
embryonic eye morphogenesis	57	2	0.04	53.05	+	0.000688	0.0475
embryonic organ morphogenesis	438	4	0.29	13.81	+	0.000171	0.0155
embryonic organ development	623	4	0.41	9.71	+	0.000646	0.046
skeletal muscle tissue development	124	3	0.08	36.58	+	7.6e-05	0.00776
muscle tissue development	219	3	0.14	20.71	+	0.000394	0.0304
skeletal muscle organ development	136	3	0.09	33.35	+	9.94e-05	0.00953
muscle organ development	185	3	0.12	24.52	+	0.000242	0.0205
convergent extension	150	3	0.1	30.24	+	0.000132	0.0122
axon guidance	305	5	0.2	24.79	+	1.35e-06	0.000227
neuron projection guidance	306	5	0.2	24.71	+	1.37e-06	0.000227
neuron projection morphogenesis	495	6	0.33	18.33	+	5.47e-07	0.000107
neuron projection development	594	7	0.39	17.82	+	5.83e-08	1.44e-05
plasma membrane bounded cell projection organization	955	7	0.63	11.08	+	1.4e-06	0.000227
cell projection organization	978	7	0.65	10.82	+	1.64e-06	0.000253
cellular component organization	4005	14	2.65	5.29	+	2.15e-09	9.64e-07
cellular component organization or biogenesis	4184	14	2.77	5.06	+	3.88e-09	1.58e-06
plasma membrane bounded cell projection morphogenesis	497	6	0.33	18.25	+	5.6e-07	0.000107
cell projection morphogenesis	501	6	0.33	18.11	+	5.86e-07	0.00011
cell morphogenesis	635	8	0.42	19.05	+	2.91e-09	1.24e-06
cell part morphogenesis	507	6	0.34	17.89	+	6.28e-07	0.000111
cellular component morphogenesis	614	6	0.41	14.78	+	1.89e-06	0.000286
chemotaxis	460	6	0.3	19.72	+	3.58e-07	7.64e-05
taxis	460	6	0.3	19.72	+	3.58e-07	7.47e-05
response to external stimulus	1162	6	0.77	7.81	+	6.95e-05	0.00718
locomotion	473	6	0.31	19.18	+	4.2e-07	8.4e-05
response to chemical	1677	7	1.11	6.31	+	5.52e-05	0.00583
axonogenesis	435	6	0.29	20.86	+	2.59e-07	5.66e-05
cell morphogenesis involved in neuron differentiation	463	6	0.31	19.59	+	3.72e-07	7.59e-05
cell morphogenesis involved in differentiation	541	8	0.36	22.36	+	8.41e-10	4.65e-07
axon development	458	7	0.3	23.11	+	1e-08	3.49e-06
regeneration	189	3	0.12	24	+	0.000258	0.0214
embryonic skeletal system development	207	3	0.14	21.91	+	0.000335	0.0267
skeletal system development	374	5	0.25	20.21	+	3.62e-06	0.000531
skeletal system morphogenesis	211	3	0.14	21.5	+	0.000354	0.0277
stem cell differentiation	236	3	0.16	19.22	+	0.000489	0.0365
regulation of biological process	10373	14	6.86	2.04	+	0.000656	0.0464

## Sheet: BVEC-I_Down
Annotation for biological processes using AmiGO (Consortium, 2019)
Gene list used: Downregulated genes in BVEC-I clusters between 15 ss and 22 hpf
Danio rerio (REF)	upload_1 ( Hierarchy NEW! )
GO biological process complete	#	#	expected	Fold Enrichment	+/-	raw P value	FDR
trigeminal sensory nucleus development	4	2	0	> 100	+	9.53e-07	0.00128		Selected for presentation in Supplementary figure 4					8
neural nucleus development	26	2	0.01	> 100	+	2.39e-05	0.0118
anatomical structure development	4629	7	1.26	5.55	+	6.17e-06	0.00527
developmental process	4819	7	1.31	5.33	+	8.18e-06	0.00512
brain development	515	7	0.14	49.91	+	1.37e-12	1.28e-08
central nervous system development	736	7	0.2	34.92	+	1.64e-11	5.13e-08
nervous system development	1770	7	0.48	14.52	+	7.45e-09	1.75e-05
system development	3449	7	0.94	7.45	+	7.89e-07	0.00124
multicellular organism development	4061	7	1.11	6.33	+	2.47e-06	0.0029
multicellular organismal process	5021	7	1.37	5.12	+	1.09e-05	0.0064
head development	535	7	0.15	48.04	+	1.78e-12	8.37e-09
animal organ development	2727	7	0.74	9.43	+	1.53e-07	0.000287
lymphoid lineage cell migration into thymus	8	2	0	> 100	+	2.86e-06	0.00298
lymphoid lineage cell migration	8	2	0	> 100	+	2.86e-06	0.00268
induction of positive chemotaxis	14	2	0	> 100	+	7.61e-06	0.00596
positive regulation of positive chemotaxis	14	2	0	> 100	+	7.61e-06	0.0055
positive regulation of chemotaxis	22	2	0.01	> 100	+	1.75e-05	0.00966
positive regulation of response to external stimulus	49	2	0.01	> 100	+	8.05e-05	0.0291
regulation of response to external stimulus	229	3	0.06	48.1	+	2.47e-05	0.0116
regulation of positive chemotaxis	14	2	0	> 100	+	7.61e-06	0.00511
retinal ganglion cell axon guidance	43	2	0.01	> 100	+	6.26e-05	0.028
neuron migration	47	2	0.01	> 100	+	7.43e-05	0.0291
regulation of intracellular pH	48	2	0.01	> 100	+	7.74e-05	0.0291
regulation of cellular pH	52	2	0.01	> 100	+	9.03e-05	0.0314
regulation of pH	54	2	0.01	> 100	+	9.72e-05	0.0326
homeostatic process	693	4	0.19	21.19	+	1.76e-05	0.00917
cellular monovalent inorganic cation homeostasis	68	2	0.02	> 100	+	0.000152	0.042
chemokine-mediated signaling pathway	59	2	0.02	> 100	+	0.000115	0.0374
cellular response to chemokine	61	2	0.02	> 100	+	0.000123	0.0386
response to chemokine	61	2	0.02	> 100	+	0.000123	0.0373
translation	318	3	0.09	34.64	+	6.5e-05	0.0278
peptide biosynthetic process	325	3	0.09	33.9	+	6.93e-05	0.0283
peptide metabolic process	427	3	0.12	25.8	+	0.000155	0.0415
amide biosynthetic process	419	3	0.11	26.29	+	0.000146	0.0417
embryo development	1169	4	0.32	12.56	+	0.000135	0.0397
immune system process	1226	4	0.33	11.98	+	0.000162	0.0424

## Sheet: KVEC_Up
Annotation for biological processes using AmiGO (Consortium, 2019)
Gene list used: Upregulated genes in KVEC clusters between 15 ss and 22 hpf
Danio rerio (REF)	upload_1 ( Hierarchy NEW! )
GO biological process complete	#	#	expected	Fold Enrichment	+/-	raw P value	FDR
dorsal motor nucleus of vagus nerve development	4	2	0	> 100	+	6.16e-06	0.00109		Selected for presentation in Supplementary figure 4					8
medulla oblongata development	4	2	0	> 100	+	6.16e-06	0.00107
anatomical structure development	4629	17	3.06	5.55	+	2.26e-13	2.66e-10
developmental process	4819	17	3.19	5.33	+	4.48e-13	4.68e-10
hindbrain development	138	5	0.09	54.78	+	2.9e-08	1.19e-05
brain development	515	6	0.34	17.62	+	6.87e-07	0.000161
central nervous system development	736	6	0.49	12.33	+	5.33e-06	0.000981
nervous system development	1770	10	1.17	8.54	+	3.05e-08	1.19e-05
system development	3449	17	2.28	7.45	+	1.54e-15	2.41e-12
multicellular organism development	4061	17	2.69	6.33	+	2.46e-14	3.3e-11
multicellular organismal process	5021	17	3.32	5.12	+	9e-13	8.45e-10
head development	535	6	0.35	16.96	+	8.56e-07	0.000196
animal organ development	2727	17	1.8	9.43	+	2.87e-17	6.75e-14
neural nucleus development	26	2	0.02	> 100	+	0.000154	0.0154
maintenance of epithelial cell apical/basal polarity	8	2	0.01	> 100	+	1.84e-05	0.00271
establishment or maintenance of epithelial cell apical/basal polarity	35	2	0.02	86.4	+	0.00027	0.0242
establishment or maintenance of apical/basal cell polarity	36	2	0.02	84	+	0.000285	0.025
establishment or maintenance of bipolar cell polarity	36	2	0.02	84	+	0.000285	0.0248
establishment or maintenance of cell polarity	136	3	0.09	33.35	+	9.94e-05	0.0106
maintenance of apical/basal cell polarity	8	2	0.01	> 100	+	1.84e-05	0.00263
maintenance of cell polarity	9	2	0.01	> 100	+	2.25e-05	0.00307
pronephric nephron tubule epithelial cell differentiation	8	2	0.01	> 100	+	1.84e-05	0.00267
nephron tubule epithelial cell differentiation	8	2	0.01	> 100	+	1.84e-05	0.00275
epithelial cell differentiation involved in kidney development	40	4	0.03	> 100	+	1.74e-08	9.1e-06
cell differentiation involved in kidney development	41	4	0.03	> 100	+	1.91e-08	8.99e-06
kidney development	197	16	0.13	> 100	+	4.66e-33	4.37e-29
renal system development	198	16	0.13	> 100	+	5.03e-33	2.36e-29
urogenital system development	202	16	0.13	> 100	+	6.84e-33	2.14e-29
cell differentiation	2418	9	1.6	5.63	+	7.03e-06	0.00118
cellular developmental process	2433	9	1.61	5.59	+	7.39e-06	0.00122
epithelial cell differentiation	263	6	0.17	34.49	+	1.39e-08	8.17e-06
epithelium development	907	8	0.6	13.34	+	4.55e-08	1.64e-05
tissue development	1490	9	0.99	9.13	+	1.2e-07	3.42e-05
nephron tubule development	25	2	0.02	> 100	+	0.000143	0.0148
renal tubule development	26	2	0.02	> 100	+	0.000154	0.0152
tube development	772	7	0.51	13.71	+	3.39e-07	8.86e-05
nephron epithelium development	56	4	0.04	> 100	+	6.22e-08	2.09e-05
kidney epithelium development	67	6	0.04	> 100	+	5.11e-12	4.37e-09
nephron development	89	6	0.06	> 100	+	2.59e-11	2.03e-08
pronephric nephron tubule development	16	2	0.01	> 100	+	6.25e-05	0.00753
pronephric nephron development	43	4	0.03	> 100	+	2.29e-08	1.02e-05
pronephros development	135	9	0.09	> 100	+	9.81e-17	1.84e-13
cell differentiation involved in pronephros development	8	2	0.01	> 100	+	1.84e-05	0.0028
positive regulation of Notch signaling pathway	10	2	0.01	> 100	+	2.7e-05	0.00363
rhombomere boundary formation	12	2	0.01	> 100	+	3.72e-05	0.00486
rhombomere formation	14	2	0.01	> 100	+	4.91e-05	0.00607
rhombomere morphogenesis	19	2	0.01	> 100	+	8.57e-05	0.00959
anatomical structure morphogenesis	2179	12	1.44	8.33	+	5.85e-10	4.23e-07
rhombomere development	21	2	0.01	> 100	+	0.000103	0.0109
anatomical structure formation involved in morphogenesis	827	6	0.55	10.97	+	1.03e-05	0.00164
formation of anatomical boundary	16	2	0.01	> 100	+	6.25e-05	0.00744
glomerular filtration	22	3	0.01	> 100	+	5.47e-07	0.000132
renal filtration	27	3	0.02	> 100	+	9.63e-07	0.000215
renal system process	40	3	0.03	> 100	+	2.91e-06	0.000547
apical protein localization	15	2	0.01	> 100	+	5.56e-05	0.00678
iridophore differentiation	16	2	0.01	> 100	+	6.25e-05	0.00734
pigment cell differentiation	57	3	0.04	79.58	+	8.02e-06	0.0013
developmental pigmentation	81	3	0.05	56	+	2.21e-05	0.00305
pigmentation	143	5	0.09	52.87	+	3.45e-08	1.3e-05
glomerulus morphogenesis	17	2	0.01	> 100	+	6.98e-05	0.0081
glomerulus development	63	4	0.04	96	+	9.75e-08	2.86e-05
filopodium assembly	17	2	0.01	> 100	+	6.98e-05	0.008
cell projection assembly	372	4	0.25	16.26	+	9.2e-05	0.00994
pronephric duct development	18	2	0.01	> 100	+	7.76e-05	0.00878
nephric duct development	19	2	0.01	> 100	+	8.57e-05	0.00947
habenula development	19	2	0.01	> 100	+	8.57e-05	0.00936
epithalamus development	22	2	0.01	> 100	+	0.000113	0.0117
podocyte development	26	2	0.02	> 100	+	0.000154	0.0155
glomerular epithelial cell development	26	2	0.02	> 100	+	0.000154	0.0157
glomerular epithelial cell differentiation	31	2	0.02	97.55	+	0.000214	0.0204
glomerular epithelium development	31	2	0.02	97.55	+	0.000214	0.02
epithelial cell development	98	3	0.06	46.29	+	3.84e-05	0.00494
cell development	1439	8	0.95	8.41	+	1.51e-06	0.000303
podocyte differentiation	31	2	0.02	97.55	+	0.000214	0.0202
renal filtration cell differentiation	31	2	0.02	97.55	+	0.000214	0.0198
pronephric glomerulus development	27	2	0.02	> 100	+	0.000165	0.0162
ventricular system development	30	2	0.02	> 100	+	0.000202	0.0193
digestive tract morphogenesis	35	2	0.02	86.4	+	0.00027	0.0239
tube morphogenesis	594	7	0.39	17.82	+	5.83e-08	2.03e-05
melanocyte differentiation	41	2	0.03	73.76	+	0.000365	0.0309
inner ear receptor cell differentiation	46	2	0.03	65.74	+	0.000456	0.0382
inner ear development	179	3	0.12	25.34	+	0.00022	0.0201
ear development	181	4	0.12	33.41	+	5.73e-06	0.00104
sensory organ development	732	8	0.48	16.52	+	8.73e-09	5.47e-06
mechanoreceptor differentiation	66	3	0.04	68.73	+	1.22e-05	0.00192
neuron differentiation	947	8	0.63	12.77	+	6.33e-08	2.05e-05
generation of neurons	979	8	0.65	12.36	+	8.16e-08	2.47e-05
neurogenesis	1105	8	0.73	10.95	+	2.06e-07	5.68e-05
cellular pigmentation	52	2	0.03	58.15	+	0.000577	0.0467
retina development in camera-type eye	276	6	0.18	32.87	+	1.84e-08	9.11e-06
camera-type eye development	471	6	0.31	19.26	+	4.1e-07	0.000104
eye development	548	6	0.36	16.55	+	9.83e-07	0.000215
visual system development	548	6	0.36	16.55	+	9.83e-07	0.00021
sensory system development	658	6	0.44	13.79	+	2.81e-06	0.000539
embryonic heart tube development	171	3	0.11	26.53	+	0.000193	0.0187
heart development	576	5	0.38	13.12	+	2.86e-05	0.00378
circulatory system development	977	7	0.65	10.83	+	1.63e-06	0.000319
embryonic organ development	623	7	0.41	16.99	+	8.04e-08	2.52e-05
embryo development	1169	9	0.77	11.64	+	1.5e-08	8.29e-06
camera-type eye morphogenesis	185	3	0.12	24.52	+	0.000242	0.0219
eye morphogenesis	227	4	0.15	26.64	+	1.38e-05	0.00212
sensory organ morphogenesis	312	5	0.21	24.23	+	1.51e-06	0.000308
animal organ morphogenesis	845	8	0.56	14.31	+	2.64e-08	1.13e-05
epithelial tube morphogenesis	252	4	0.17	24	+	2.06e-05	0.00289
morphogenesis of an epithelium	478	6	0.32	18.98	+	4.47e-07	0.00011
tissue morphogenesis	566	6	0.37	16.03	+	1.18e-06	0.000247
embryonic organ morphogenesis	438	6	0.29	20.71	+	2.69e-07	7.23e-05
embryonic morphogenesis	727	8	0.48	16.64	+	8.28e-09	5.56e-06
cranial skeletal system development	232	3	0.15	19.55	+	0.000466	0.0387
determination of bilateral symmetry	314	4	0.21	19.26	+	4.81e-05	0.0061
specification of symmetry	314	4	0.21	19.26	+	4.81e-05	0.00602
stem cell differentiation	236	3	0.16	19.22	+	0.000489	0.0403
neuron development	765	6	0.51	11.86	+	6.64e-06	0.00113
chordate embryonic development	526	4	0.35	11.5	+	0.000343	0.0295
embryo development ending in birth or egg hatching	528	4	0.35	11.45	+	0.000348	0.0297
actin filament-based process	598	4	0.4	10.11	+	0.000555	0.0453

## Sheet: KVEC_Down
Annotation for biological processes using AmiGO (Consortium, 2019)
Gene list used: Downregulated genes in KVEC clusters between 15 ss and 22 hpf
Danio rerio (REF)	upload_1 ( Hierarchy NEW! )
GO biological process complete	#	#	expected	Fold Enrichment	+/-	raw P value	FDR
pronephric duct development	18	2	0.01	> 100	+	3.77e-05	0.0114		Selected for presentation in Supplementary figure 4					8
pronephros development	135	8	0.06	> 100	+	3.64e-16	8.56e-13
kidney development	197	12	0.09	> 100	+	6.04e-26	5.67e-22
animal organ development	2727	12	1.27	9.43	+	2.09e-12	3.92e-09
anatomical structure development	4629	12	2.16	5.55	+	1.18e-09	1.23e-06
developmental process	4819	12	2.25	5.33	+	1.91e-09	1.8e-06
renal system development	198	12	0.09	> 100	+	6.4e-26	3.01e-22
system development	3449	12	1.61	7.45	+	3.47e-11	5.44e-08
multicellular organism development	4061	12	1.9	6.33	+	2.46e-10	3.3e-07
multicellular organismal process	5021	12	2.34	5.12	+	3.13e-09	2.67e-06
urogenital system development	202	12	0.09	> 100	+	8.08e-26	2.53e-22
nephric duct development	19	2	0.01	> 100	+	4.17e-05	0.0122
kidney epithelium development	67	3	0.03	95.91	+	4.18e-06	0.00187
epithelium development	907	8	0.42	18.89	+	1.09e-09	1.28e-06
tissue development	1490	8	0.7	11.5	+	5.22e-08	3.77e-05
tube development	772	6	0.36	16.65	+	5.95e-07	0.000399
podocyte development	26	2	0.01	> 100	+	7.49e-05	0.019
glomerular epithelial cell development	26	2	0.01	> 100	+	7.49e-05	0.0196
glomerular epithelial cell differentiation	31	2	0.01	> 100	+	0.000105	0.0246
glomerular epithelium development	31	2	0.01	> 100	+	0.000105	0.0234
epithelial cell differentiation involved in kidney development	40	3	0.02	> 100	+	9.48e-07	0.000524
cell differentiation involved in kidney development	41	3	0.02	> 100	+	1.02e-06	0.000531
cell differentiation	2418	7	1.13	6.2	+	3.4e-05	0.0114
cellular developmental process	2433	7	1.14	6.16	+	3.54e-05	0.0115
epithelial cell differentiation	263	4	0.12	32.58	+	5.27e-06	0.00215
podocyte differentiation	31	2	0.01	> 100	+	0.000105	0.024
renal filtration cell differentiation	31	2	0.01	> 100	+	0.000105	0.0228
digestive tract development	99	3	0.05	64.91	+	1.3e-05	0.00508
digestive system development	140	3	0.07	45.9	+	3.57e-05	0.0112
liver development	155	4	0.07	55.28	+	6.7e-07	0.00042
gland development	254	4	0.12	33.73	+	4.6e-06	0.00196
hepaticobiliary system development	159	4	0.07	53.89	+	7.4e-07	0.000435
determination of heart left/right asymmetry	199	3	0.09	32.29	+	9.97e-05	0.0247
heart morphogenesis	241	3	0.11	26.66	+	0.000174	0.0356
animal organ morphogenesis	845	5	0.39	12.67	+	2.54e-05	0.00886
anatomical structure morphogenesis	2179	9	1.02	8.85	+	3.99e-08	3.13e-05
brain development	515	5	0.24	20.8	+	2.34e-06	0.00116
central nervous system development	736	5	0.34	14.55	+	1.31e-05	0.00493
head development	535	5	0.25	20.02	+	2.81e-06	0.00132
morphogenesis of an epithelium	478	4	0.22	17.92	+	5.35e-05	0.0144
tissue morphogenesis	566	4	0.26	15.14	+	0.000103	0.0247
tube morphogenesis	594	4	0.28	14.42	+	0.000124	0.0258
anatomical structure formation involved in morphogenesis	827	5	0.39	12.95	+	2.3e-05	0.0083
plasma membrane bounded cell projection organization	955	5	0.45	11.21	+	4.56e-05	0.013
cell projection organization	978	5	0.46	10.95	+	5.11e-05	0.0141
embryo development	1169	5	0.55	9.16	+	0.000119	0.0254

## Sheet: Prism
Gene list used: Upregulated genes in SDEC clusters between 15 ss and 22 hpf										Gene list used: Downregulated genes in SDEC clusters between 15 ss and 22 hpf										Gene list used: Upregulated genes in BVEC-I clusters between 15 ss and 22 hpf										Gene list used: Downregulated genes in BVEC-I clusters between 15 ss and 22 hpf										Gene list used: Upregulated genes in KVEC clusters between 15 ss and 22 hpf
GO biological process complete	#	#	expected	Fold Enrichment	+/-	raw P value	FDR	Ratio of represented genes/ total no of genes input		GO biological process complete	#	#	expected	Fold Enrichment	+/-	raw P value	FDR	Ratio of represented genes/ total no of genes input		GO biological process complete	#	#	expected	Fold Enrichment	+/-	raw P value	FDR	Ratio of represented genes/ total no of genes input		GO biological process complete	#	#	expected	Fold Enrichment	+/-	raw P value	FDR	Ratio of represented genes/ total no of genes input		GO biological process complete	#	#	expected	Fold Enrichment	+/-	raw P value	FDR	Ratio of represented genes/ total no of genes input
dorsal aorta development	15	2	0.01	> 100	+	4.91e-05	0.00809	0.125	0.125	tissue development	1490	16	0.93	17.25	+	1.77e-20	3.33e-17	1	1	cell motility	741	6	0.49	12.24	+	5.53e-06	0.000754	0.352941	0.352941	head development	535	7	0.15	48.04	+	1.78e-12	8.37e-09	1	1	epithelium development	907	8	0.6	13.34	+	4.55e-08	1.64e-05	0.444444	0.444444
blood vessel development	411	6	0.26	23.45	+	1.22e-07	5e-05	0.375	0.375	segmentation	124	10	0.08	> 100	+	8.16e-20	1.28e-16	0.625	0.625	anatomical structure morphogenesis	2179	11	1.44	7.63	+	1.27e-08	4.12e-06	0.647059	0.647059	central nervous system development	736	7	0.2	34.92	+	1.64e-11	5.13e-08	1	1	epithelial cell differentiation involved in kidney development	40	4	0.03	> 100	+	1.74e-08	9.1e-06	0.222222	0.222222
vasculature development	490	6	0.31	19.67	+	3.39e-07	0.00011	0.375	0.375	somite development	148	16	0.09	> 100	+	3.52e-36	3.31e-32	1	1	cell migration	694	6	0.46	13.07	+	3.81e-06	0.000551	0.352941	0.352941	nervous system development	1770	7	0.48	14.52	+	7.45e-09	1.75e-05	1	1	cell differentiation involved in kidney development	41	4	0.03	> 100	+	1.91e-08	8.99e-06	0.222222	0.222222
endothelium development	63	3	0.04	76.5	+	8.82e-06	0.00197	0.1875	0.1875	chordate embryonic development	526	10	0.33	30.54	+	1.02e-13	1.06e-10	0.625	0.625	developmental process	4819	17	3.19	5.33	+	4.48e-13	4.68e-10	1	1	brain development	515	7	0.14	49.91	+	1.37e-12	1.28e-08	1	1	nephron tubule epithelial cell differentiation	8	2	0.01	> 100	+	1.84e-05	0.00275	0.111111	0.111111
developmental process	4819	16	3	5.33	+	2.38e-12	1.49e-09	1	100	somitogenesis	102	10	0.06	> 100	+	1.27e-20	2.99e-17	0.625	0.625	tissue development	1490	11	0.99	11.16	+	2.3e-10	1.44e-07	0.647059	0.647059	developmental process	4819	7	1.31	5.33	+	8.18e-06	0.00512	1	1	pronephric nephron tubule epithelial cell differentiation	8	2	0.01	> 100	+	1.84e-05	0.00267	0.111111	0.111111
tissue development	1490	16	0.93	17.25	+	1.77e-20	3.33e-17	1	100	neurogenesis	1105	6	0.69	8.72	+	3.53e-05	0.00706	0.375	0.375	epithelium development	907	8	0.6	13.34	+	4.55e-08	1.15e-05	0.470588	0.470588	anatomical structure development	4629	7	1.26	5.55	+	6.17e-06	0.00527	1	1	maintenance of epithelial cell apical/basal polarity	8	2	0.01	> 100	+	1.84e-05	0.00271	0.111111	0.111111
epithelium development	907	16	0.56	28.34	+	6.67e-24	3.13e-20	1	100	developmental process	4819	16	3	5.33	+	2.38e-12	1.49e-09	1	1	epithelial cell differentiation	263	4	0.17	23	+	2.43e-05	0.00272	0.235294	0.235294	neural nucleus development	26	2	0.01	> 100	+	2.39e-05	0.0118	0.285714	0.285714	developmental process	4819	17	3.19	5.33	+	4.48e-13	4.68e-10	0.944444	0.944444
arterial endothelial cell differentiation	5	2	0	> 100	+	7.61e-06	0.00174	0.125	0.125	cell differentiation	2418	8	1.51	5.32	+	3.98e-05	0.00748	0.5	0.5	establishment of epithelial cell apical/basal polarity	6	2	0	> 100	+	1.15e-05	0.0015	0.117647	0.117647	trigeminal sensory nucleus development	4	2	0	> 100	+	9.53e-07	0.00128	0.285714	0.285714	anatomical structure development	4629	17	3.06	5.55	+	2.26e-13	2.66e-10	0.944444	0.944444
Total number of genes input	16									Total number of genes input	16									Total number of genes input	17									Total number of genes input	7									Total number of genes input	18
Gene list used: Upregulated genes in SDEC clusters between 15 ss and 22 hpf										Gene list used: Downregulated genes in SDEC clusters between 15 ss and 22 hpf										Gene list used: Upregulated genes in BVEC-I clusters between 15 ss and 22 hpf										Gene list used: Downregulated genes in BVEC-I clusters between 15 ss and 22 hpf										Gene list used: Upregulated genes in KVEC clusters between 15 ss and 22 hpf
dorsal aorta development	endothelium development	arterial endothelial cell differentiation	vasculature development	blood vessel development	developmental process	tissue development	epithelium development			tissue development	somite development	developmental process	chordate embryonic development	segmentation	somitogenesis	cell differentiation	neurogenesis			developmental process	anatomical structure morphogenesis	tissue development	epithelium development	cell motility	cell migration	epithelial cell differentiation	establishment of epithelial cell apical/basal polarity			head development	nervous system development	central nervous system development	developmental process	anatomical structure development	brain development	neural nucleus development	trigeminal sensory nucleus development			developmental process	anatomical structure development	epithelium development	cell differentiation involved in kidney development	epithelial cell differentiation involved in kidney development	pronephric nephron tubule epithelial cell differentiation	maintenance of epithelial cell apical/basal polarity	nephron tubule epithelial cell differentiation
0.00809	0.00197	0.00174	0.00011	5e-05	1.49e-09	3.33e-17	3.13e-20	FDR		1	1	1	0.625	0.625	0.625	0.5	0.375			1	0.647059	0.647059	0.470588	0.352941	0.352941	0.235294	0.117647			1	1	1	1	1	1	0.285714	0.285714			0.944444	0.944444	0.444444	0.222222	0.222222	0.111111	0.111111	0.111111	Ratio of represented genes/ total no of genes input
dorsal aorta development	arterial endothelial cell differentiation	endothelium development	epithelium development	blood vessel development	vasculature development	tissue development	developmental process			segmentation	somite development	somitogenesis	chordate embryonic development	tissue development	neurogenesis	developmental process	cell differentiation			establishment of epithelial cell apical/basal polarity	epithelial cell differentiation	epithelium development	cell migration	cell motility	tissue development	anatomical structure morphogenesis	developmental process			trigeminal sensory nucleus development	neural nucleus development	brain development	head development	central nervous system development	nervous system development	anatomical structure development	developmental process			nephron tubule epithelial cell differentiation	epithelial cell differentiation involved in kidney development	cell differentiation involved in kidney development	maintenance of epithelial cell apical/basal polarity	pronephric nephron tubule epithelial cell differentiation	epithelium development	anatomical structure development	developmental process
> 100	> 100	76.5	28.34	23.45	19.67	17.25	5.33	Fold Enrichment		> 100	> 100	> 100	30.54	17.25	8.72	5.33	5.32			> 100	23	13.34	13.07	12.24	11.16	7.63	5.33			> 100	> 100	49.91	48.04	34.92	14.52	5.55	5.33			> 100	> 100	> 100	> 100	> 100	13.34	5.55	5.33
developmental process	tissue development	epithelium development	vasculature development	blood vessel development	endothelium development	dorsal aorta development	arterial endothelial cell differentiation			developmental process	somite development	tissue development	somitogenesis	segmentation	chordate embryonic development	cell differentiation	neurogenesis			developmental process	tissue development	anatomical structure morphogenesis	epithelium development	cell migration	cell motility	epithelial cell differentiation	establishment of epithelial cell apical/basal polarity			brain development	developmental process	central nervous system development	anatomical structure development	nervous system development	head development	neural nucleus development	trigeminal sensory nucleus development			developmental process	anatomical structure development	epithelium development	epithelial cell differentiation involved in kidney development	cell differentiation involved in kidney development	nephron tubule epithelial cell differentiation	pronephric nephron tubule epithelial cell differentiation	maintenance of epithelial cell apical/basal polarity
4819	1490	907	490	411	63	15	5	# 1		1	1	1	0.625	0.625	0.625	0.5	0.375	Ratio of represented genes/ total no of genes input		1	0.647059	0.647059	0.470588	0.352941	0.352941	0.235294	0.117647	Ratio of represented genes/ total no of genes input		1	1	1	1	1	1	0.285714	0.285714			0.944444	0.944444	0.444444	0.222222	0.222222	0.111111	0.111111	0.111111
tissue development	epithelium development	developmental process	vasculature development	blood vessel development	endothelium development	dorsal aorta development	arterial endothelial cell differentiation
16	16	16	6	6	3	2	2	# 2
epithelium development	developmental process	tissue development	vasculature development	blood vessel development	endothelium development	dorsal aorta development	arterial endothelial cell differentiation
1	1	1	0.375	0.375	0.1875	0.125	0.125	Ratio of represented genes/ total no of genes input
[truncated: 10 more columns]
