# Supplementary material for: Dermomyotome-derived endothelial cells migrate to the dorsal aorta to support hematopoietic stem cell emergence
Source: eLife. 2023 Sep 11;12:e58300. doi: 10.7554/eLife.58300 (PMC10495111; doi:10.7554/eLife.58300)
Supplement: Figure 3—source data 1. — Embryo’ somites were converted at developmental stages ranging from 4 to 18 somite stage (Column C) and imaged at 32–36 dpf. The imaging date (Column A), sample number within a cohort (Column B), and the number of observed SDECs (Column D) used for the quantification were documented, and the quantification and presented graph were done in Prism 9 (GraphPad). [file elife-58300-fig3-data1.xlsx]

## Sheet: Sheet1
	A table of all converted Tg(actb2:nls-Eos);Tg(fli1:eGFP)y1 embryos that were included in the final SDECs quantification assay.
	Embryo' somites were converted at developmental stages ranging from 4-18 somite stage (Column C) and imaged at 32-36 dpf.
	The date of imaging(Column A), sample number within a cohort (Column B), and No. of observed SDECs (Column D) used for the quantification was documented and quantification and presented graph was done in Prism 9 (GraphPad)
Date/Set	Embryo ID	Converted Somite #	No of SDECs
2202023	3	4	0
2202023	6	4	0
2202023	17	4	0
8182022	3	4	0
11032022	1	4	0
02032023-early	2	4	0
02032023-early	6	4	0
02032023-early	9	4	0
02032023-early	12	4	0
2202023	9	5	0
2212023	12	5	2
11032022	2	5	0
02032023-early	3	5	0
02032023-early	7	5	2
2212023	4	6	2
2212023	11	6	3
11032022	8	6	4
11032022	10	6	0
11102022	1	6	2
11102022	2	6	1
11102022	4	6	1
12212022	3	6	0
2202023	7	7	3
2202023	12	7	3
10202022	1	7	0
10202022	2	7	3
10202022	3	7	3
11032022	9	7	4
12212022	6	7	0
2202023	1	8	0
2202023	2	8	4
2202023	10	8	2
2212023	6	8	0
2212023	7	8	3
8252022	6	8	3
10202022	5	8	0
10202022	6	8	2
11032022	5	8	0
11032022	6	8	0
11032022	7	8	3
11102022	8	8	2
11102022	12	8	2
8252022	10	9	0
8252022	13	9	1
8252022	16	9	0
10202022	4	9	3
11102022	10	9	0
11102022	14	9	3
12212022	1	9	2
12212022	4	9	2
12212022	9	9	2
12212022	12	9	3
12212022	13	9	4
02092023 7to13ss	9	9	2
8252022	5	10	0
8252022	8	10	2
8252022	14	10	0
8252022	15	10	0
11032022	11	10	0
11102022	3	10	2
11102022	7	10	2
11102022	9	10	1
12212022	8	10	1
12212022	11	10	1
12212022	14	10	2
02092023 7to13ss	3	10	2
02162023 13ss	1	10	3
8252022	1	11	2
8252022	3	11	0
8252022	9	11	0
8252022	11	11	0
8252022	12	11	3
8252022	17	11	2
11102022	13	11	1
12212022	2	11	6
12212022	7	11	2
12212022	10	11	0
12212022	15	11	4
02032023-late	4	11	1
02092023 7to13ss	11	11	2
8252022	4	12	0
9282022	4	12	4
9282022	6	12	1
02032023-late	1	12	3
02032023-late	2	12	3
02032023-late	3	12	1
02092023 7to13ss	15	12	1
10202022	8	13	1
02092023 7to13ss	12	13	2
02162023 13ss	3	13	3
02162023 13ss	4	13	2
1202023-Late	7	13	1
2092023 7to13ss	16	13	2
2092023 7to13ss	17	13	3
9282022	2	14	2
9282022	3	14	0
9282022	5	14	3
1202023	1	14	4
10202022	6	14	2
10202022	9	14	0
10202022	10	14	0
10202022	14	14	1
02092023 7to13ss	14	14	2
9122022	1	15	2
9122022	3	15	0
9132022	2	15	3
9132022	6	15	0
9132022	7	15	2
9282022	1	15	2
10202022	5	15	2
10202022	13	15	3
02092023-18ss	5	15	0
1202023-Late	2	15	1
1202023-Late	6	15	4
2092023 7to13ss	18	15	2
22423	1	16	3
22423	2	16	3
22423	3	16	3
9122022	4	16	0
9122022	5	16	0
02092023-16ss	4	16	1
02092023-18ss	8	16	5
1202023-Late	4	16	0
9132022	4	17	1
9132022	5	17	0
9242022	1	17	3
9242022	2	17	1
9242022	3	17	0
9242022	4	17	0
10202022	12	17	4
02092023-18ss	2	17	1
02092023-18ss	3	17	4
02092023-18ss	12	17	0
1202023-Late	1	17	1
9132022	1	18	2
9242022	5	18	0
10202022	4	18	3
02092023-18ss	1	18	4
02092023-18ss	4	18	4
02092023-18ss	7	18	1
02092023-18ss	11	18	1
